# Supplementary material for: Electrochemical metal- and oxidant-free synthesis of S-thiocarbamates
Source: Royal Society of Chemistry journal article supplement (doi:10.1039/d1ob01701b), 2021-01-01

## Supporting information

### **Electrochemical Metal-, Oxidant-free Synthesis of S-Thiocarbamates**

*Bhanwar Kumar Malviya,<sup>a</sup> Ved Prakash Verma,<sup>b</sup> Siddharth Sharma<sup>\*†</sup>*

<sup>a</sup>Department of Chemistry, Mohanlal Sukhadia University, Udaipur, 313001, India

<sup>b</sup>Department of Chemistry, Banasthali University, Newai-Jodhpuriya Road, Vanasthali,  
304022, India

\*E-mail: [siddharth@mlsu.ac.in](mailto:siddharth@mlsu.ac.in), [sidcdri@gmail.com](mailto:sidcdri@gmail.com)

### **Table of Contents**

|                                                                                                      |           |
|------------------------------------------------------------------------------------------------------|-----------|
| <b>1. Experimental setup for batch and flow conditions.....</b>                                      | <b>S2</b> |
| <b>2. Evaluation of reaction optimization experiment with <math>\mu</math>-EFR.....</b>              | <b>S3</b> |
| <b>3. Pt@Cu cathode preparation.....</b>                                                             | <b>S3</b> |
| <b>4. Fabrication of micro-electrolysis flow reactor (<math>\mu</math>-EFR).....</b>                 | <b>S4</b> |
| <b>5. <sup>1</sup>H, <sup>13</sup>C and <sup>19</sup>F NMR Spectra of synthesized compounds.....</b> | <b>S6</b> |

## 1. Experimental Setup for electro batch condition

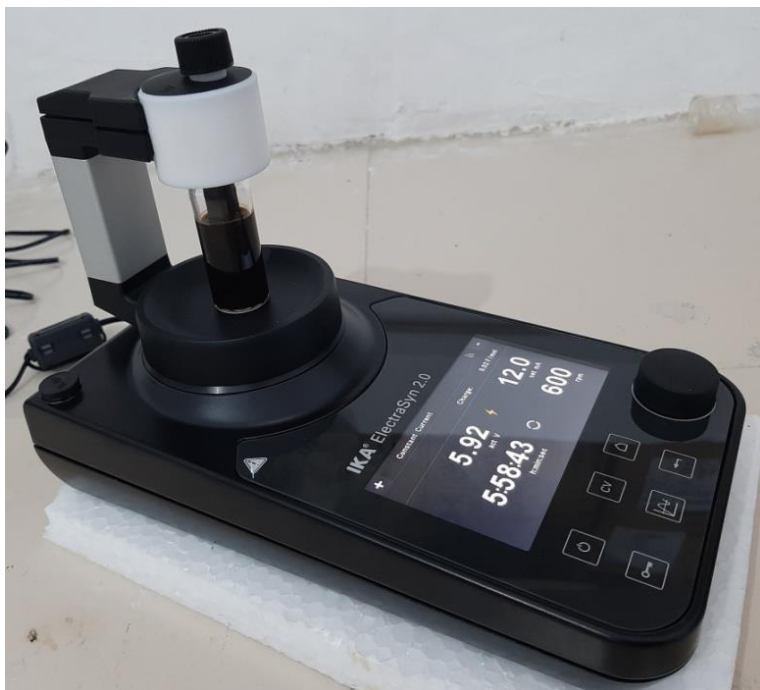

**Fig. S1** IKA ElectraSyn 2.0 for batch process

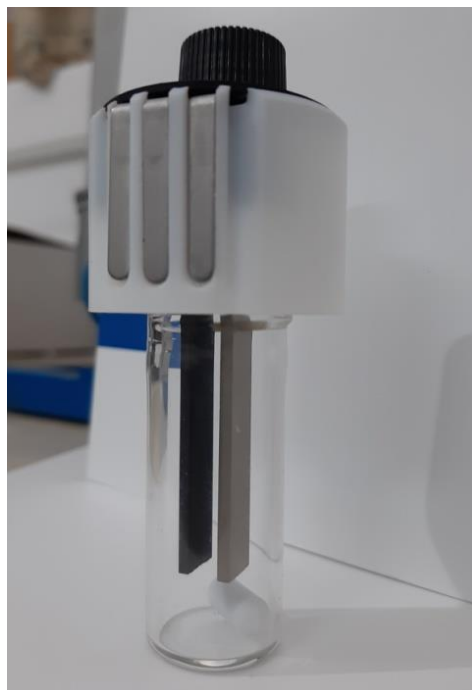

**Fig. S2** 10 ml reaction vessel with graphite & Pt electrodes

## Experimental Setup for electro flow condition

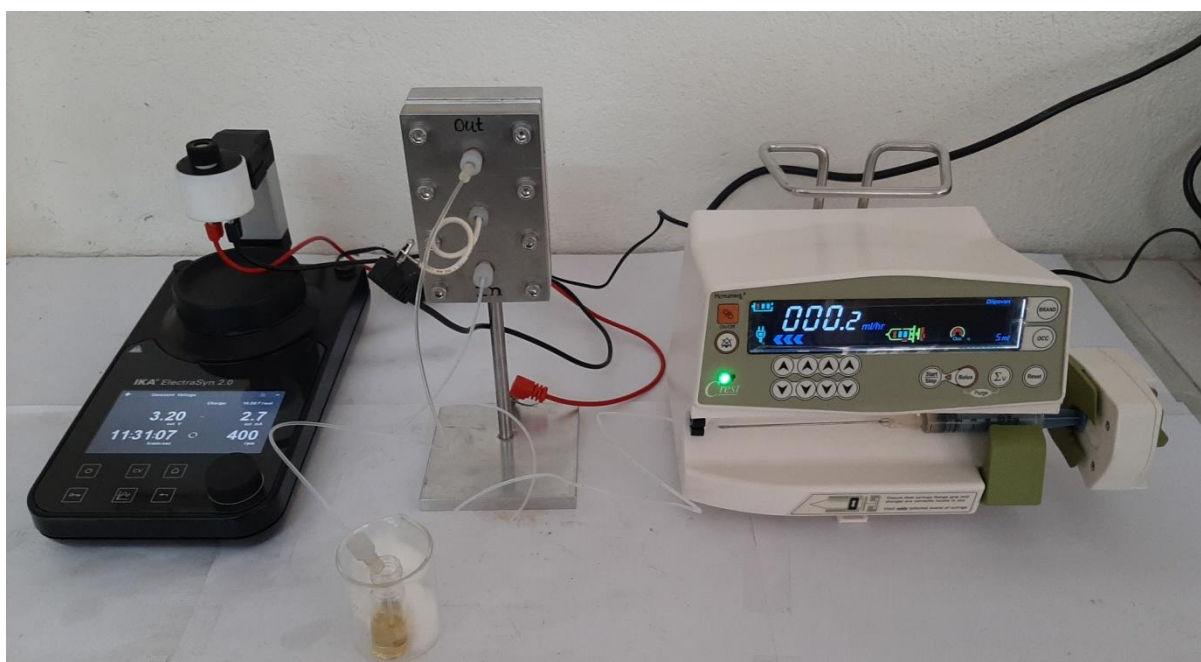

**Fig. S3** IKA ElectraSyn 2.0 as power supply (left),  $\mu$ -EFR (middle), syringe pump (right).

## 2. Evaluation of reaction optimization experiment with $\mu$ -EFR.

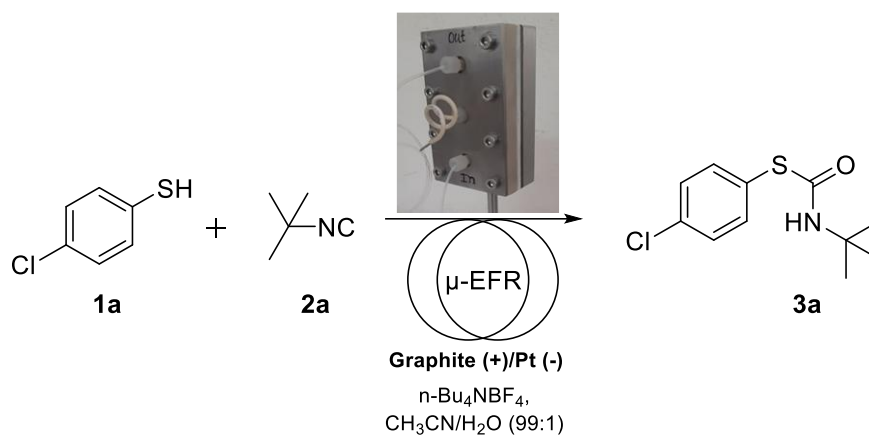

**Table S1:**

| Entry     | Concentration<br>[mol/L] | Flow rate<br>[ml/min] | Current density<br>[mA/cm <sup>2</sup> ] | Current<br>[F/mol] | Conversion %<br>(yield %) <sup>a</sup> |
|-----------|--------------------------|-----------------------|------------------------------------------|--------------------|----------------------------------------|
| 1.        | 0.2                      | 0.005                 | 0.87                                     | 3.0                | >99 (62)                               |
| 2.        | 0.2                      | 0.01                  | 0.87                                     | 3.0                | >99 (77)                               |
| <b>3.</b> | <b>0.2</b>               | <b>0.02</b>           | <b>0.87</b>                              | <b>3.0</b>         | <b>&gt;99 (85)</b>                     |
| 4.        | 0.2                      | 0.03                  | 0.87                                     | 3.0                | >85 (52)                               |
| 5.        | 0.33                     | 0.02                  | 0.87                                     | 3.0                | >90 (78)                               |
| 6.        | 0.17                     | 0.02                  | 0.87                                     | 3.0                | >99 (80)                               |

## 3. Pt@Cu cathode preparation: Modified phosphates bath-based method has been used

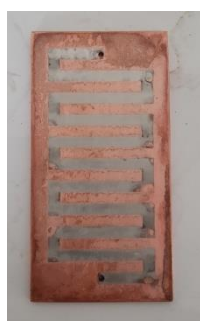

for deposition of Pt over the Cu plate cathode. In this method, stock electrolytic solution containing mixture of Pt(IV) chlorides 150 mg, diammonium hydrogen phosphate  $(\text{NH}_4)_2\text{HPO}_4$  80 mg, disodium hydrogen phosphate  $(\text{Na})_2\text{HPO}_4$  200 mg, ammonium chloride 50 mg, and water 10 mL, was pumped with fix flow rate of  $100 \mu\text{L min}^{-1}$  for 2h at  $70^\circ\text{C}$  under current density of  $0.003 \text{ A/cm}^2$ , which typically led to the generation of a silver-black colored patterning, and then washed with water thoroughly to remove any unreacted salt and nanoparticle.

**Reference** - Raub, J.; Baumgärtner, ME. *Platinum Metals Rev.* **1988**, 32, 188.

#### 4. Fabrication of micro-electrolysis flow reactor ( $\mu$ -EFR)

Micro electro-flow outer body was fabricated using a stainless-steel body jacket (**A1**: 100 mm length x 64 mm width x 3 mm thickness) and second layer was fabricated 10 mm thickness high dens nylon plate (**A2**: 100 mm length x 64 mm width), it has a hole in the middle that allows an easy connection of the electrodes to the power supply by a copper wire and also has 2 holes, one for the inlet and one for the outlet of the reaction solution. The third layer was fabricated with teflon (**A3**: 100 mm length x 64 mm width x 0.5 mm thickness) layer made with laser cutter for protecting the nylon and stainless steel from the corrosive acid base and insulator for the current flow. Fourth layer copper electrode was customized as per the reactor size (**A4**: 72 mm length x 38 mm width x 1 mm thickness) these are fitted in same size rectangular shape groove, 1mm thickness PTFE core plate. For the solution flow under the constant current, fifth layer consisted of a laser cutted PTFE plate (**A5**: 100 mm x 64 mm x 1 mm thickness) zigzag groove with rectangular shape (2 mm x 350 mm x 1 mm = 700  $\mu$ L vol.), exposed electrode surface: 7 cm<sup>2</sup>. Next, graphite anode was customized as per the reactor size (**A6**; 100 mm length x 64 mm width x 2 mm thickness). Last layer aluminium body (**A7**: 100 mm length x 64 mm width x 15 mm thickness). After fabrication of each layer and to align the patterns order **A1** to **A7**. Thereafter, both the electrodes were sandwiched by 2 mm teflon zig-zag channel sheets with identical dimension to fit groove channels and coupled to each other by inserting metal allenkey bolts through the eight holes on aluminium body plate. Finally, the metal holder was tightly pressed by help of allenkey driver to seal the device with no leak (**Fig. S4, S5, S6, S7**).



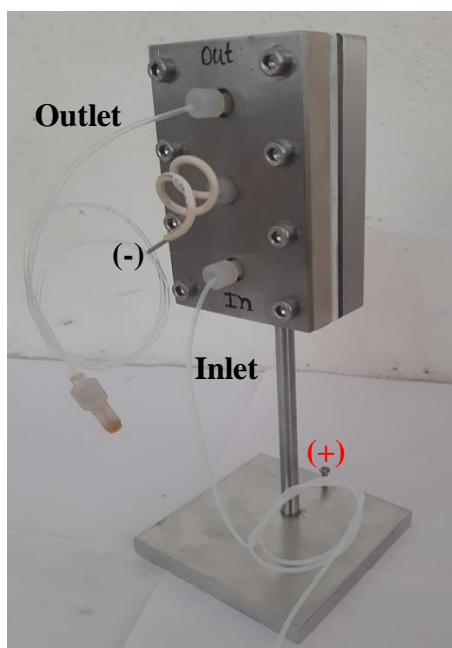

**Fig. S4.** Original Image of  $\mu$ -EFR

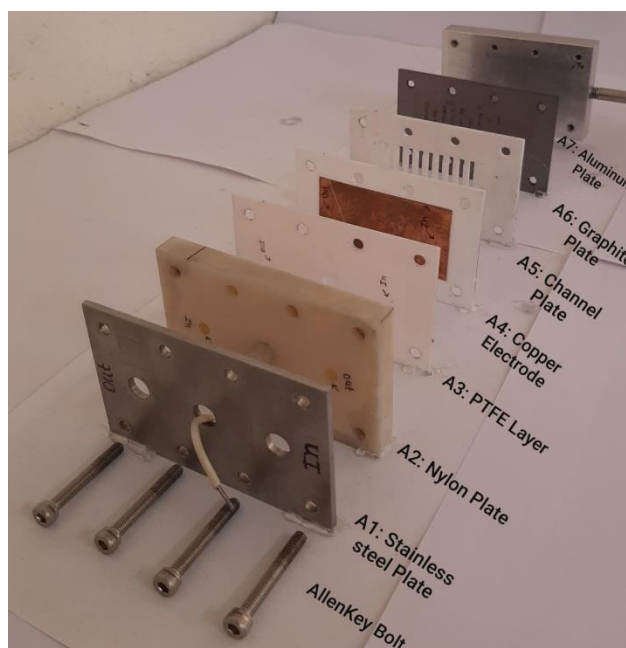

**Fig. S5.** Components of  $\mu$ -EFR

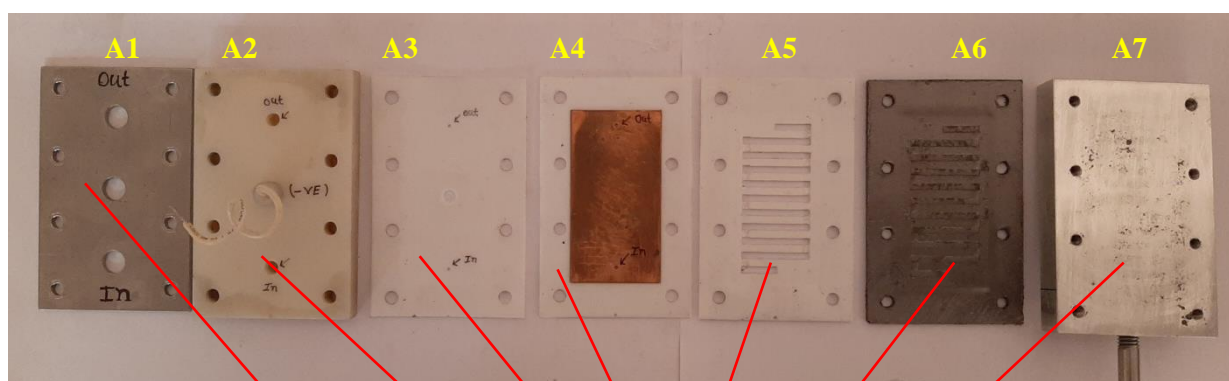

- A1: Stainless steel plate**
- A2: Nylon plate**
- A3: PTFE plate**
- A4: PTFE core copper plate**
- A5: PTFE channel plate**
- A6: Graphite plate**
- A7: Aluminum plate with  $\phi$  5mm thread**

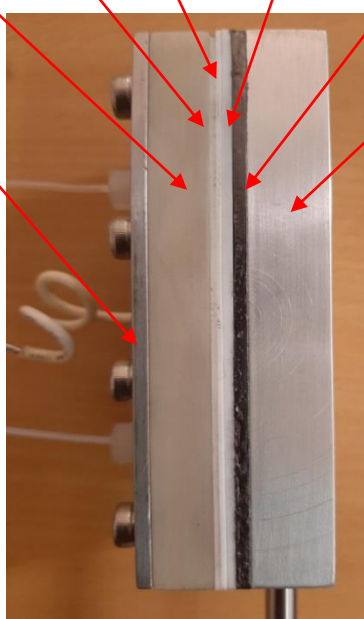

**Fig. S6, S7**

B series NMR  
B-13

7.461  
7.456  
7.445  
7.440  
7.433  
7.380  
7.375  
7.369  
7.358  
7.353  
7.347  
7.265

5.205

1.348

0.000

$^1\text{H}$  NMR (400 MHz,  $\text{CDCl}_3$ ) in Batch Process

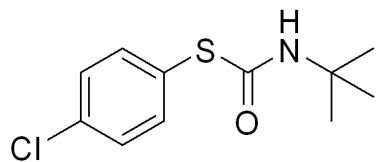

(3a)

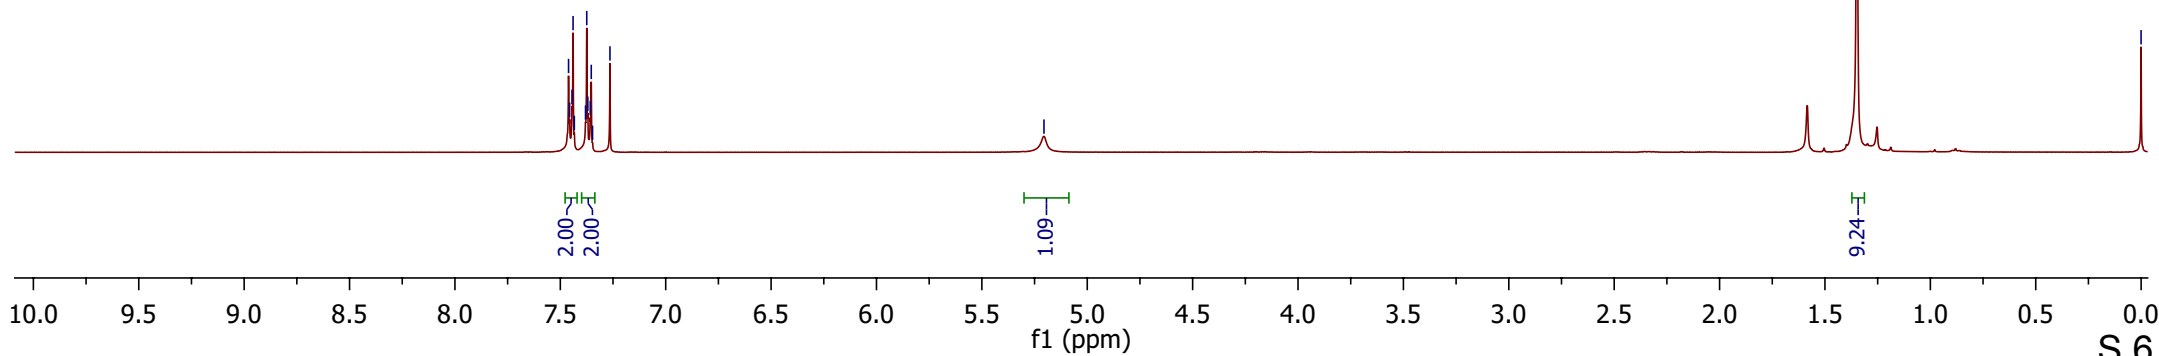

B series NMR  
B-13

—163.14

—136.54  
—135.63

—129.30  
—127.30

77.32  
77.00  
76.68

—53.70

—28.83

# <sup>13</sup>C NMR (100 MHz, CDCl<sub>3</sub>) in Batch Process

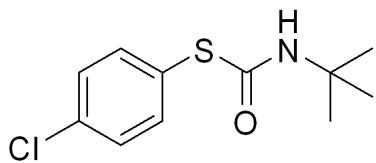

(3a)

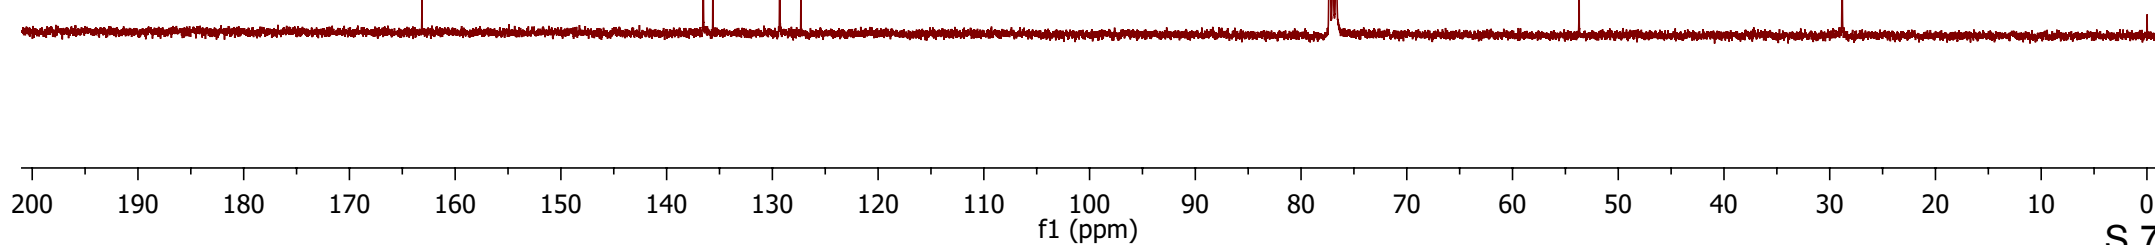

New NMR  
b-13

# <sup>1</sup>H NMR (400 MHz, CDCl<sub>3</sub>) in Flow Process

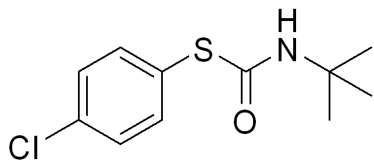

(3a)

7.461  
7.455  
7.450  
7.439  
7.434  
7.427  
7.375  
7.369  
7.364  
7.353  
7.348  
7.341  
7.260

5.210

1.342

||

~

2.06  
2.02

1.00

9.20

10.0 9.5 9.0 8.5 8.0 7.5 7.0 6.5 6.0 5.5 5.0 4.5 4.0 3.5 3.0 2.5 2.0 1.5 1.0 0.5 0.0  
f1 (ppm)

163.14

136.54  
135.63

129.30  
127.30

77.32  
77.00  
76.68

53.70

28.83

# <sup>13</sup>C NMR (100 MHz, CDCl<sub>3</sub>) in Flow Process

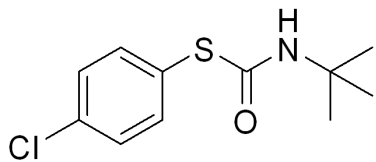

(3a)

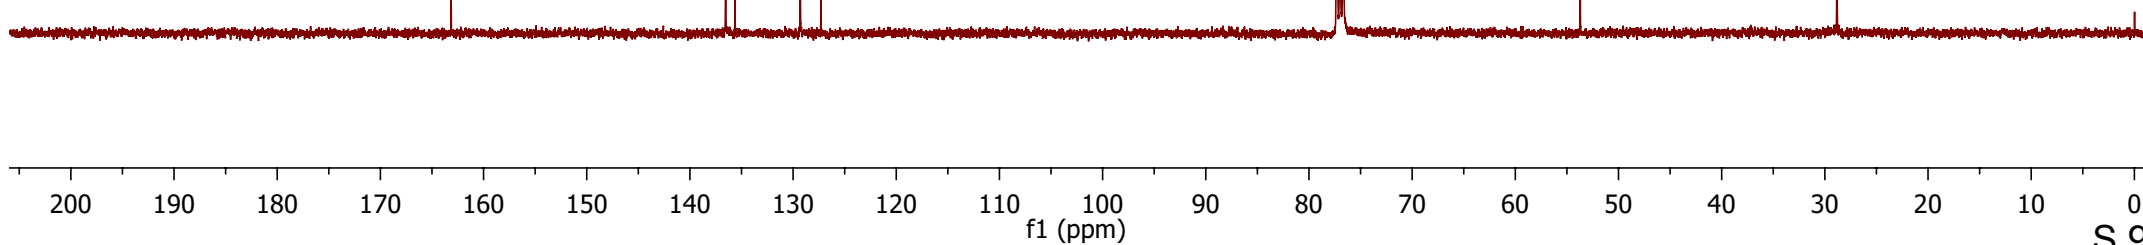

B series NMR  
B-05

7.513  
7.508  
7.500  
7.497  
7.494  
7.491  
7.483  
7.478  
7.260  
7.114  
7.107  
7.101  
7.090  
7.085  
7.080  
7.069  
7.063  
7.056

5.221

1.334

# <sup>1</sup>H NMR (400 MHz, CDCl<sub>3</sub>)

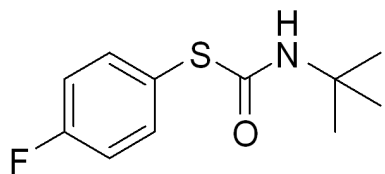

(3b)

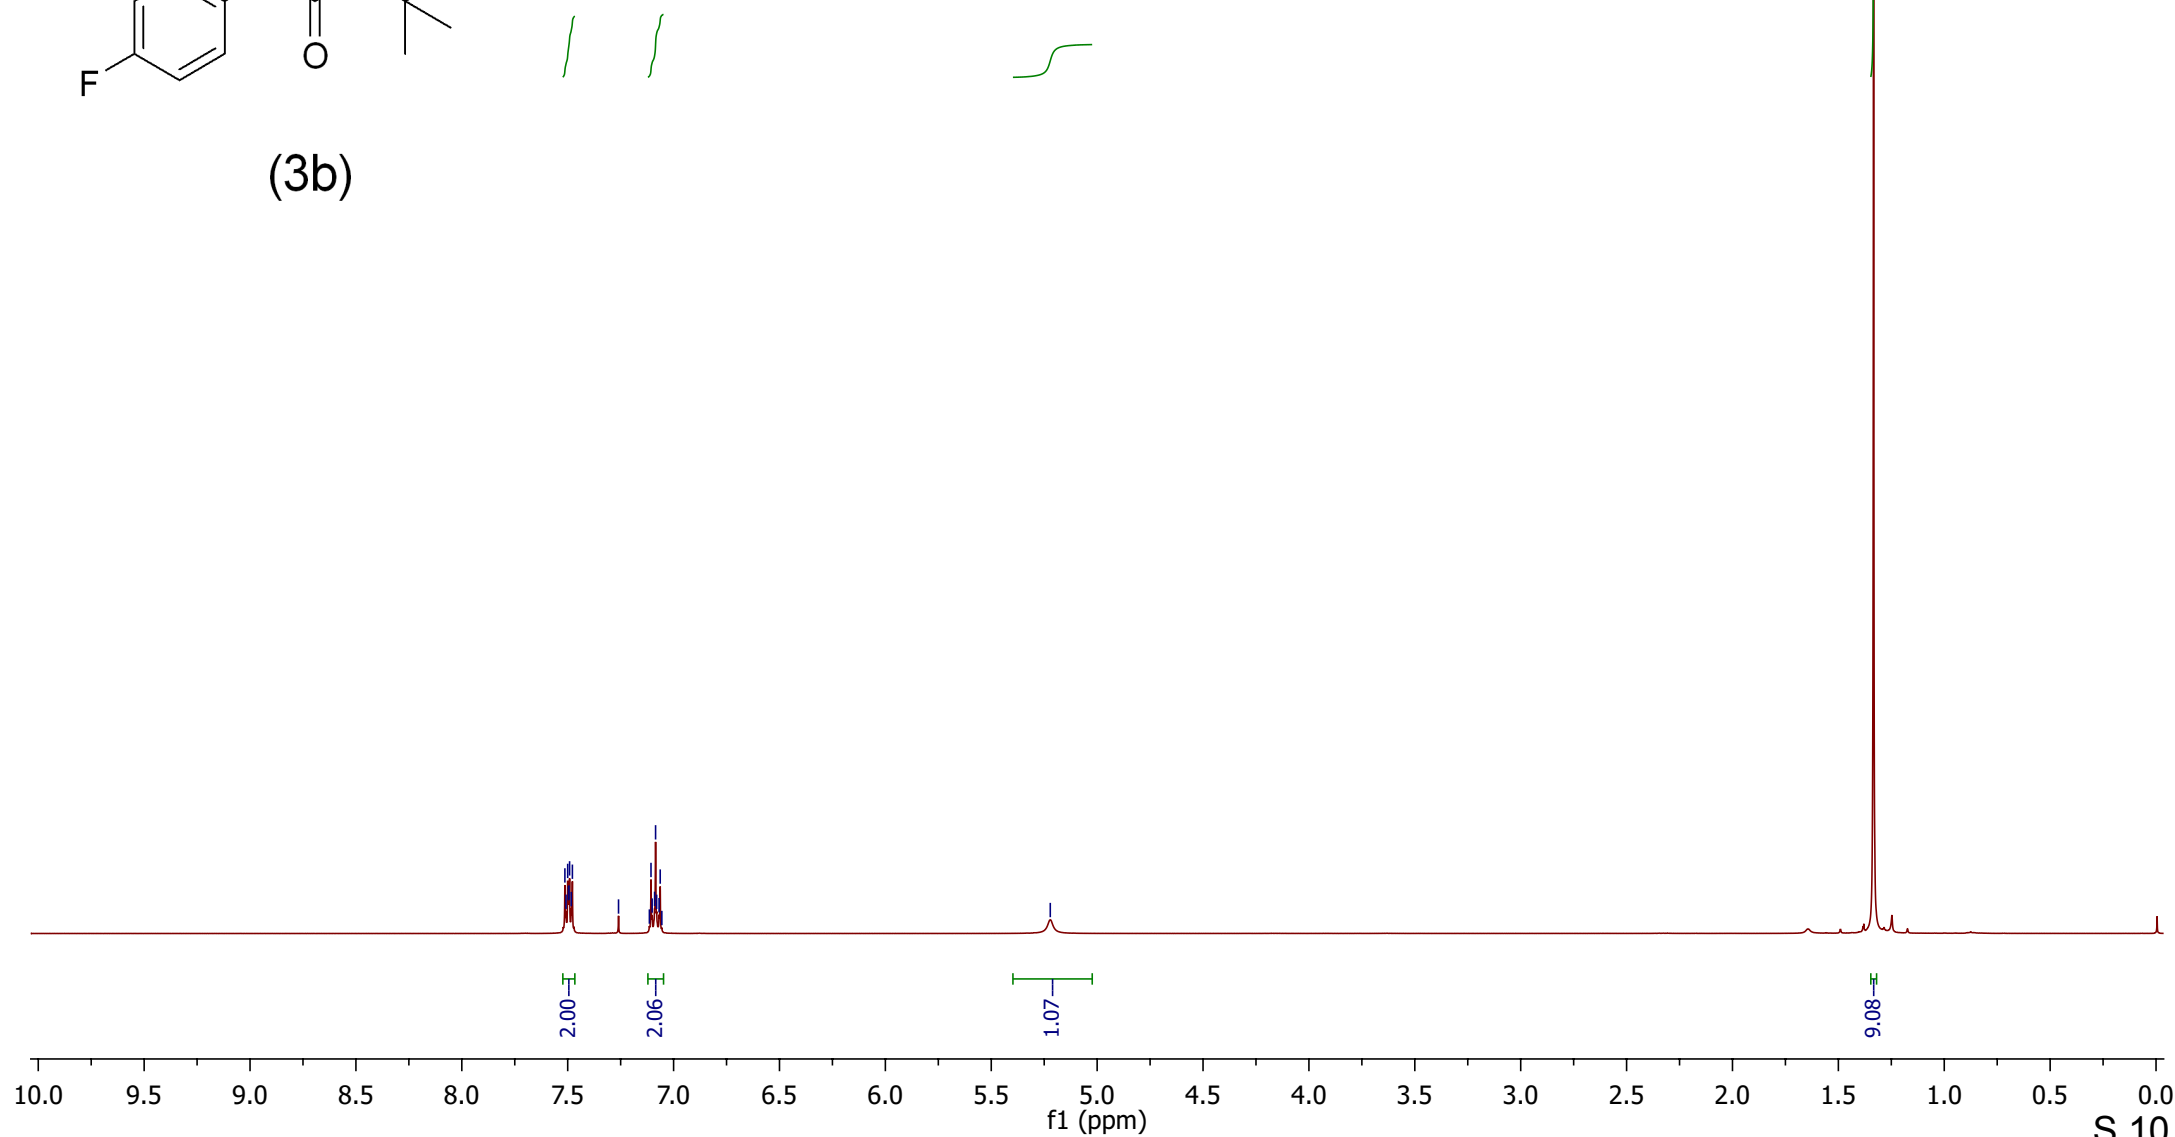

B series NMR  
B-05

164.632  
163.676  
162.149

137.519  
137.434

124.174  
124.141

116.413  
116.194

77.318  
77.000  
76.683

53.578

28.795

$^{13}\text{C}$  NMR (100 MHz,  $\text{CDCl}_3$ )

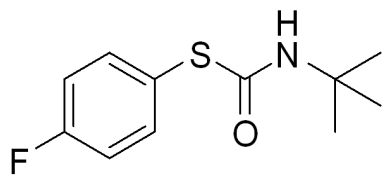

(3b)

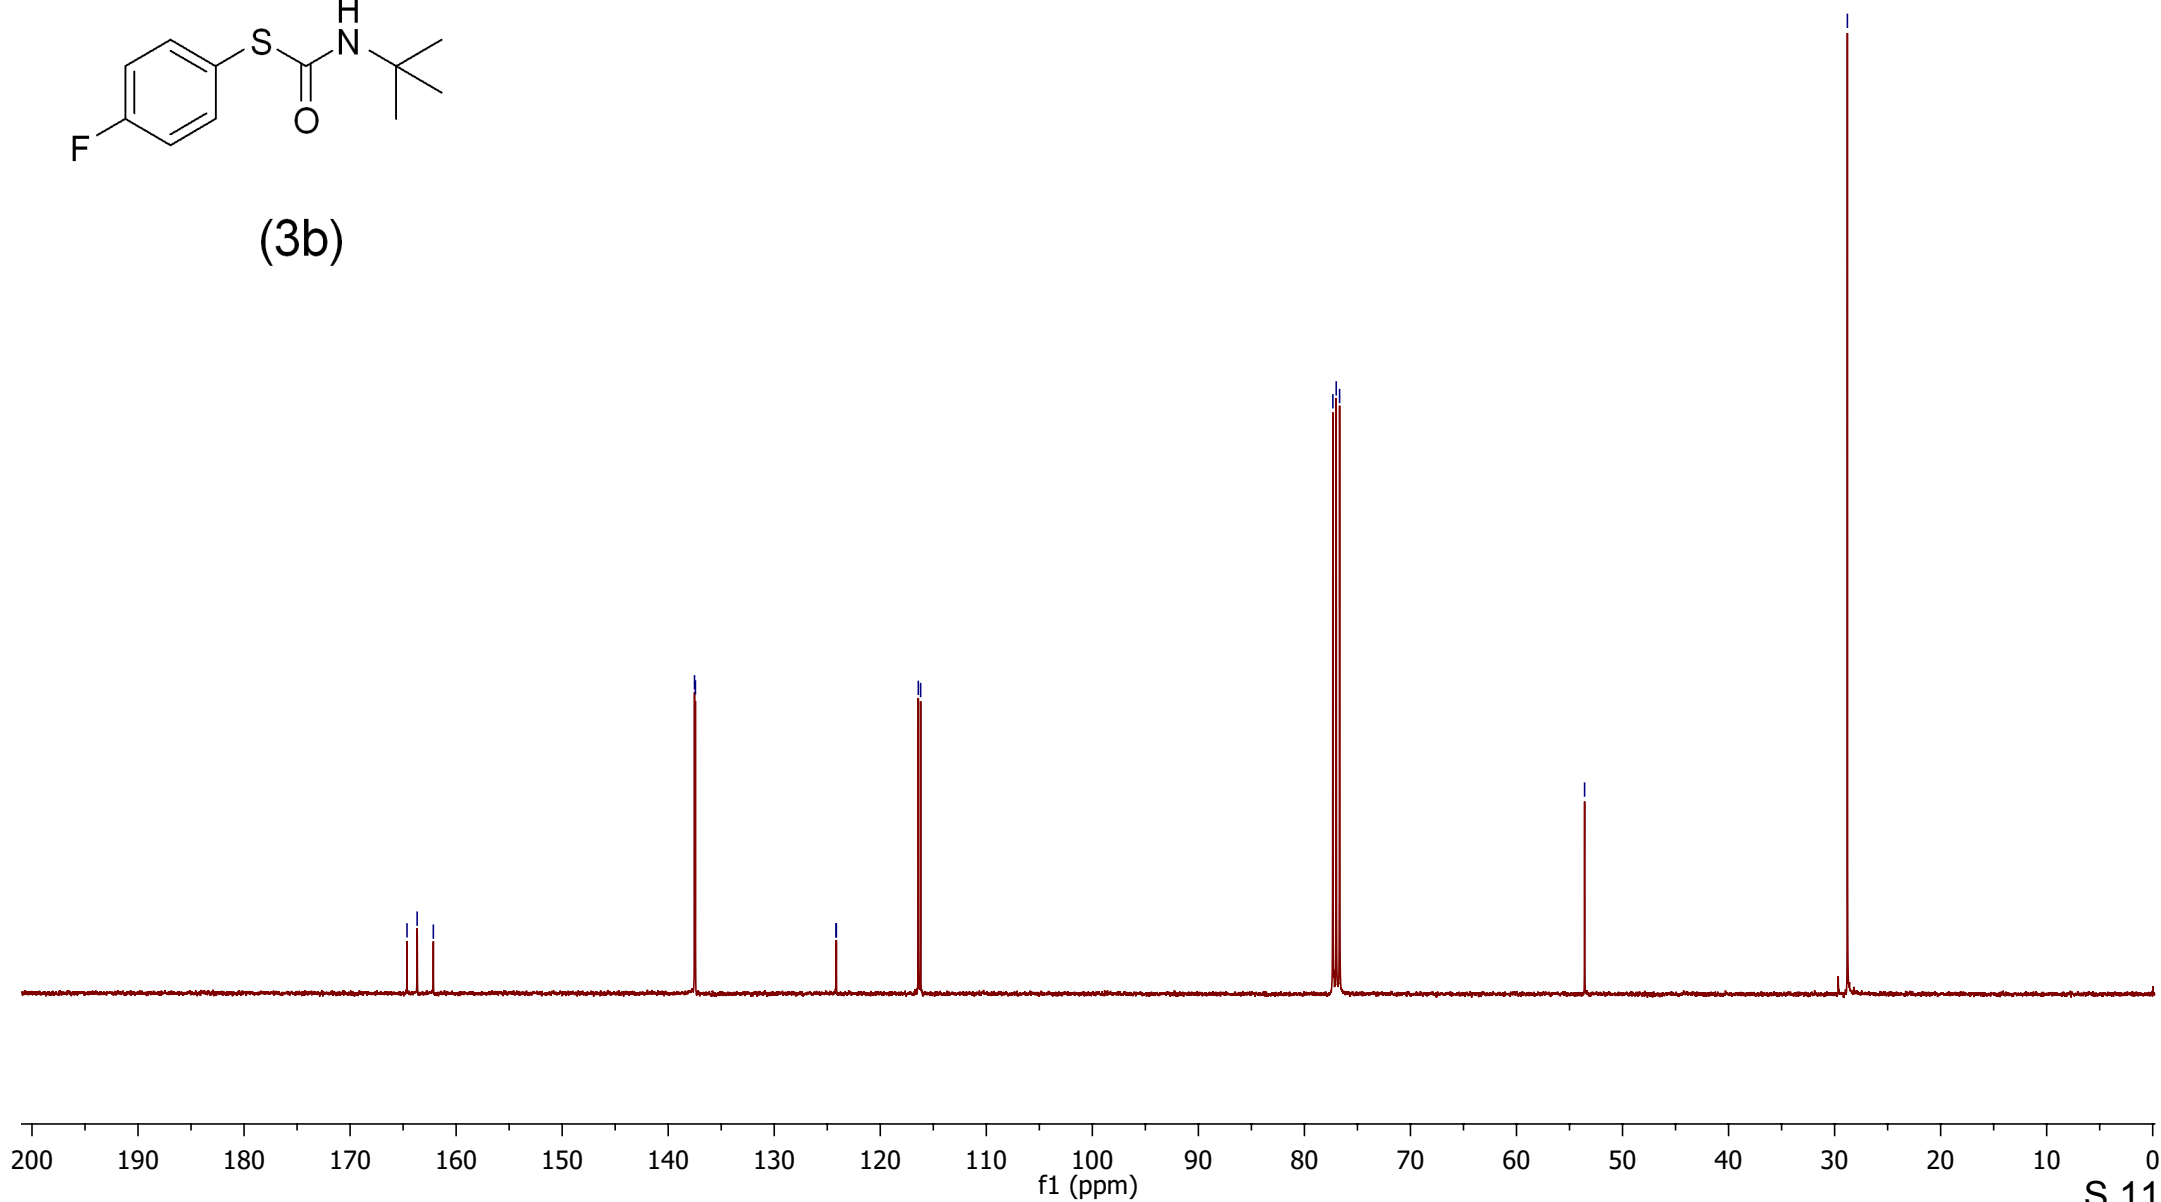

F-NMR  
B-05

$^{19}\text{F}$  NMR (376 MHz,  $\text{CDCl}_3$ )



(3b)

-111.42

10 0 -10 -20 -30 -40 -50 -60 -70 -80 -90 -100 -110 -120 -130 -140 -150 -160 -170 -180 -190 -200 -210  
f1 (ppm)



New NMR  
b-17

7.530  
7.523  
7.519  
7.507  
7.502  
7.496  
7.391  
7.385  
7.380  
7.368  
7.363  
7.357  
7.260

5.228

1.341

# <sup>1</sup>H NMR (400 MHz, CDCl<sub>3</sub>)

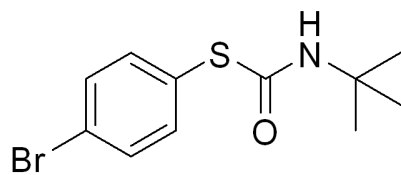

(3c)

10.0 9.5 9.0 8.5 8.0 7.5 7.0 6.5 6.0 5.5 5.0 4.5 4.0 3.5 3.0 2.5 2.0 1.5 1.0 0.5 0.0  
f1 (ppm)

1.00

9.12

New NMR  
b-17

$^{13}\text{C}$  NMR (100 MHz,  $\text{CDCl}_3$ )

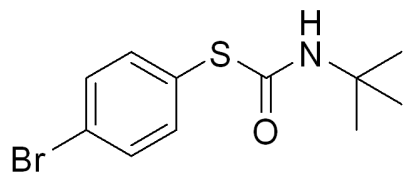

(3c)

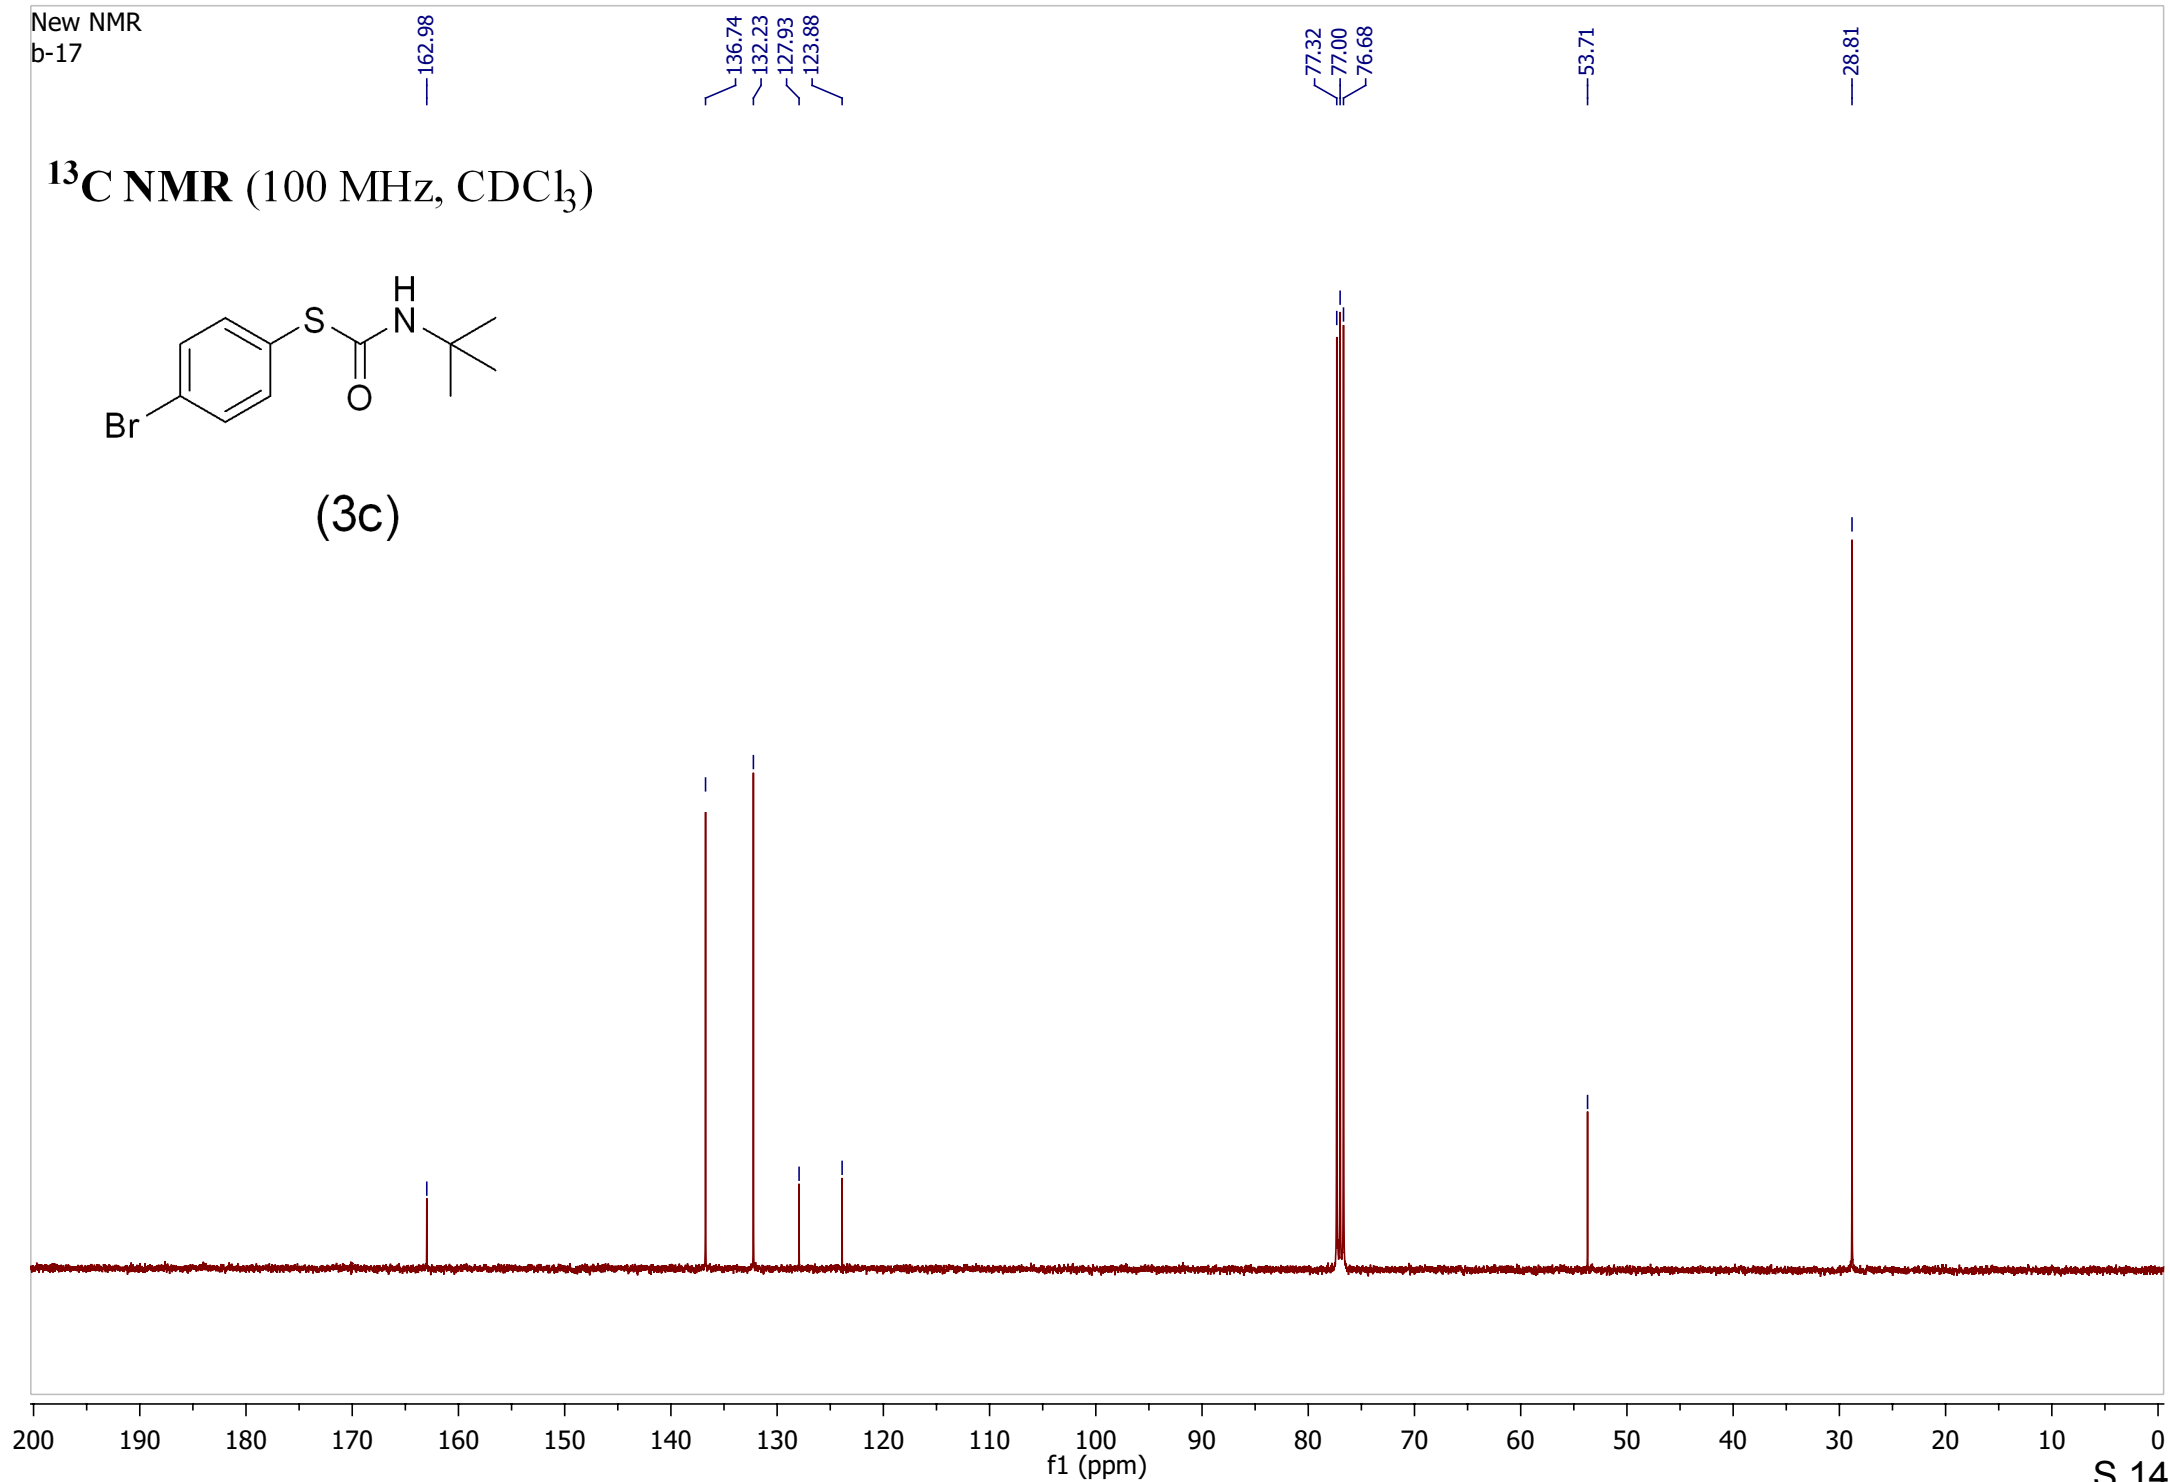

7.461  
7.453  
7.448  
7.436  
7.431  
7.423  
7.260  
6.935  
6.928  
6.922  
6.911  
6.905  
6.898

5.223

3.807

1.301

# <sup>1</sup>H NMR (400 MHz, CDCl<sub>3</sub>)

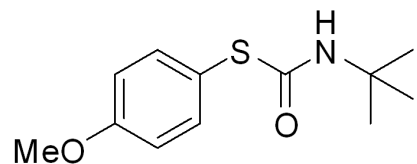

(3d)

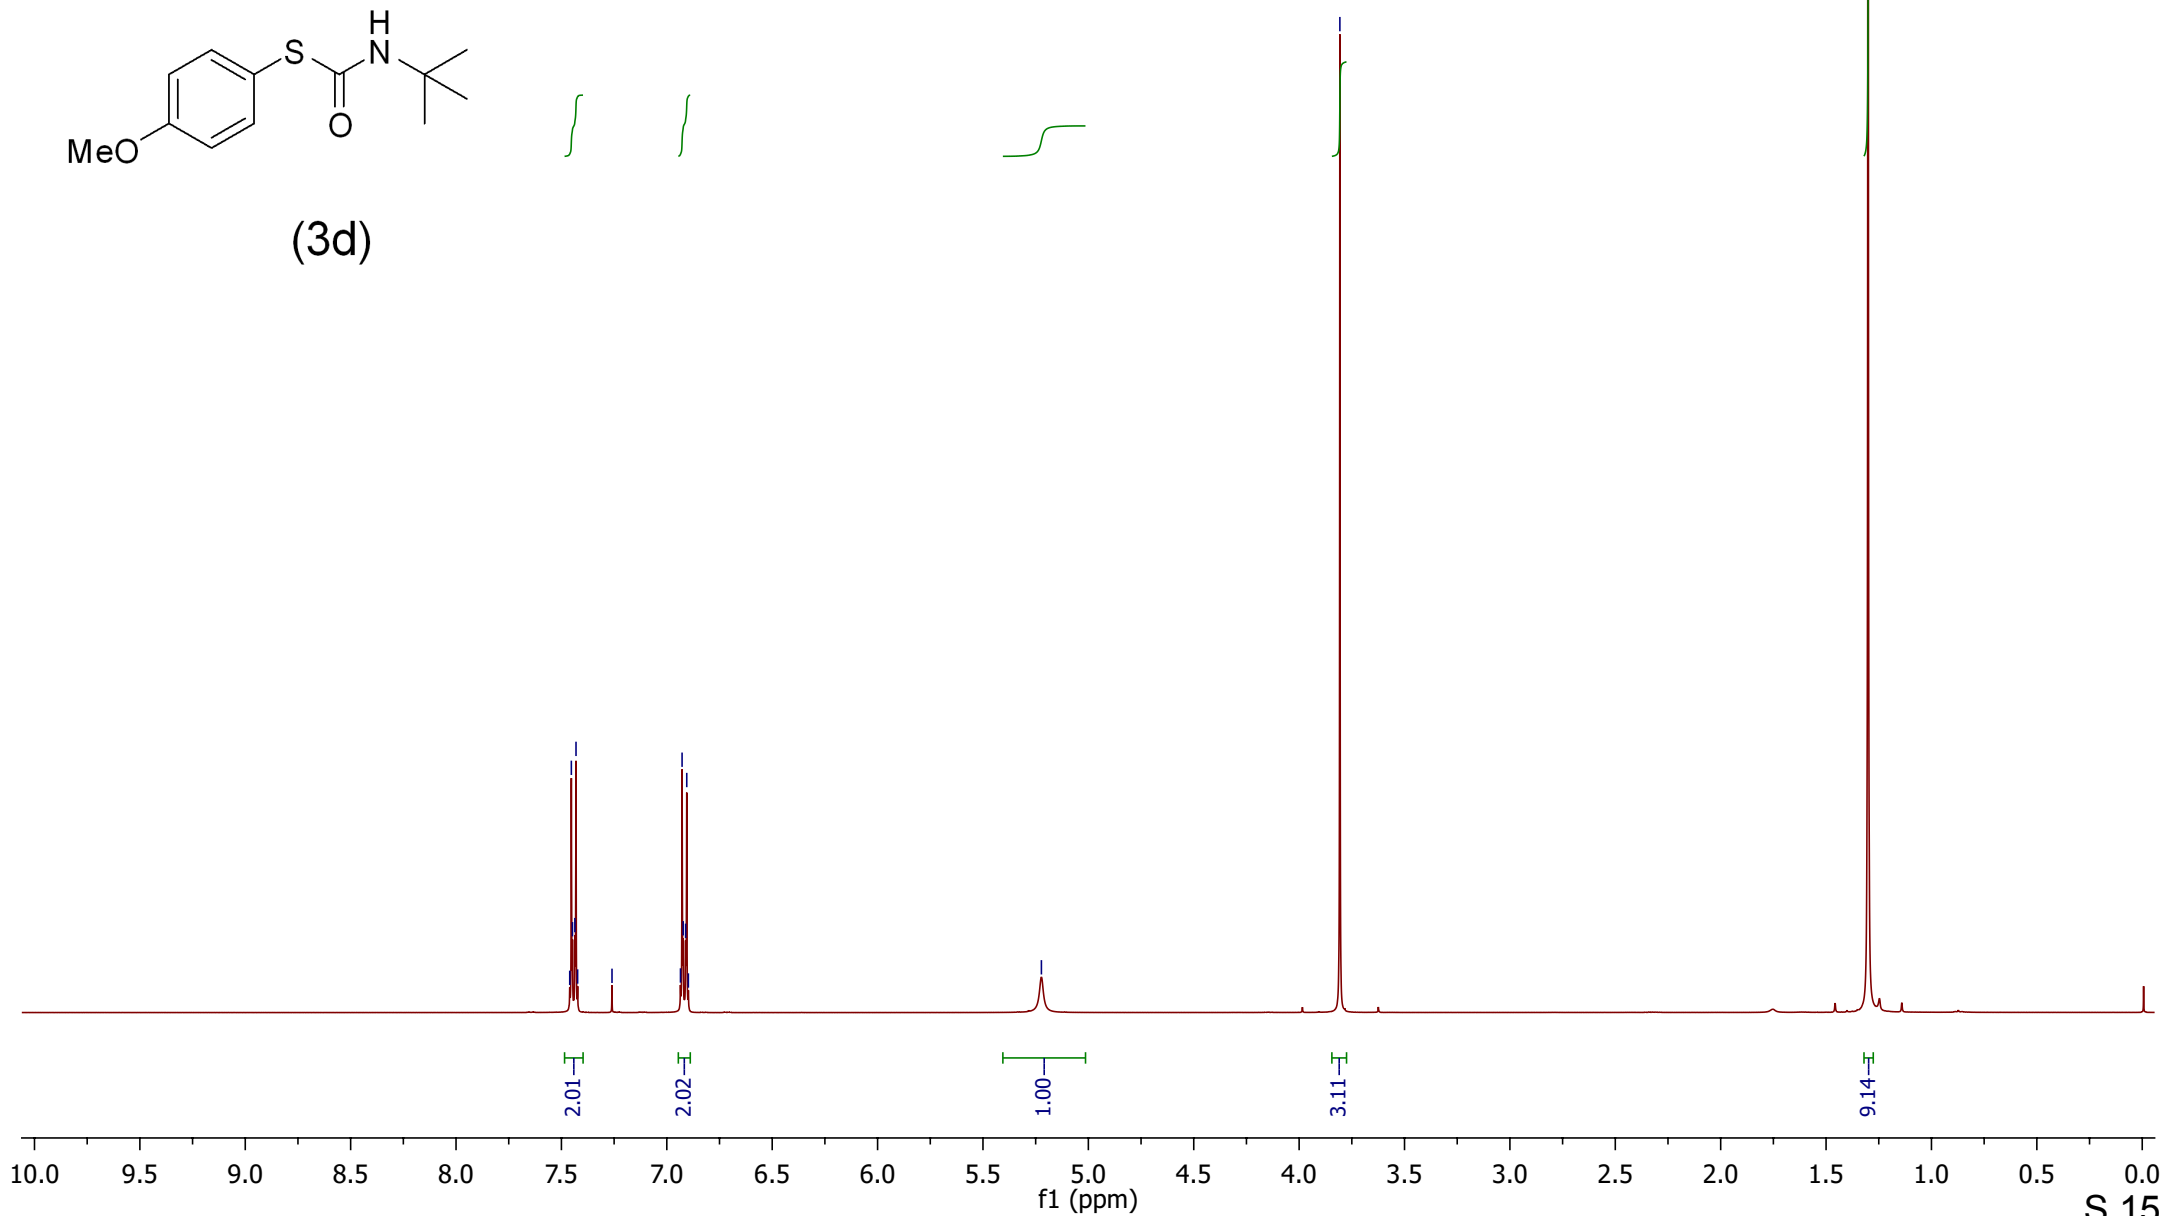

164.8

160.58

137.08

119.74

114.80

77.32

77.00

76.68

55.27

53.23

28.72

# $^{13}\text{C}$ NMR (100 MHz, $\text{CDCl}_3$ )

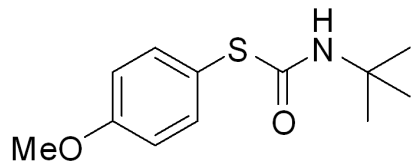

(3d)

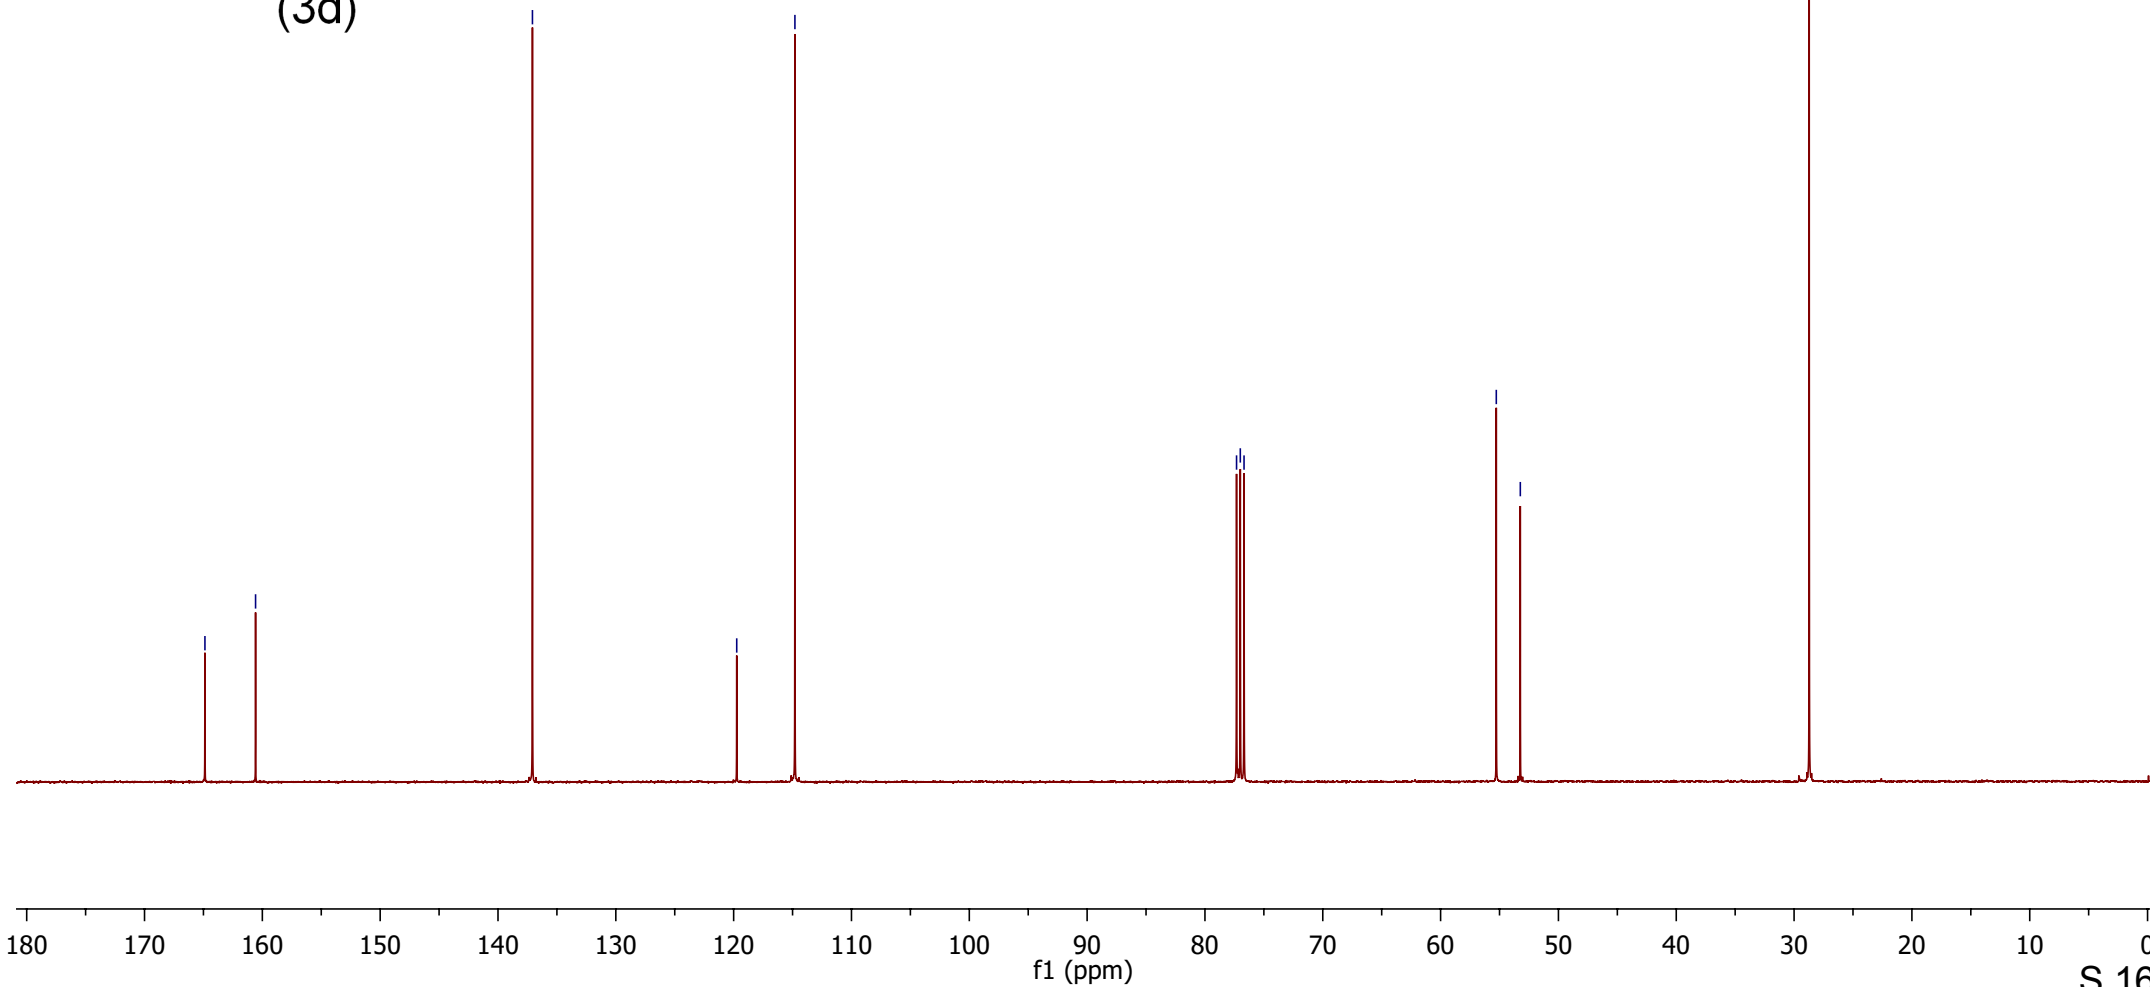

New NMR  
b-02

7.544  
7.541  
7.539  
7.536  
7.531  
7.527  
7.524  
7.520  
7.417  
7.407  
7.404  
7.401  
7.399  
7.396  
7.395  
7.391  
7.387  
7.260

5.193

1.323

<sup>1</sup>H NMR (400 MHz, CDCl<sub>3</sub>)

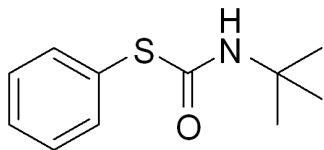

(3e)

||

~

10.0 9.5 9.0 8.5 8.0 7.5 7.0 6.5 6.0 5.5 5.0 4.5 4.0 3.5 3.0 2.5 2.0 1.5 1.0 0.5 0.0  
f1 (ppm)

2.00  
3.11

1.07

9.11

—163.97

—135.33

129.28

129.19

128.97

77.32

77.00

76.68

—53.43

—28.76

<sup>13</sup>C NMR (100 MHz, CDCl<sub>3</sub>)

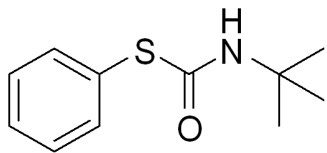

(3e)

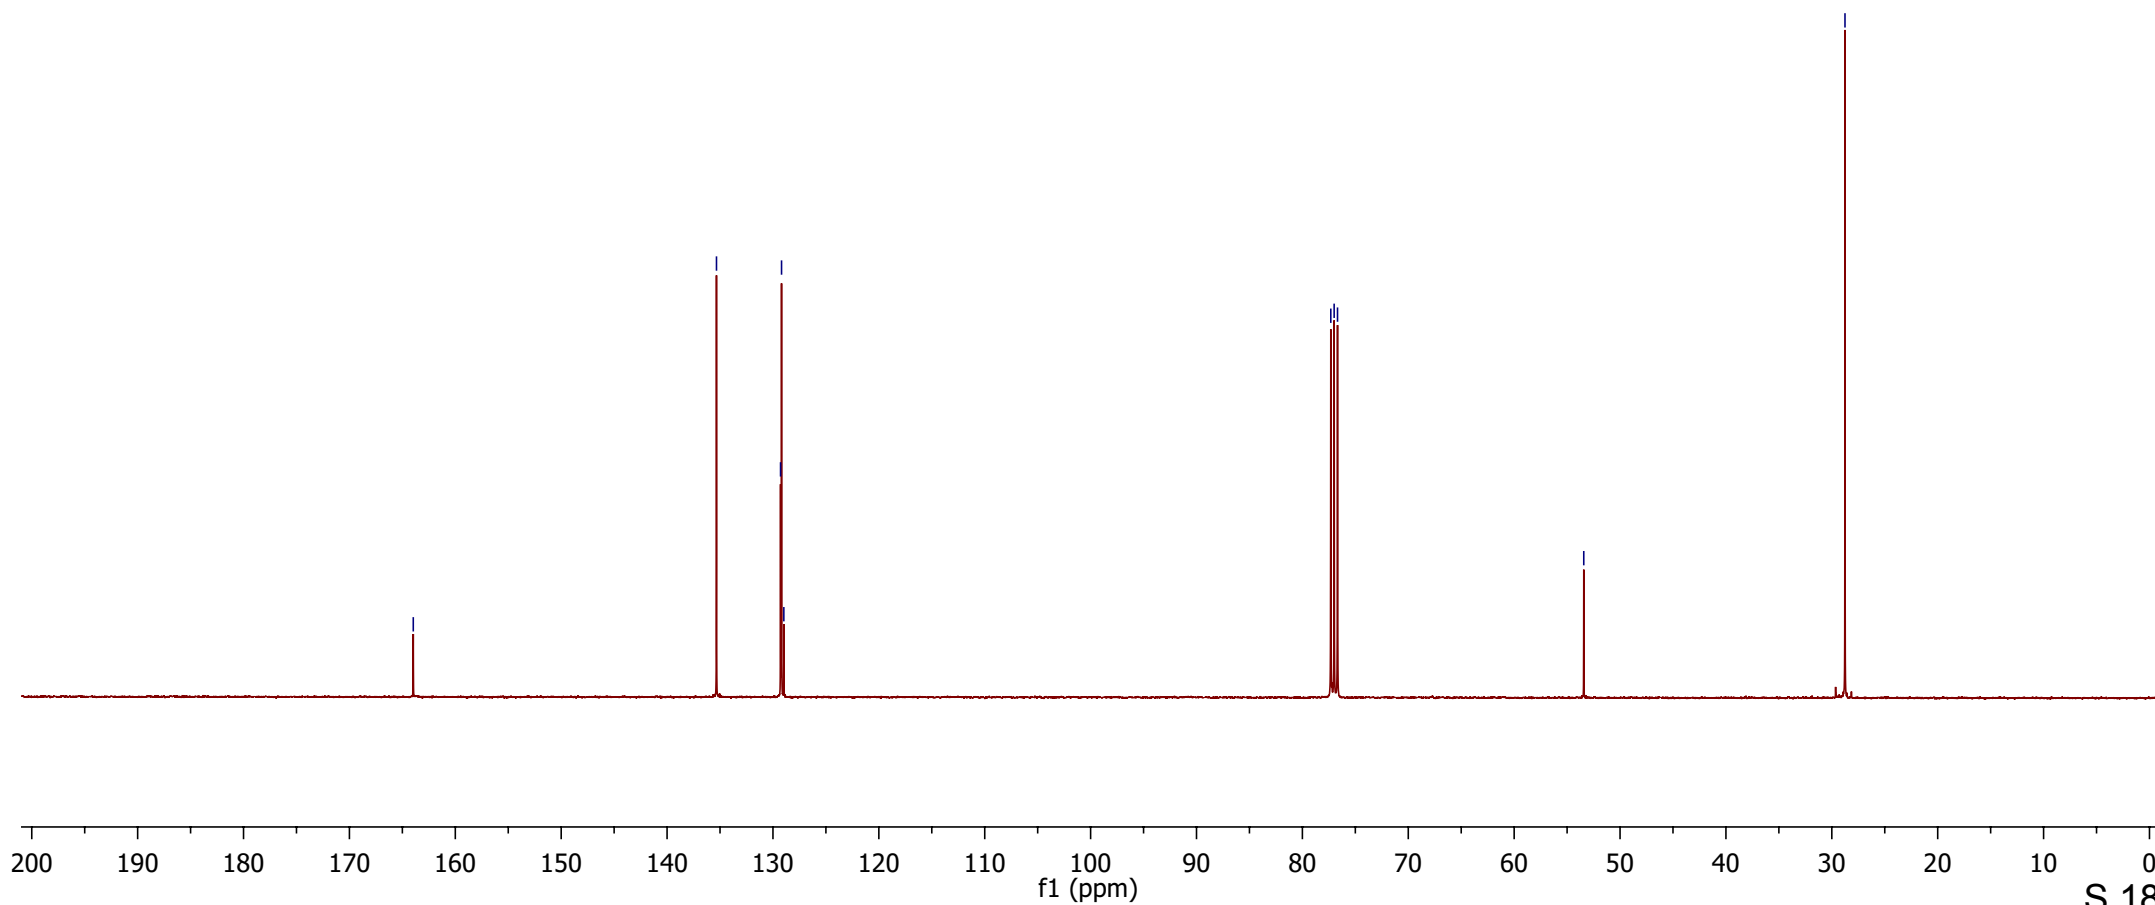

New NMR  
b-21

8.060  
8.056  
7.872  
7.857  
7.851  
7.844  
7.840  
7.834  
7.827  
7.590  
7.585  
7.568  
7.564  
7.534  
7.529  
7.520  
7.510  
7.505  
7.260

$^1\text{H}$  NMR (400 MHz,  $\text{CDCl}_3$ )

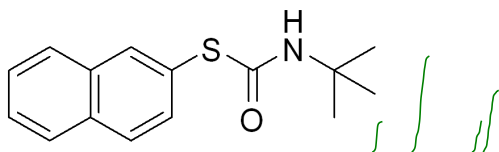

(3f)

5.266

1.332

10.0 9.5 9.0 8.5 8.0 7.5 7.0 6.5 6.0 5.5 5.0 4.5 4.0 3.5 3.0 2.5 2.0 1.5 1.0 0.5 0.0  
f1 (ppm)

1.00

3.13

1.03

2.02

1.03

9.04

135.06  
133.49  
133.20  
131.69  
128.79  
127.94  
127.69  
127.07  
126.51  
126.32

77.32  
77.00  
76.68

53.50

28.79

<sup>13</sup>C NMR (100 MHz, CDCl<sub>3</sub>)

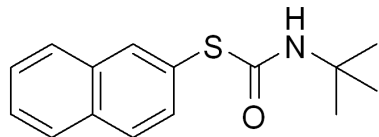

(3f)

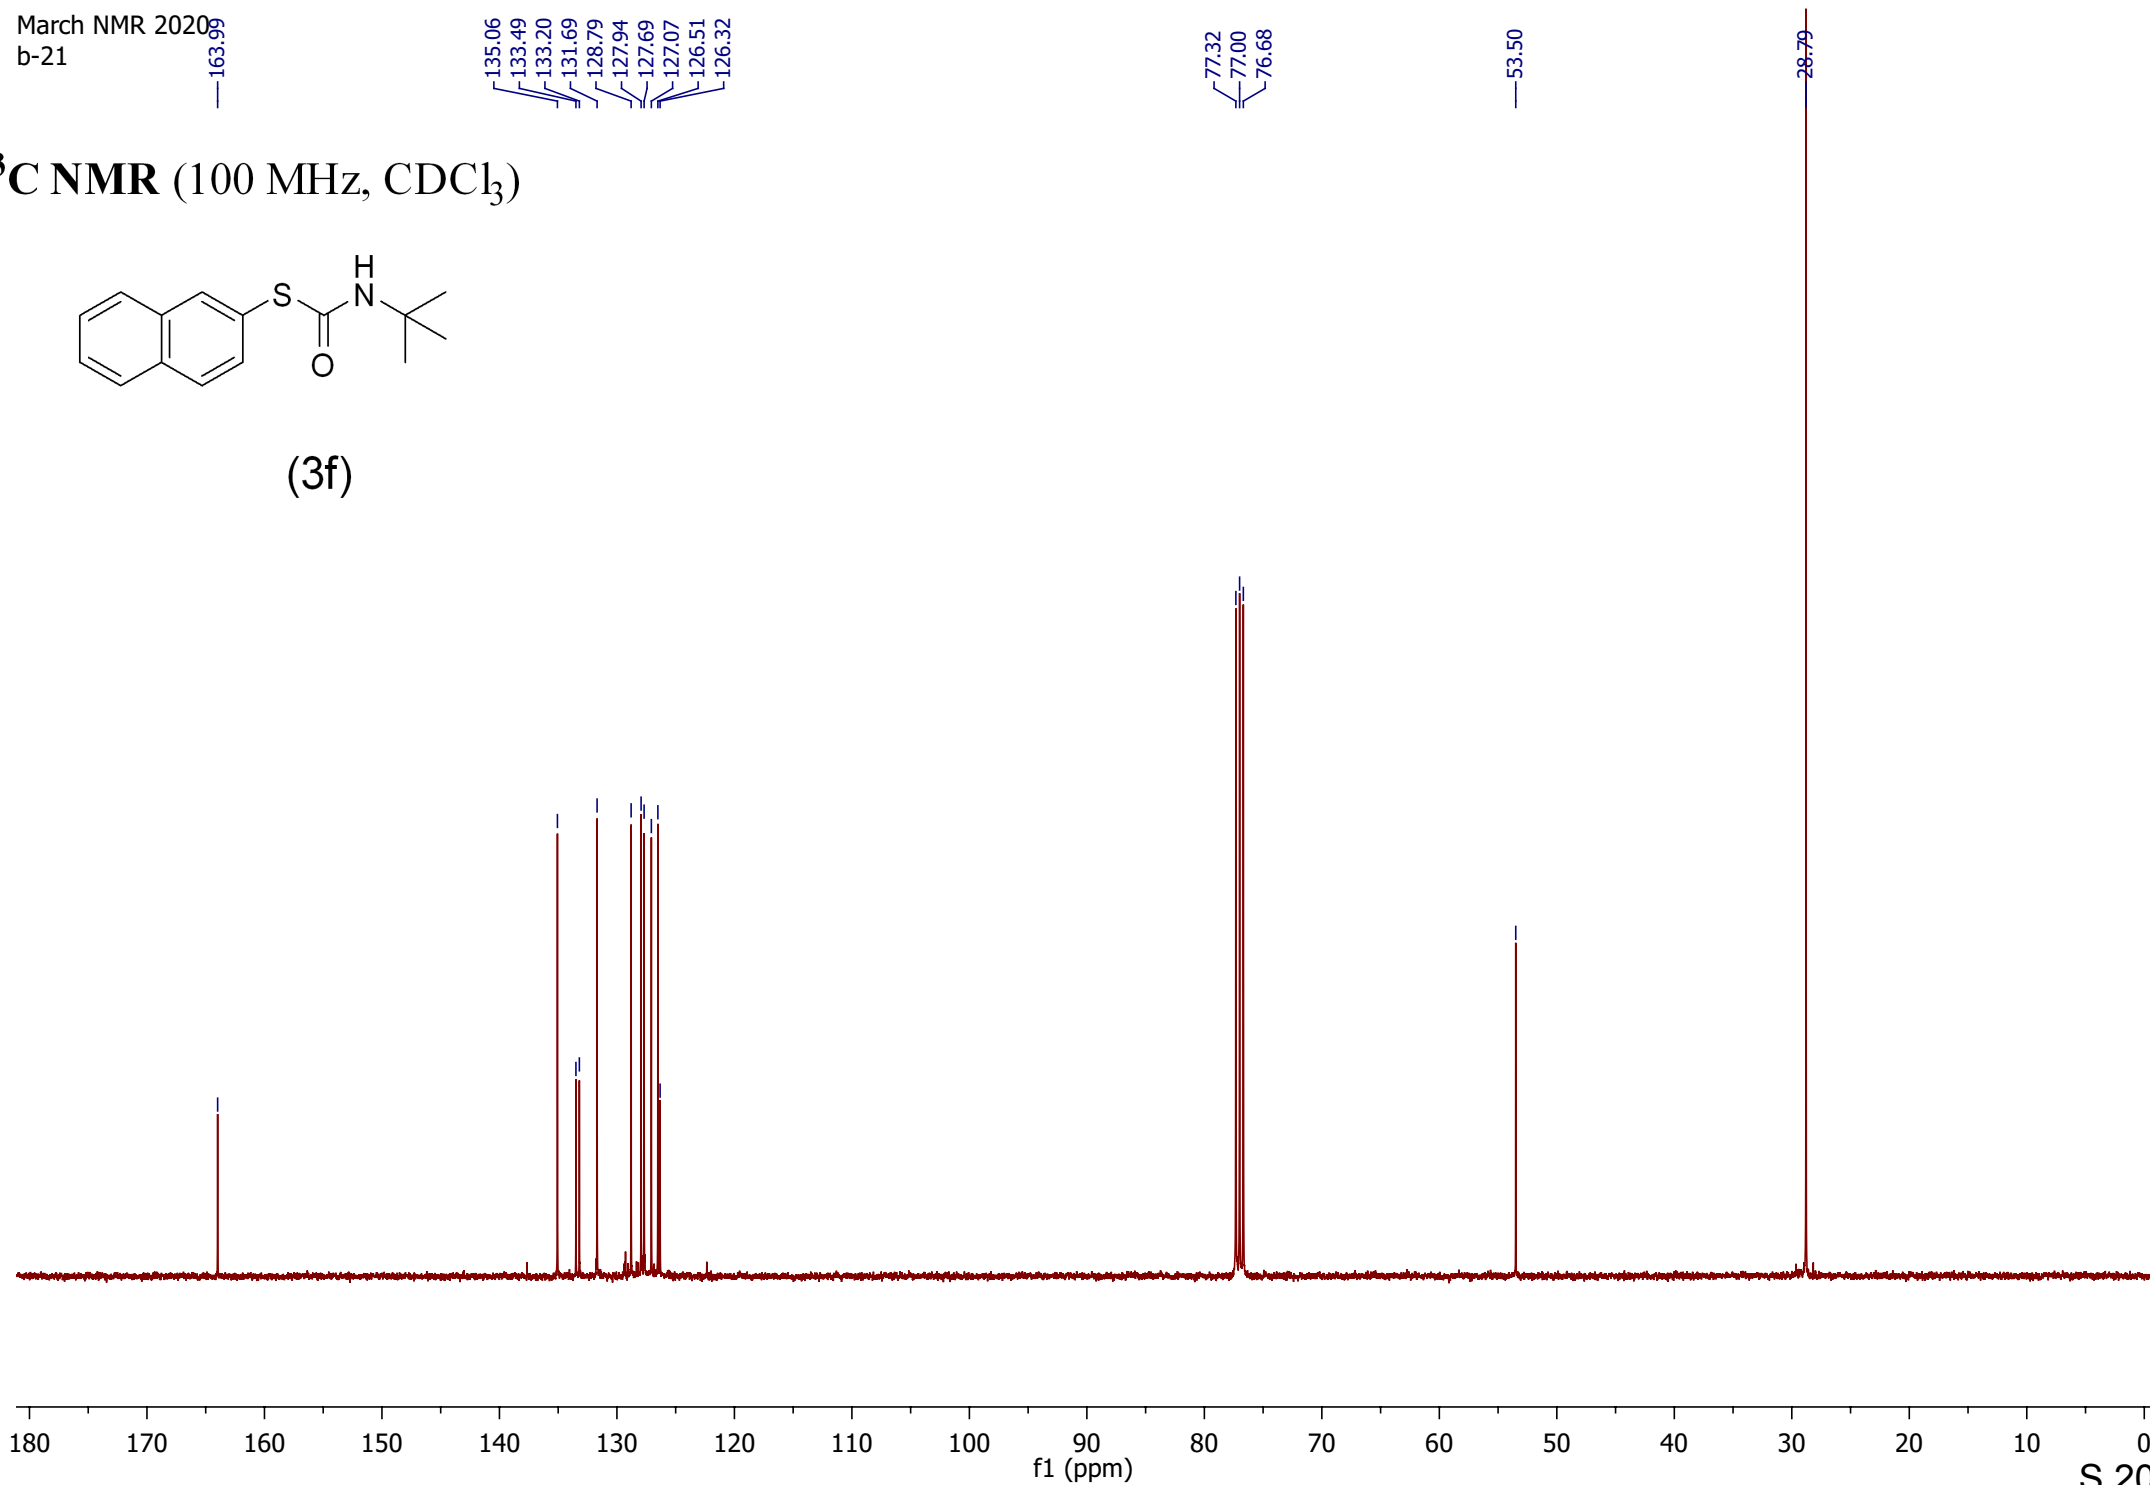



7.565  
7.560  
7.551  
7.542  
7.429  
7.419  
7.413  
7.408  
7.405  
7.403  
7.397  
7.394  
7.260

5.182

3.739  
3.720

1.897  
1.874  
1.629  
1.584  
1.553  
1.544  
1.363  
1.334  
1.302  
1.272  
1.173  
1.165  
1.144  
1.113  
1.083  
1.056

# <sup>1</sup>H NMR (400 MHz, CDCl<sub>3</sub>)

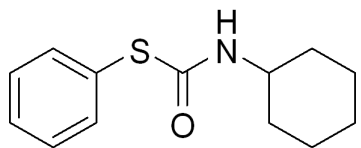

(3g)

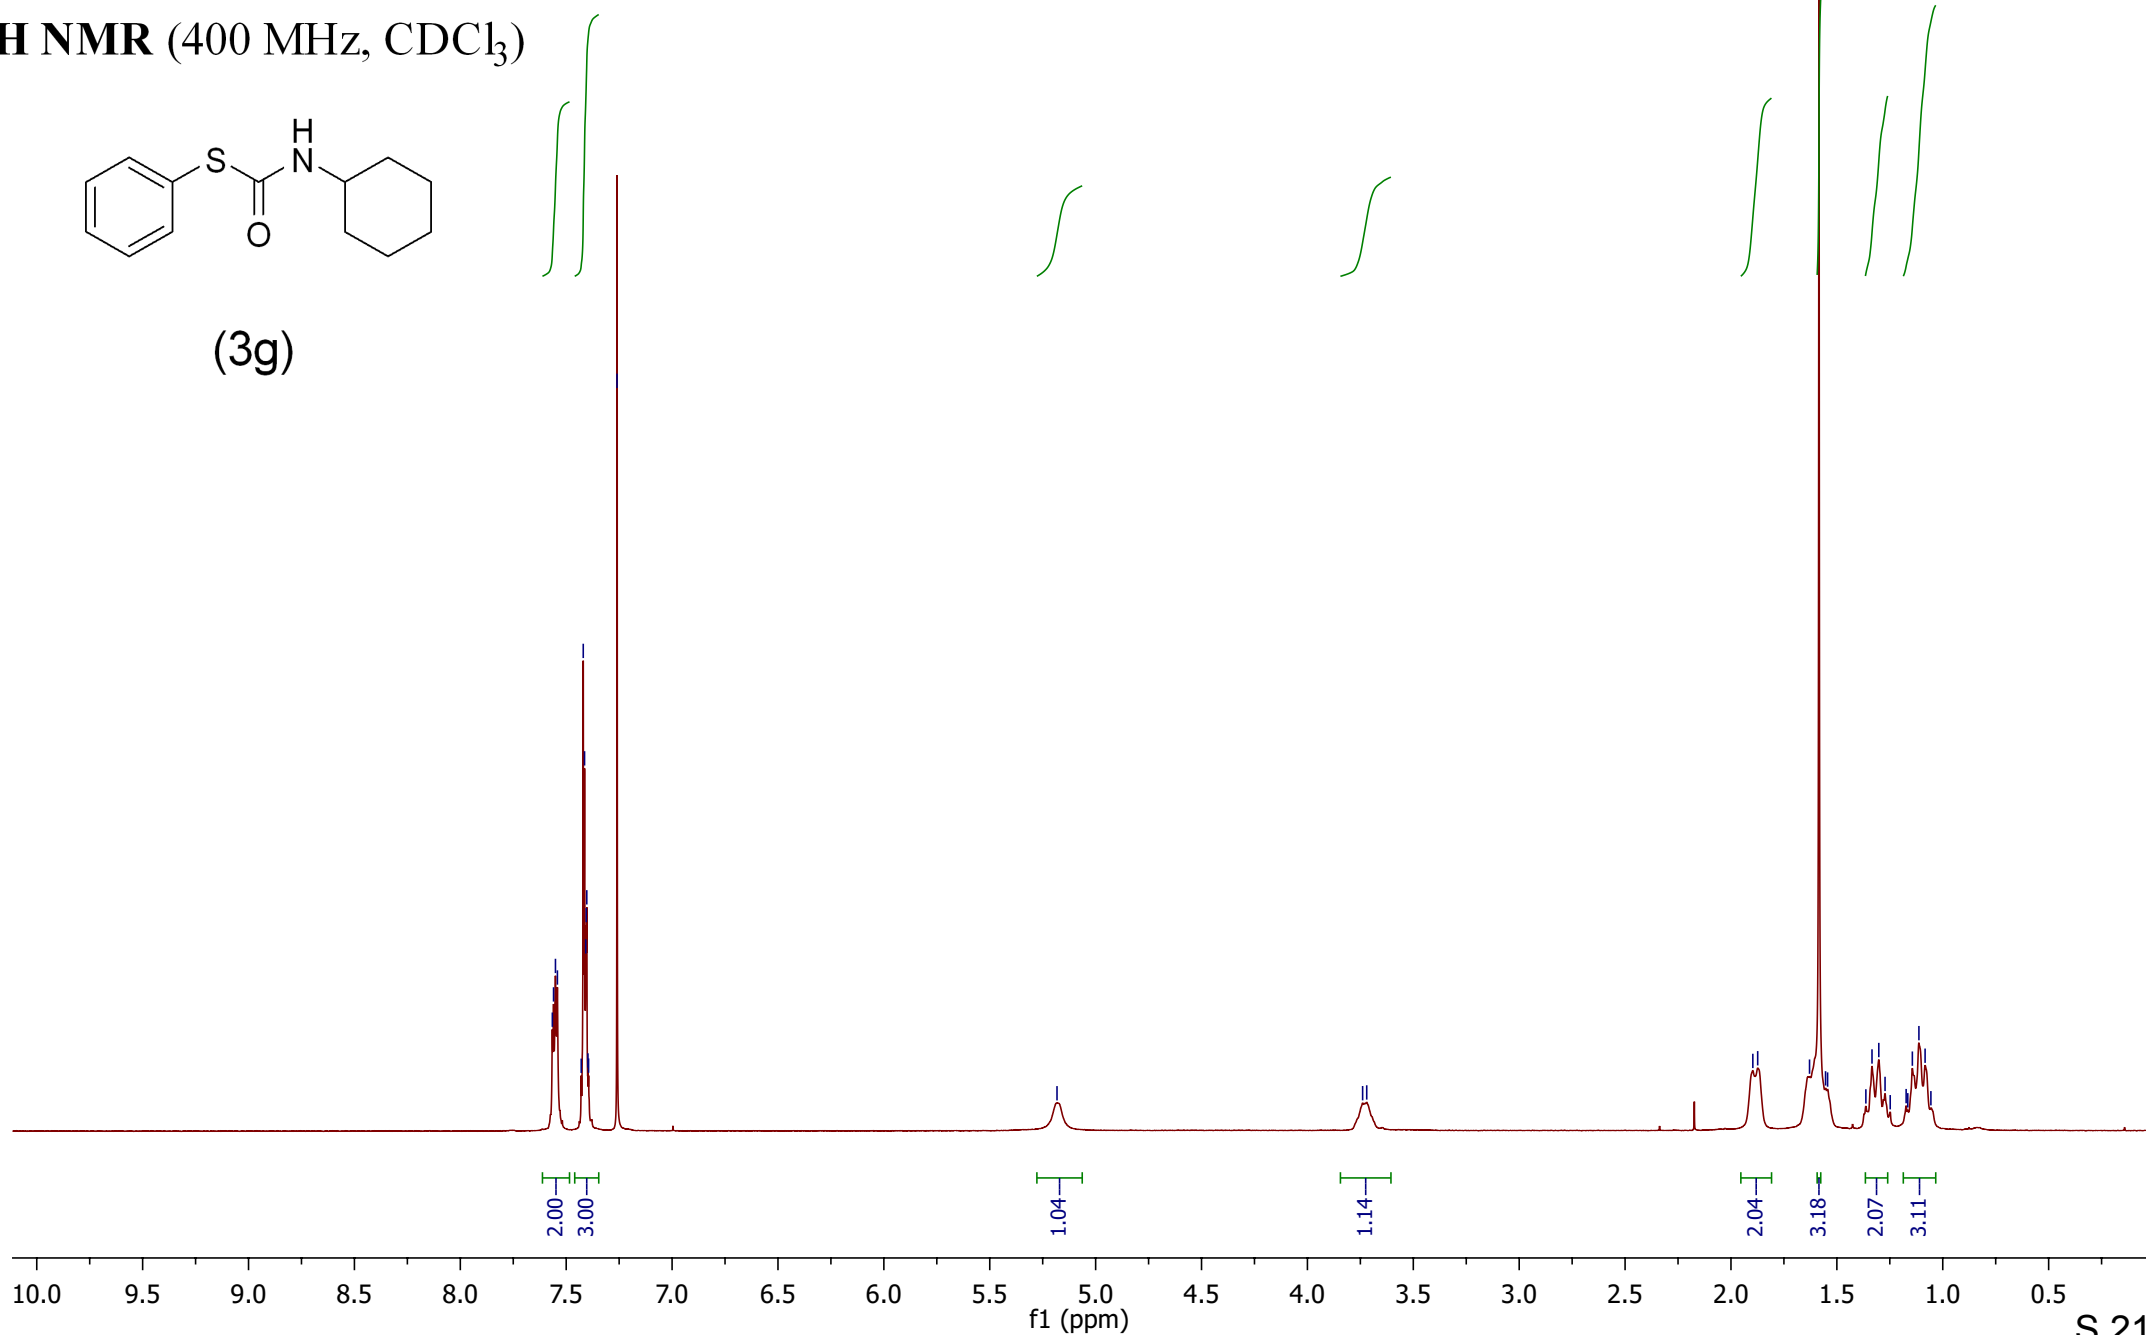

164.93

135.41

129.55

129.39

128.81

77.32

77.00

76.68

50.47

32.83

25.32

24.53

# $^{13}\text{C}$ NMR (100 MHz, $\text{CDCl}_3$ )

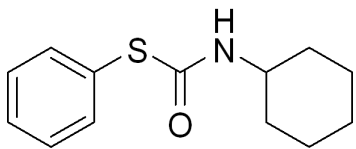

(3g)

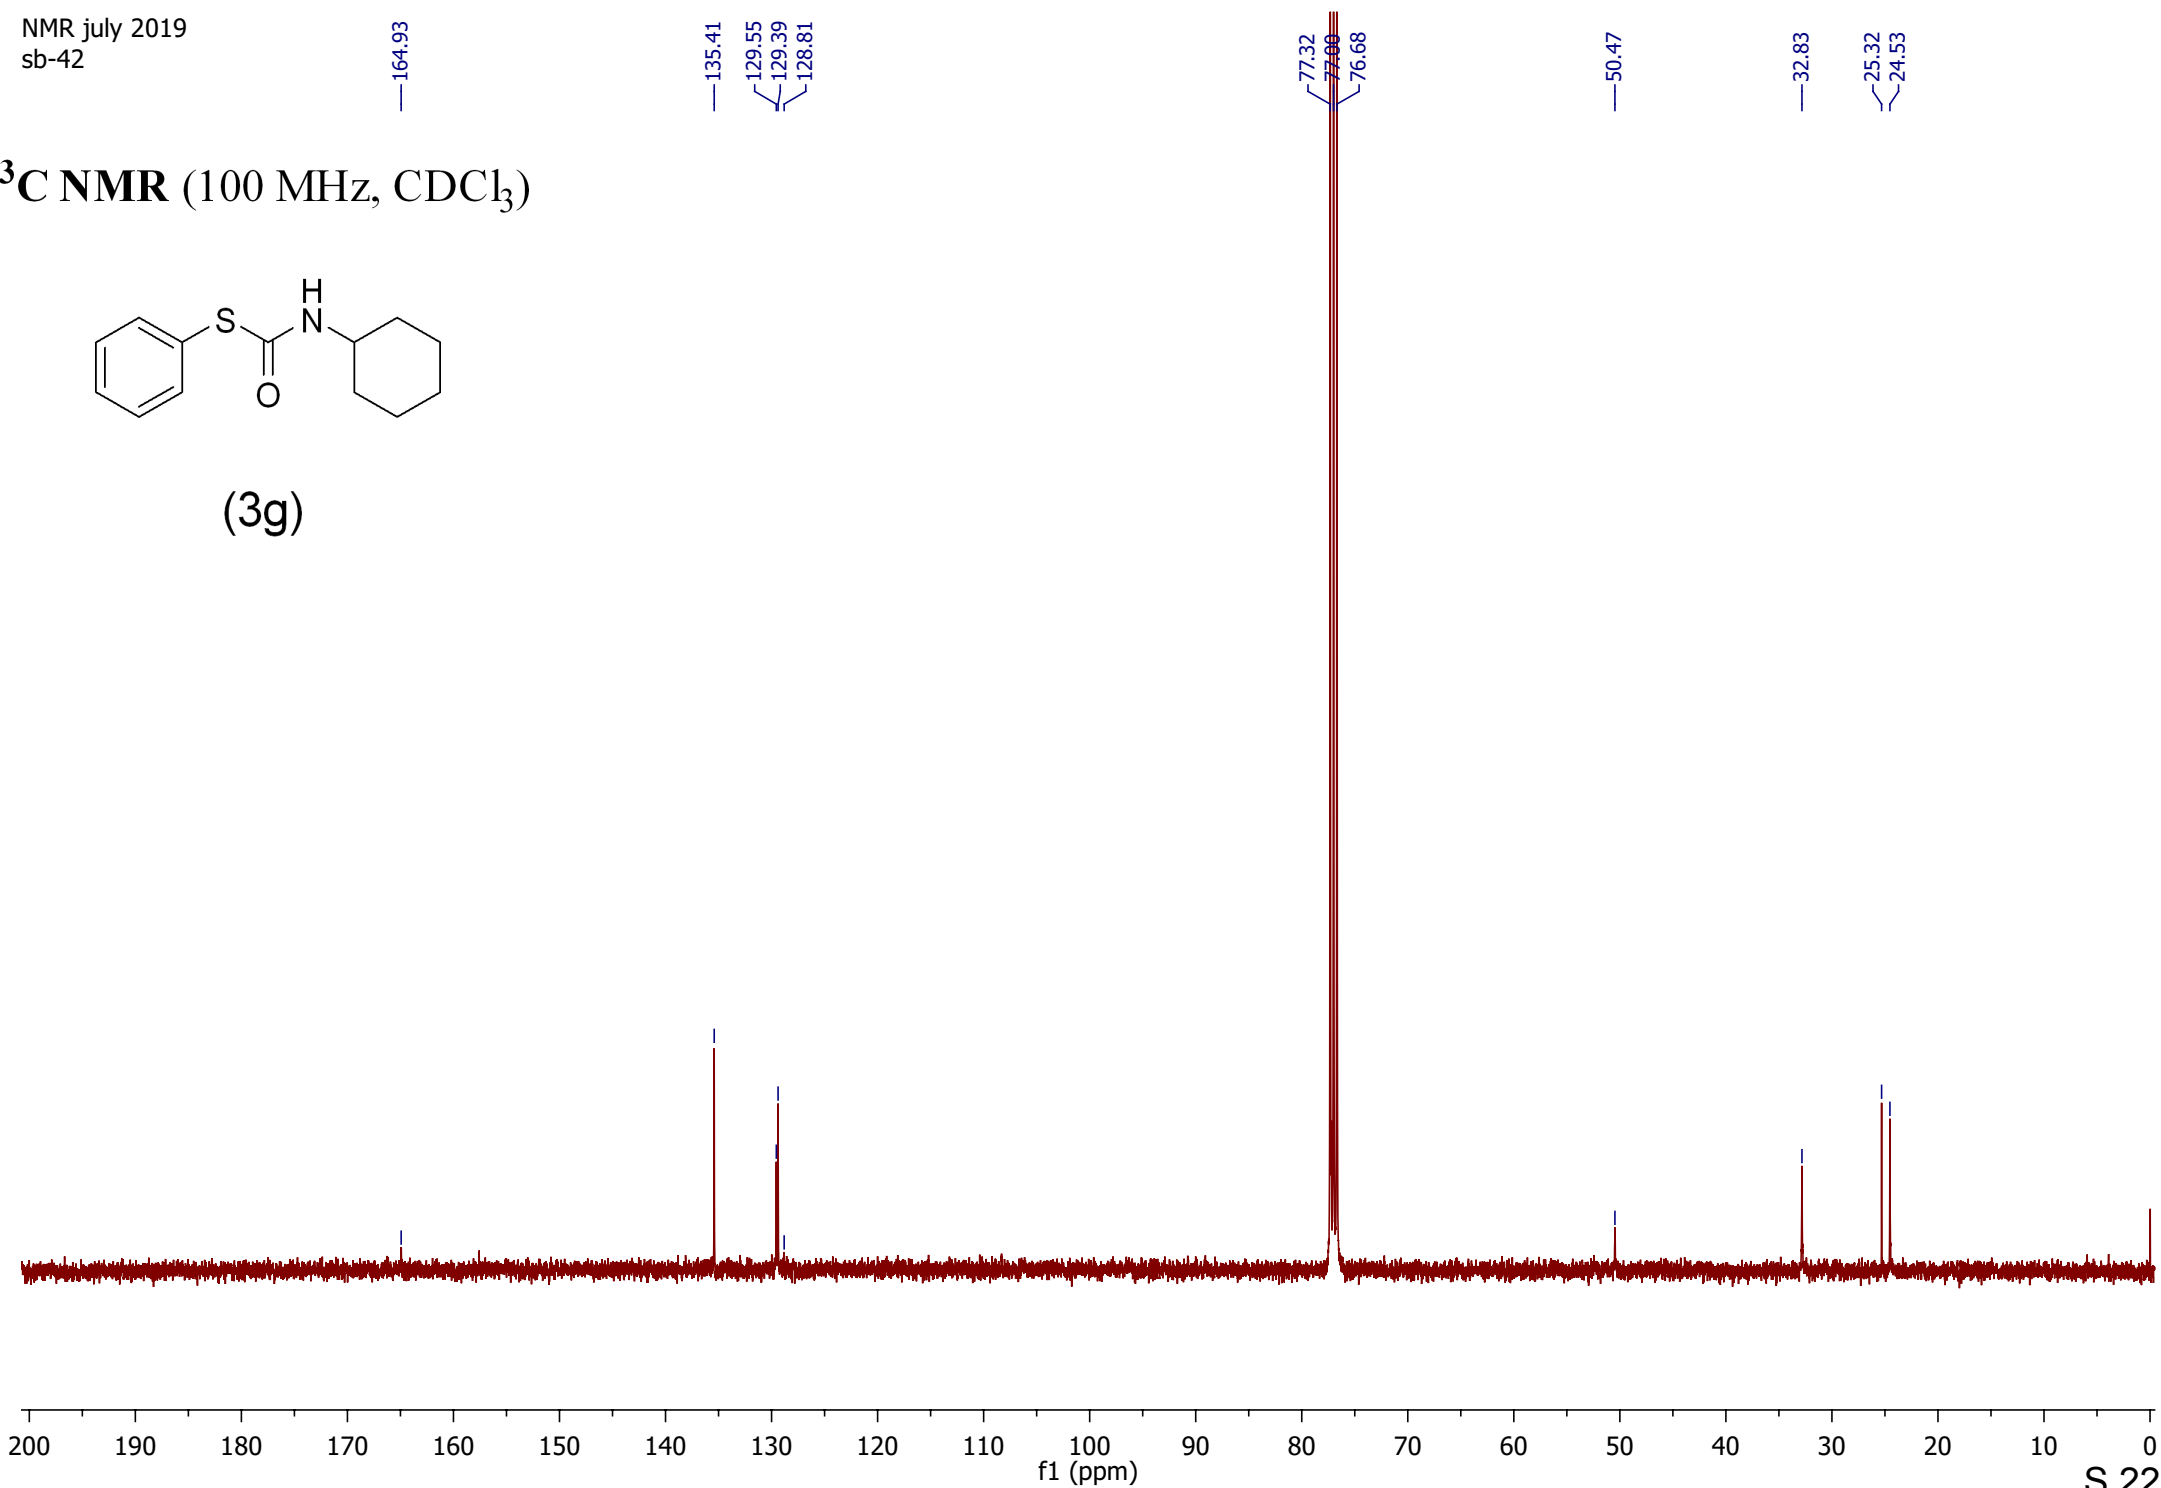

B series mahesh  
B-06

7.528  
7.514  
7.506  
7.493  
7.260  
7.111  
7.090  
7.069

5.255

3.755  
3.729  
3.720  
3.711

1.914  
1.890  
1.670  
1.637  
1.590  
1.558  
1.333  
1.303  
1.273  
1.151  
1.129  
1.107

$^1\text{H}$  NMR (400 MHz,  $\text{CDCl}_3$ )

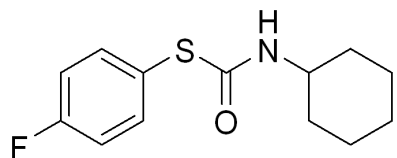

(3h)

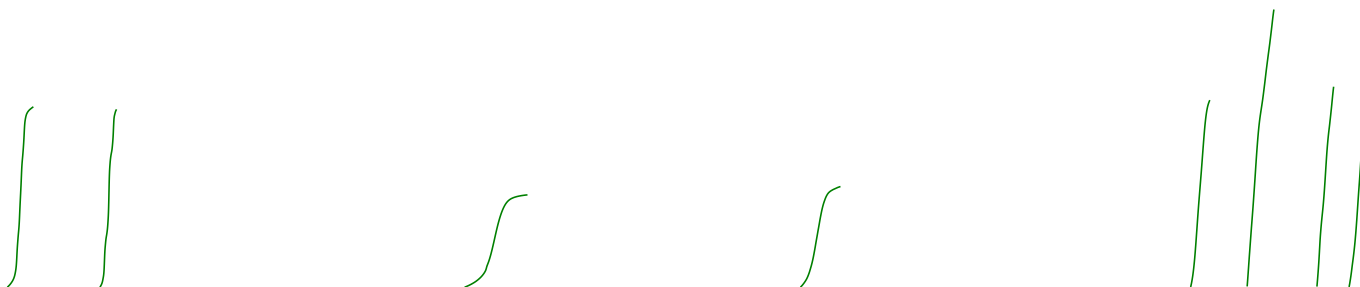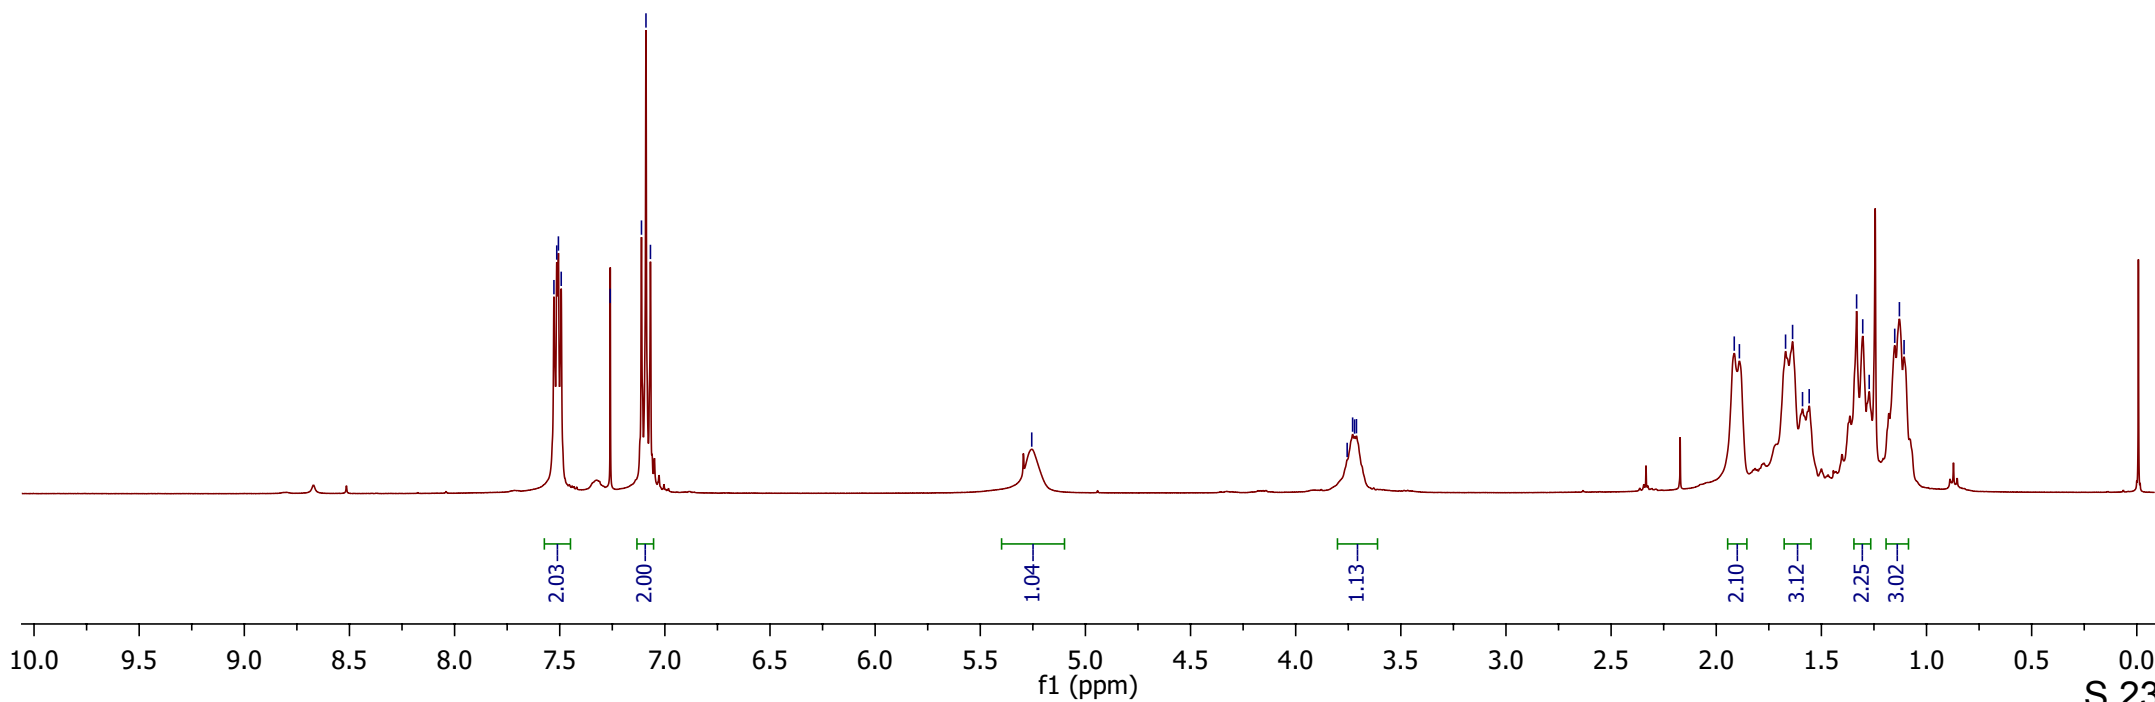

B series NMR  
B-06

164.71  
164.56  
162.23

137.52  
137.44

123.97

116.54  
116.32

77.32  
77.00  
76.68

50.68

32.87

25.28  
24.59

$^{13}\text{C}$  NMR (100 MHz,  $\text{CDCl}_3$ )

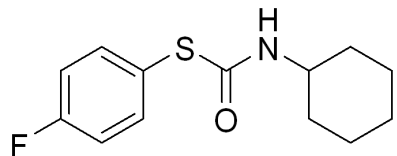

(3h)

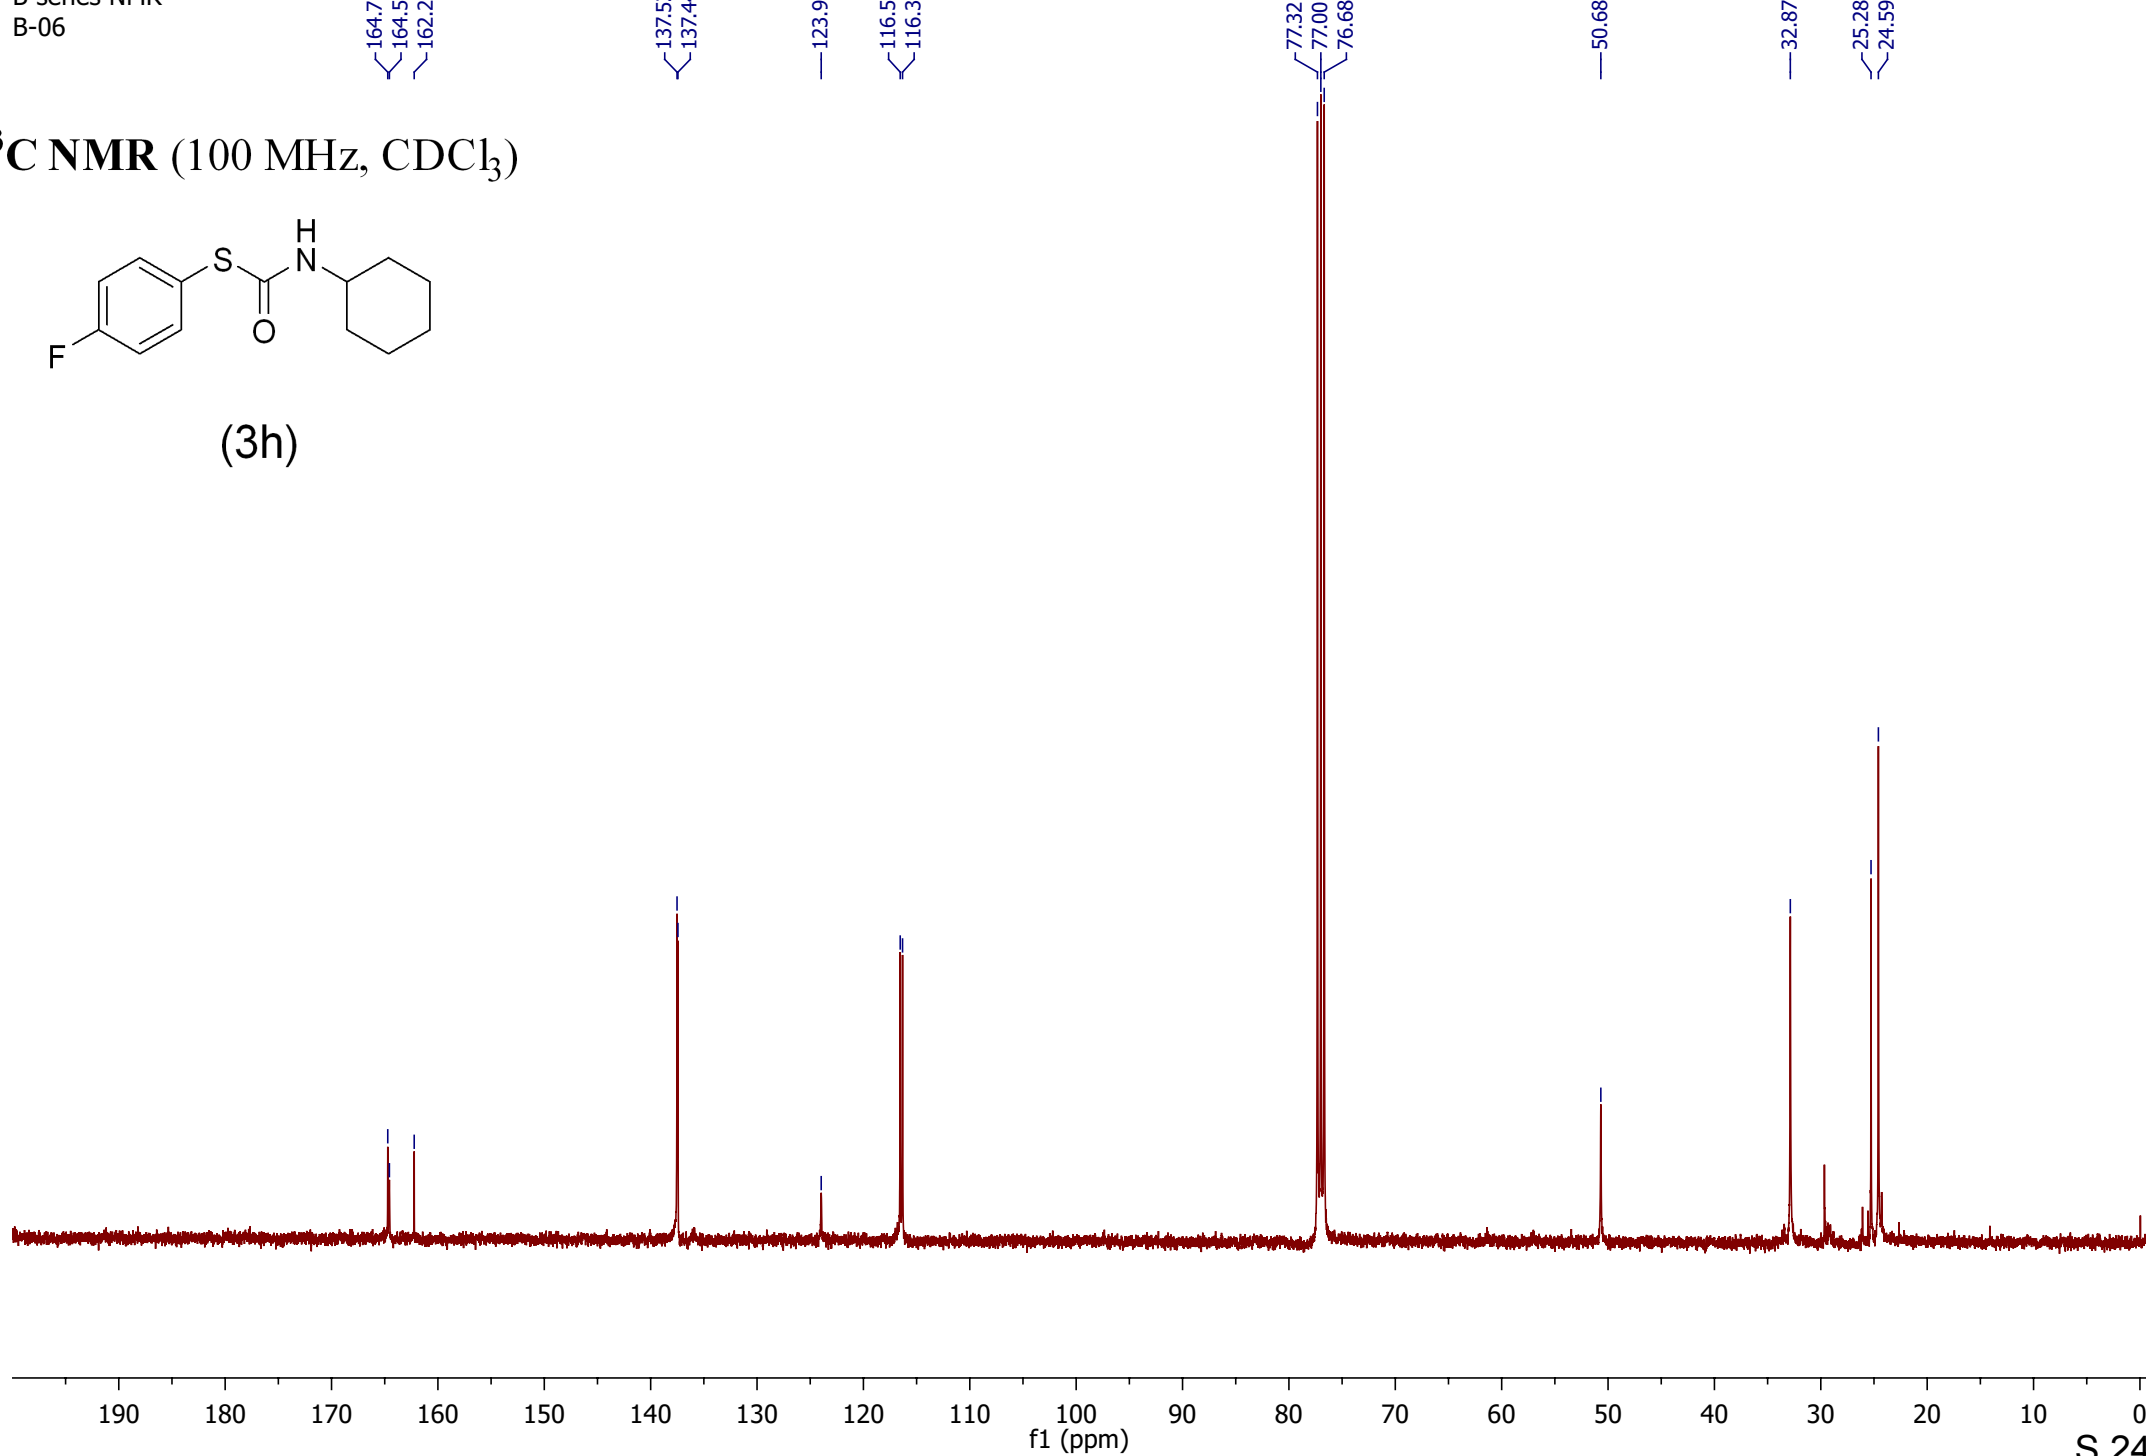

F-NMR  
B-06

**$^{19}\text{F}$  NMR (376 MHz,  $\text{CDCl}_3$ )**



(3h)

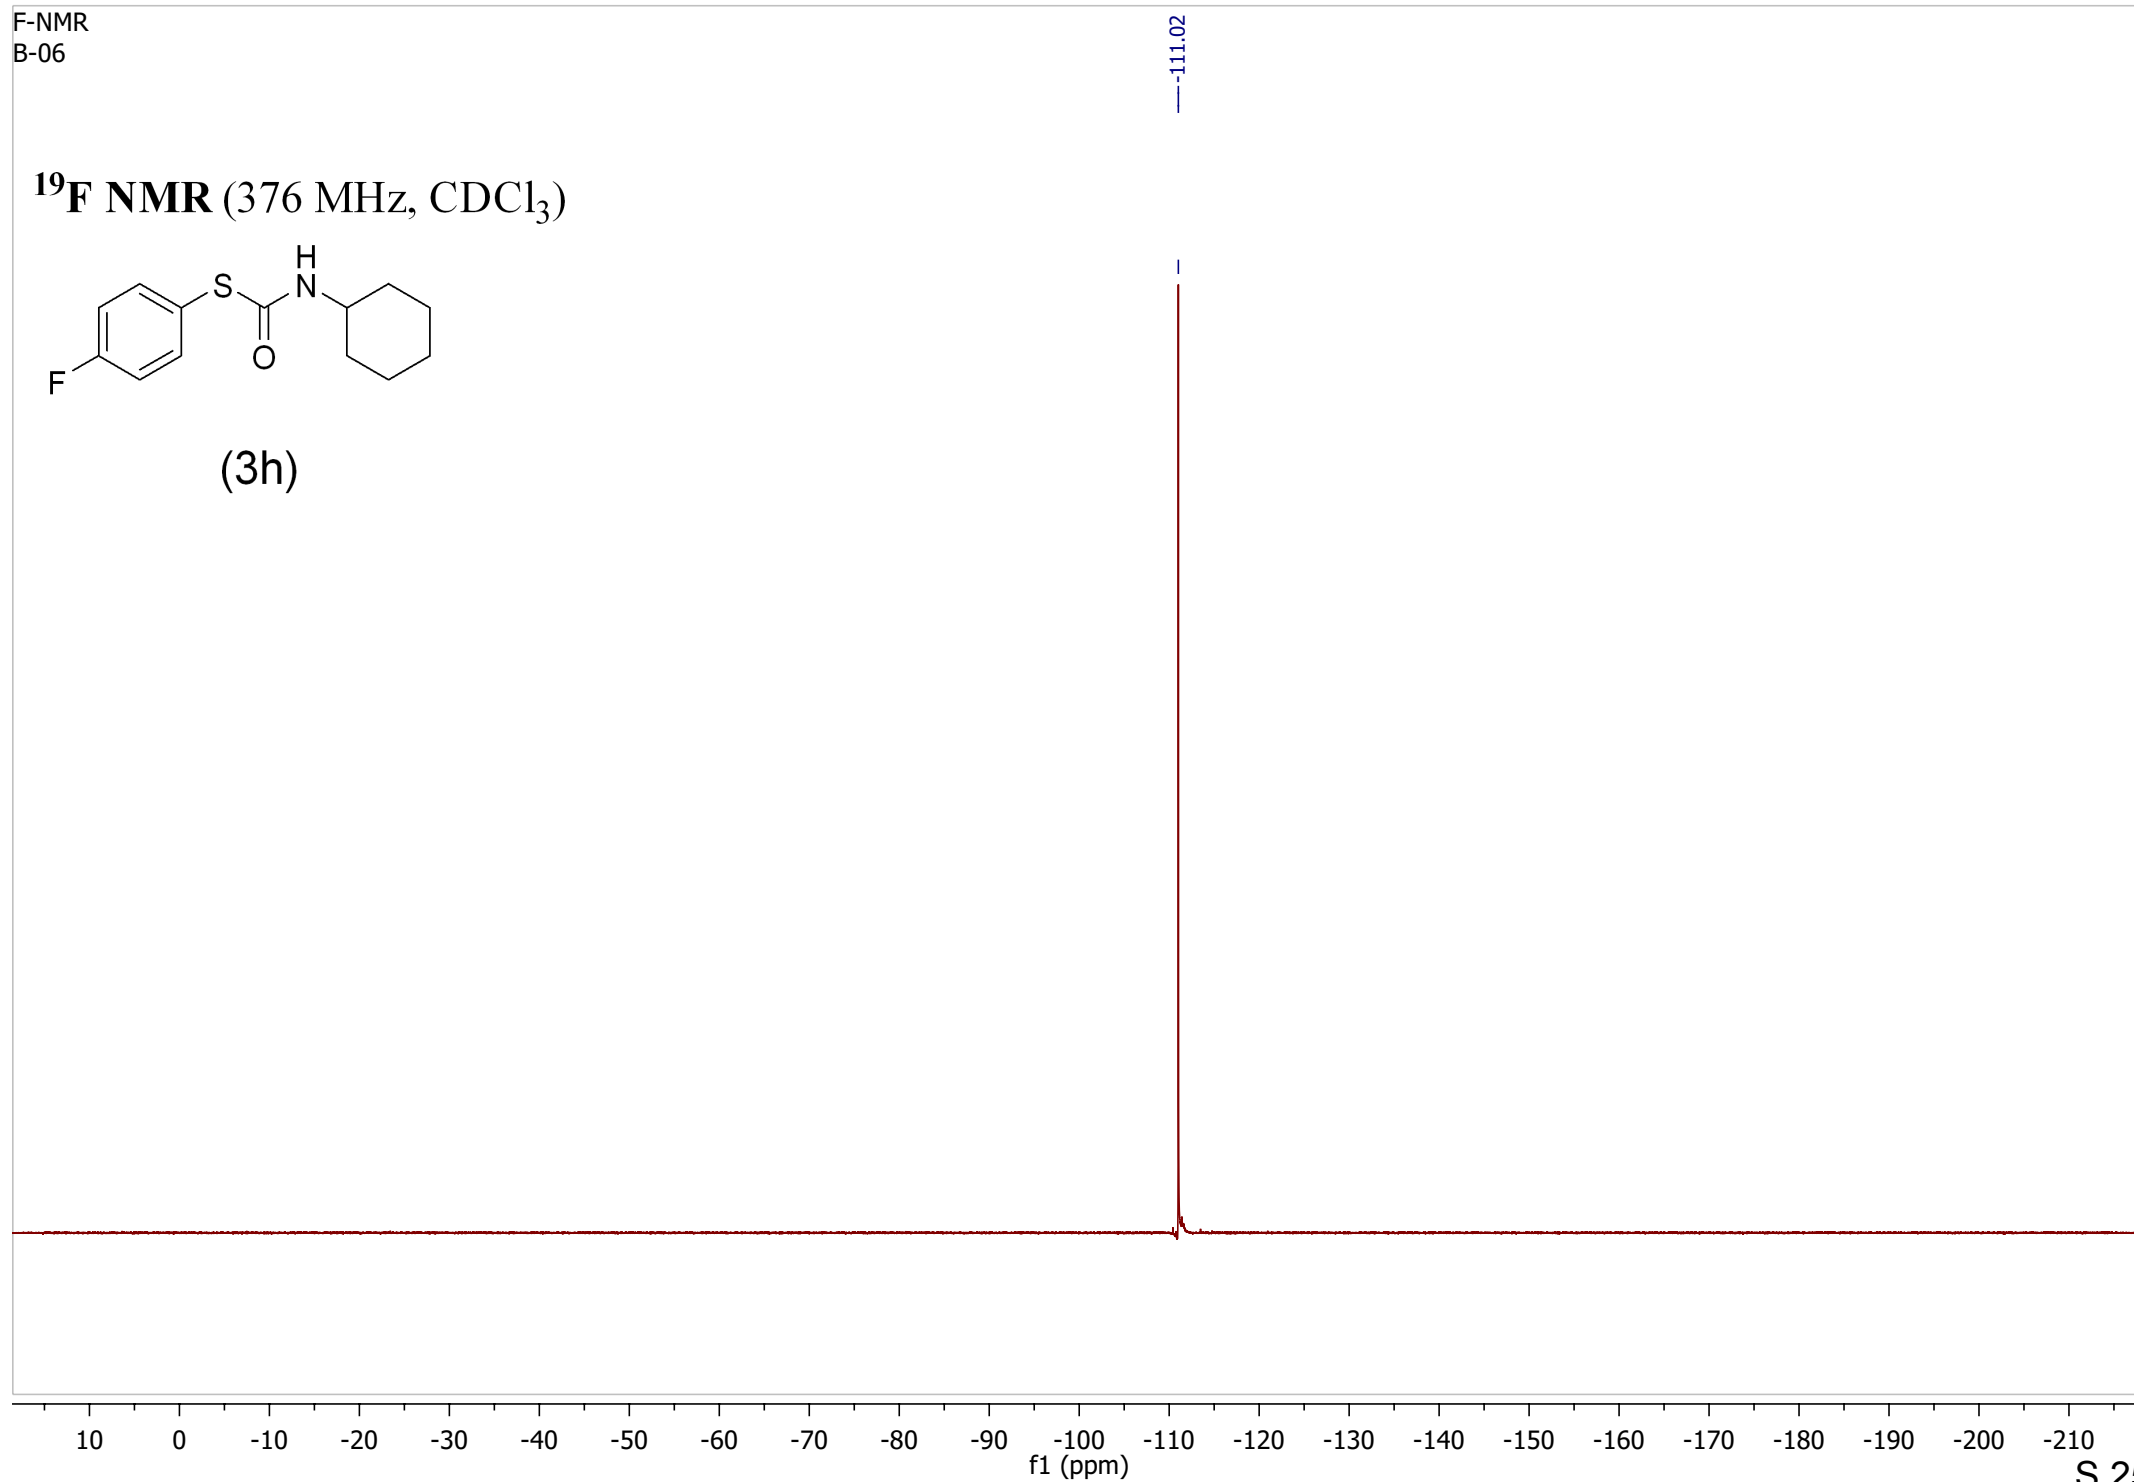

B series mahesh  
B-18

7.54  
7.53  
7.52  
7.51  
7.50  
7.41  
7.40  
7.39  
7.38  
7.38  
7.37  
7.26

5.23

3.73  
3.72  
3.71

1.93  
1.90  
1.69  
1.66  
1.60  
1.58  
1.57  
1.34  
1.31  
1.29  
1.28  
1.19  
1.19  
1.16  
1.15  
1.13  
1.12  
1.10  
1.09

# <sup>1</sup>H NMR (400 MHz, CDCl<sub>3</sub>)

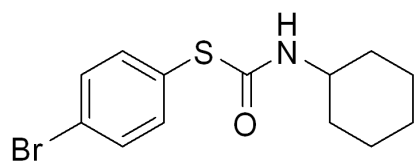

(3i)

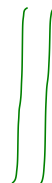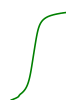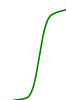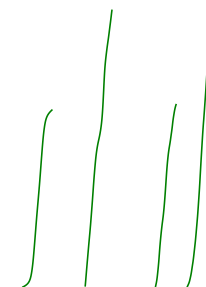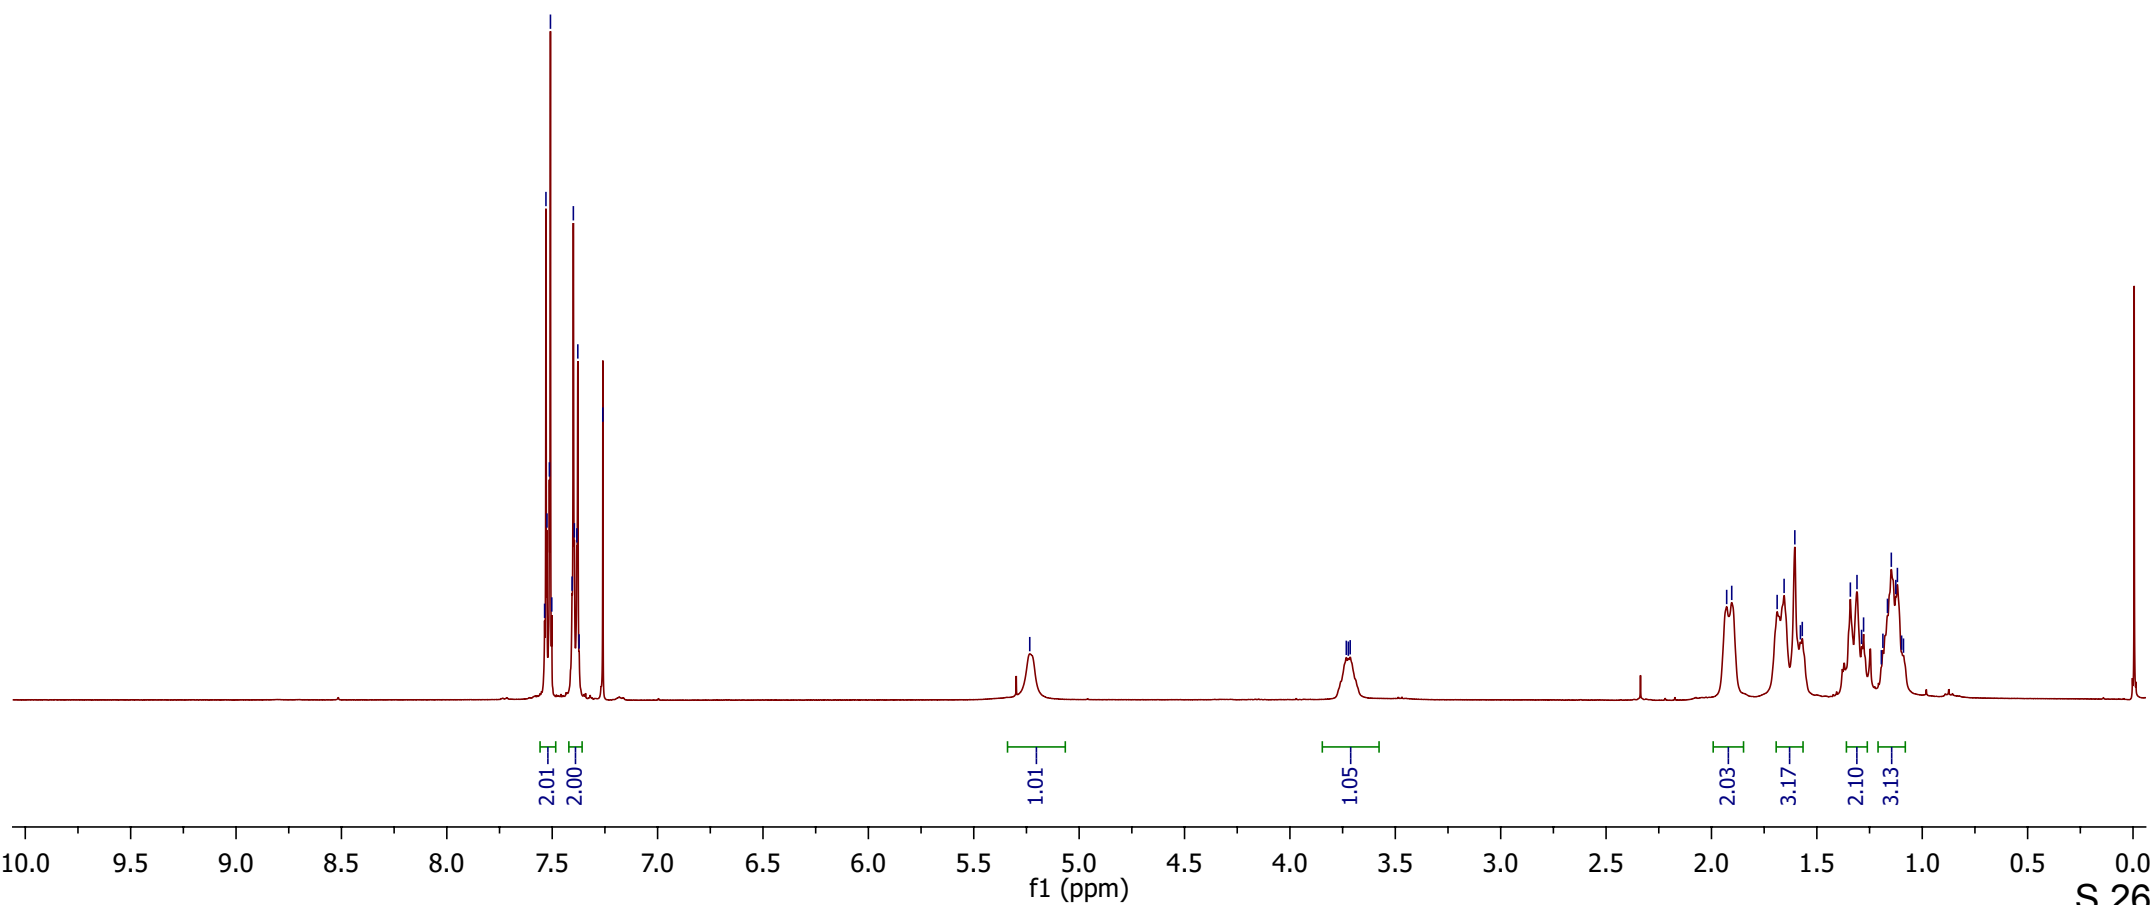

B series NMR  
B-18

163.84

136.68

132.34

127.75

124.02

77.32

77.00

76.68

50.81

32.90

25.28

24.63

# $^{13}\text{C}$ NMR (100 MHz, $\text{CDCl}_3$ )

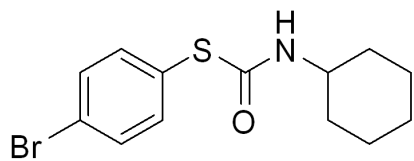

(3i)

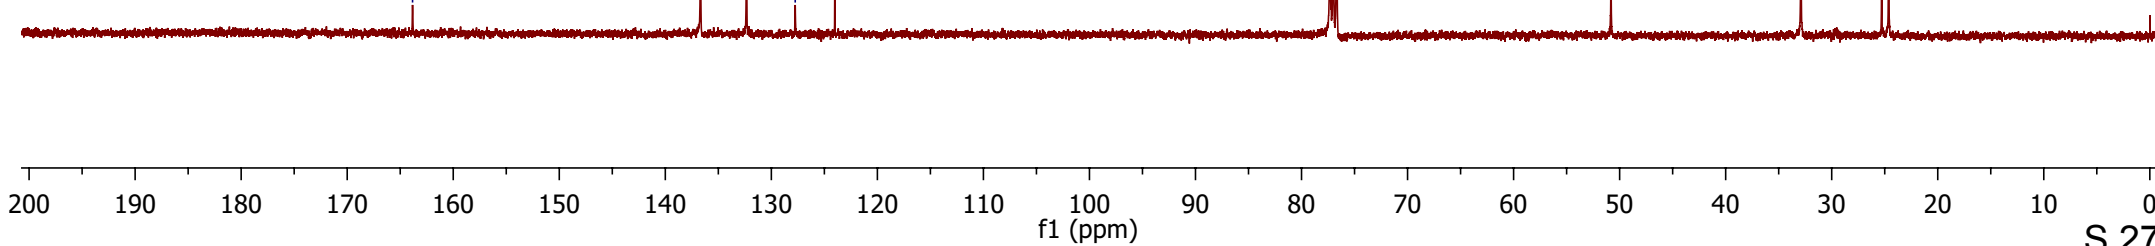

New NMR  
b-45

7.464  
7.457  
7.451  
7.440  
7.435  
7.427  
7.260  
6.943  
6.936  
6.930  
6.919  
6.914  
6.906

5.135

3.822

1.645

1.344

0.939

# <sup>1</sup>H NMR (400 MHz, CDCl<sub>3</sub>)

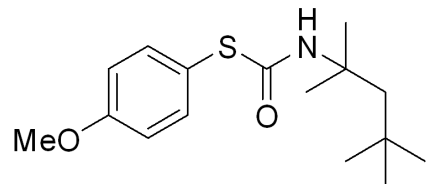

(3j)

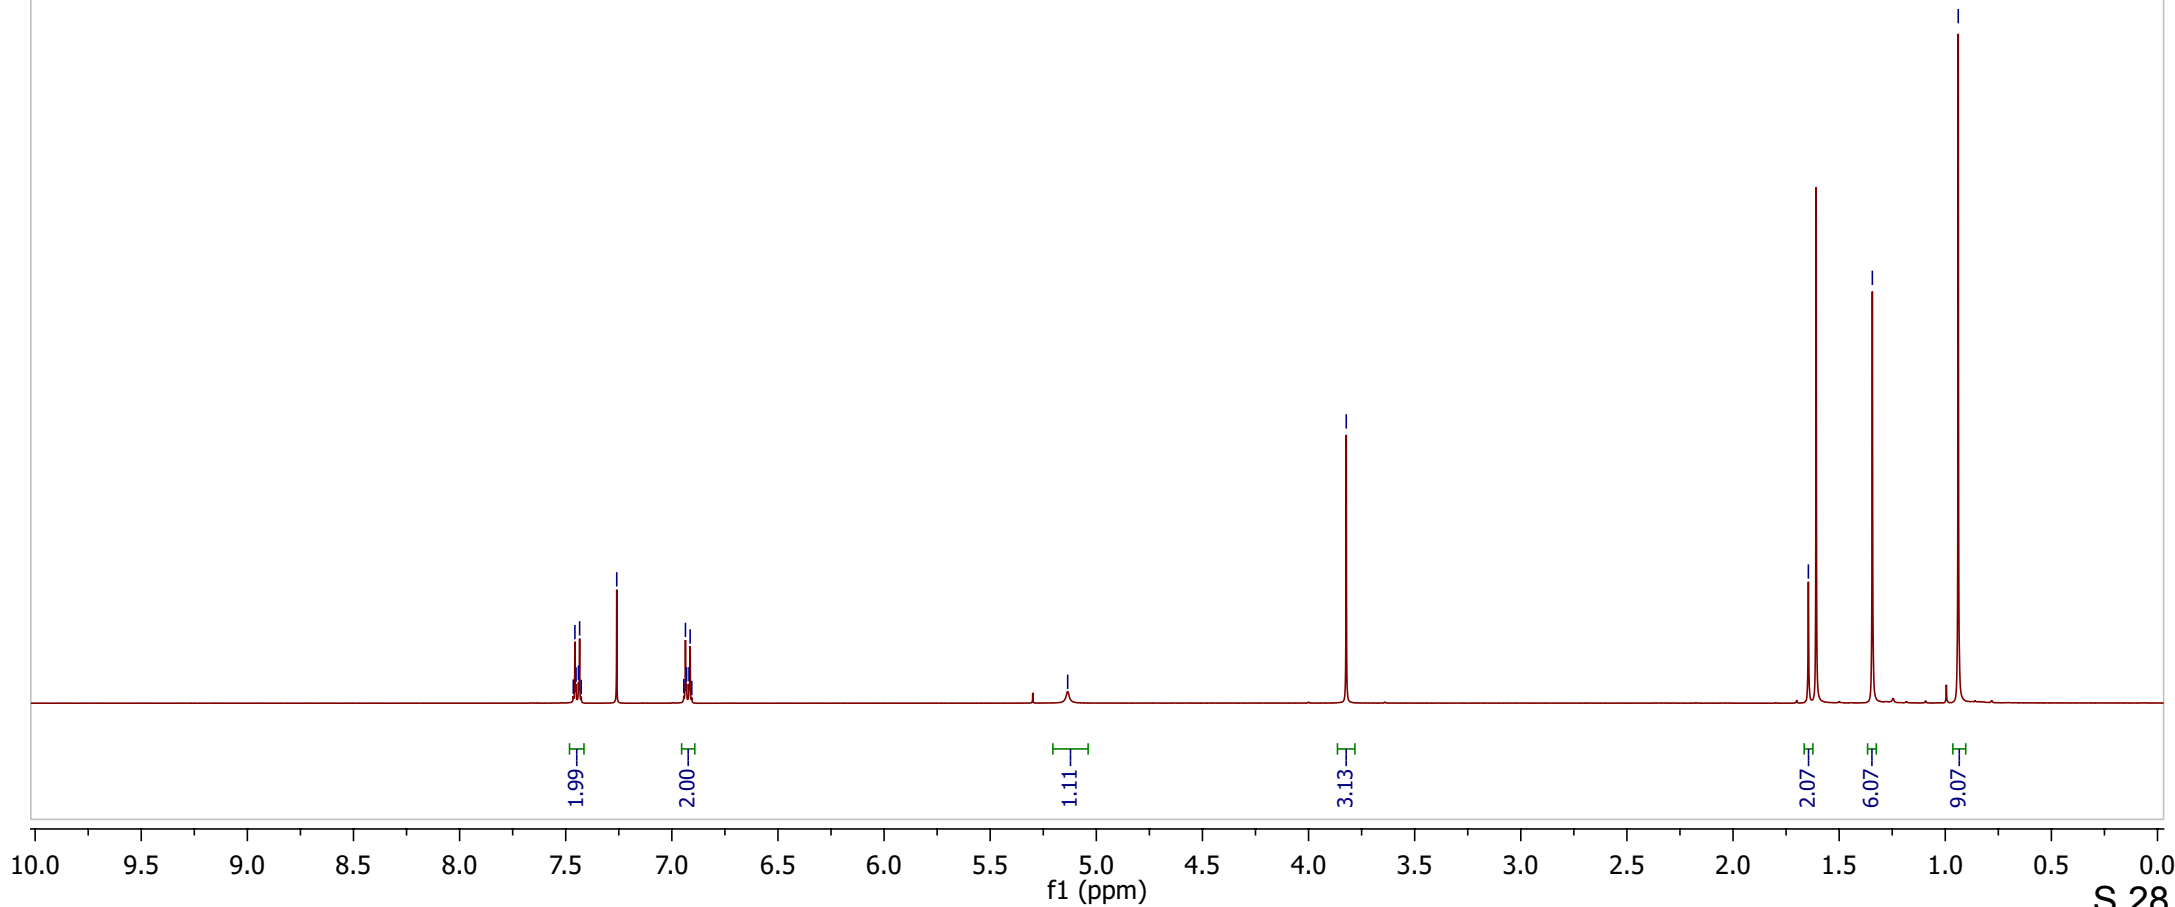



164.69

160.63

137.18

119.83

114.82

77.32

77.00

76.68

56.92

55.22

51.50

31.36

31.19

29.08

# <sup>13</sup>C NMR (100 MHz, CDCl<sub>3</sub>)

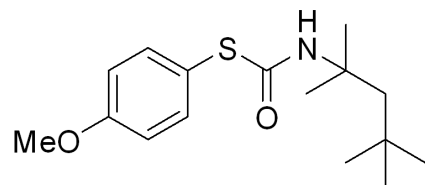

(3j)

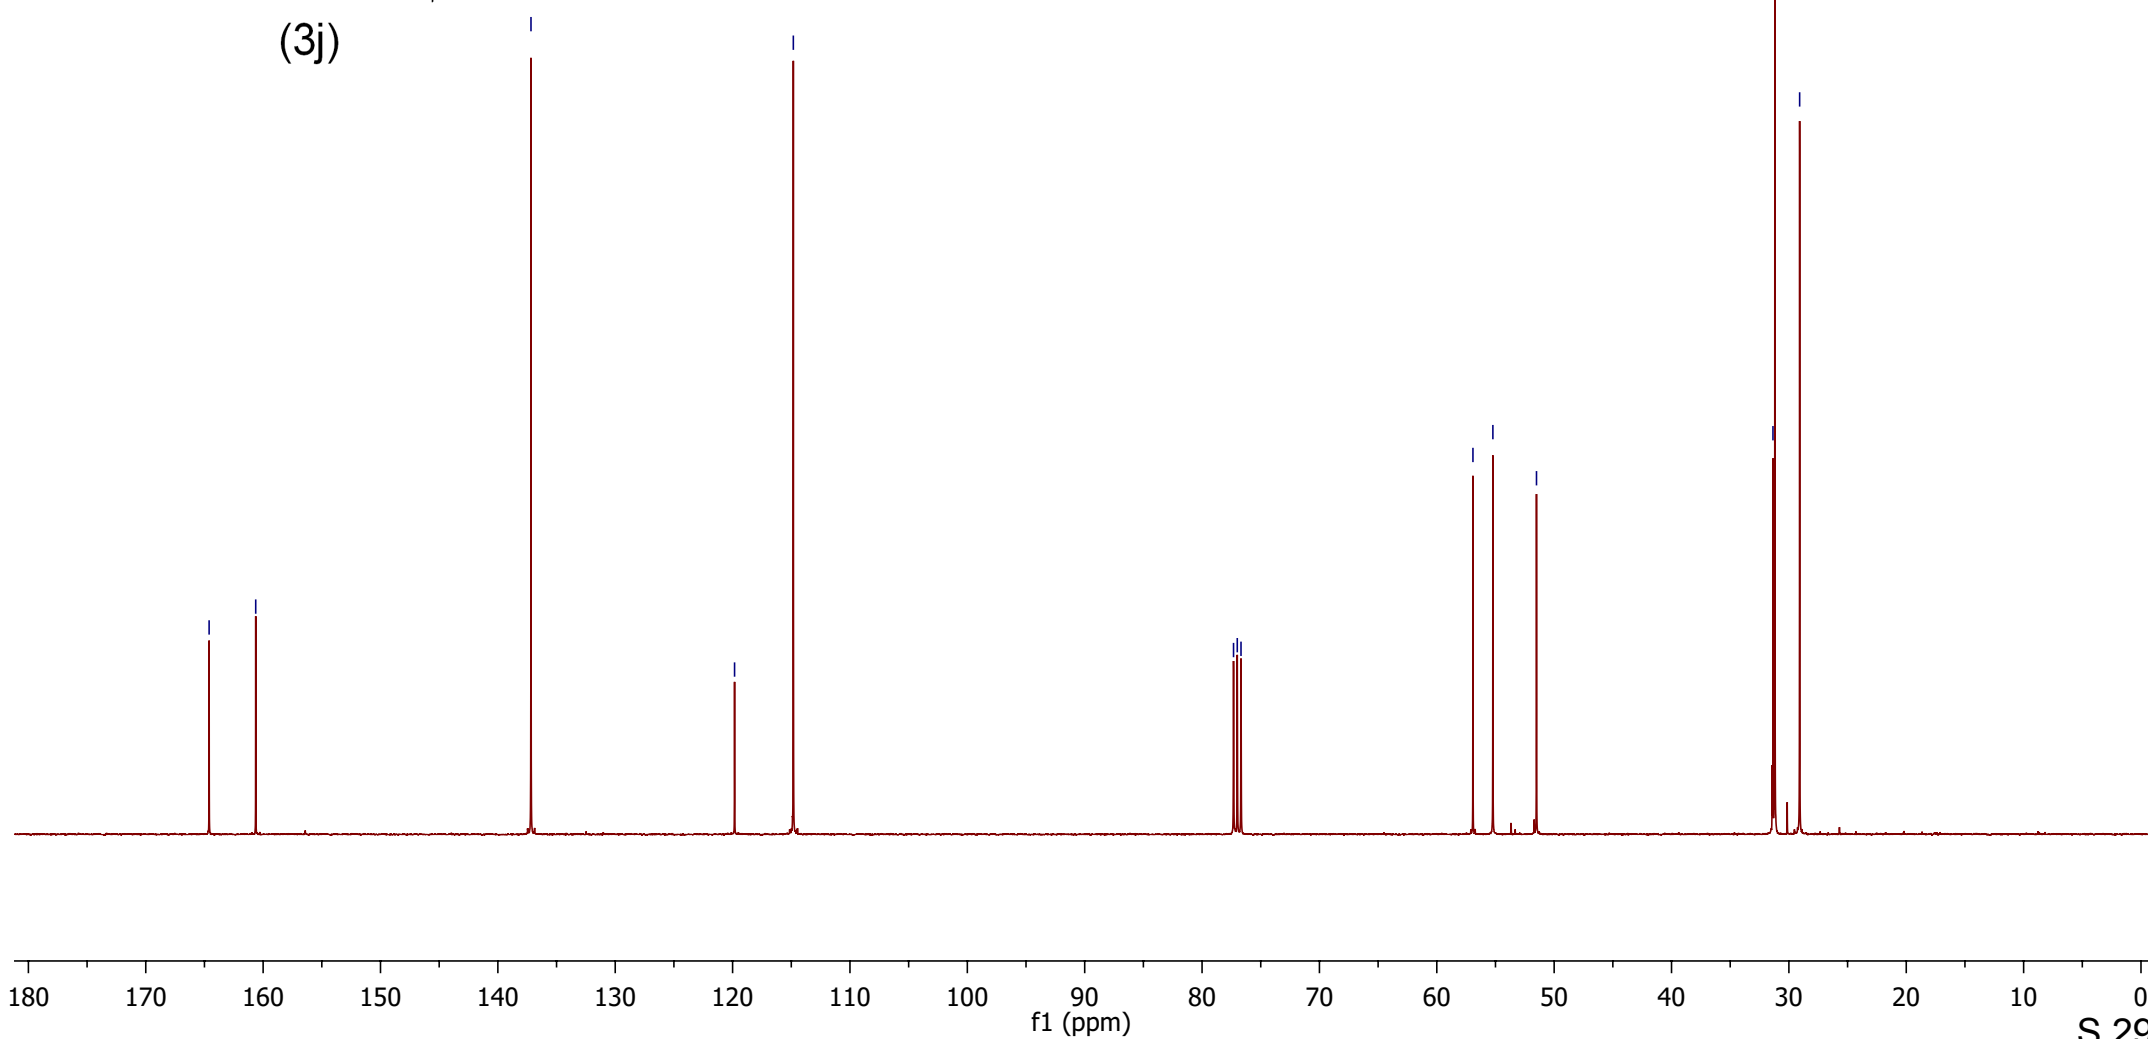

New NMR  
b-08

**<sup>1</sup>H NMR (400 MHz, CDCl<sub>3</sub>)**

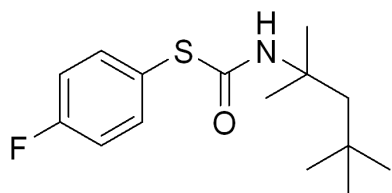

(3k)

7.493  
7.260  
7.088

5.155

1.673

1.373

0.971

10.0 9.5 9.0 8.5 8.0 7.5 7.0 6.5 6.0 5.5 5.0 4.5 4.0 3.5 3.0 2.5 2.0 1.5 1.0 0.5 0.0

f1 (ppm)

S 30

2.06

2.00

1.12

2.03

6.08

9.14

B series NMR  
B-08

164.64  
163.44  
162.15

137.62  
137.54

124.29  
124.26

116.44  
116.22

77.32  
77.00  
76.68

57.30

51.54

31.50  
31.28  
29.22

$^{13}\text{C}$  NMR (100 MHz,  $\text{CDCl}_3$ )



(3k)

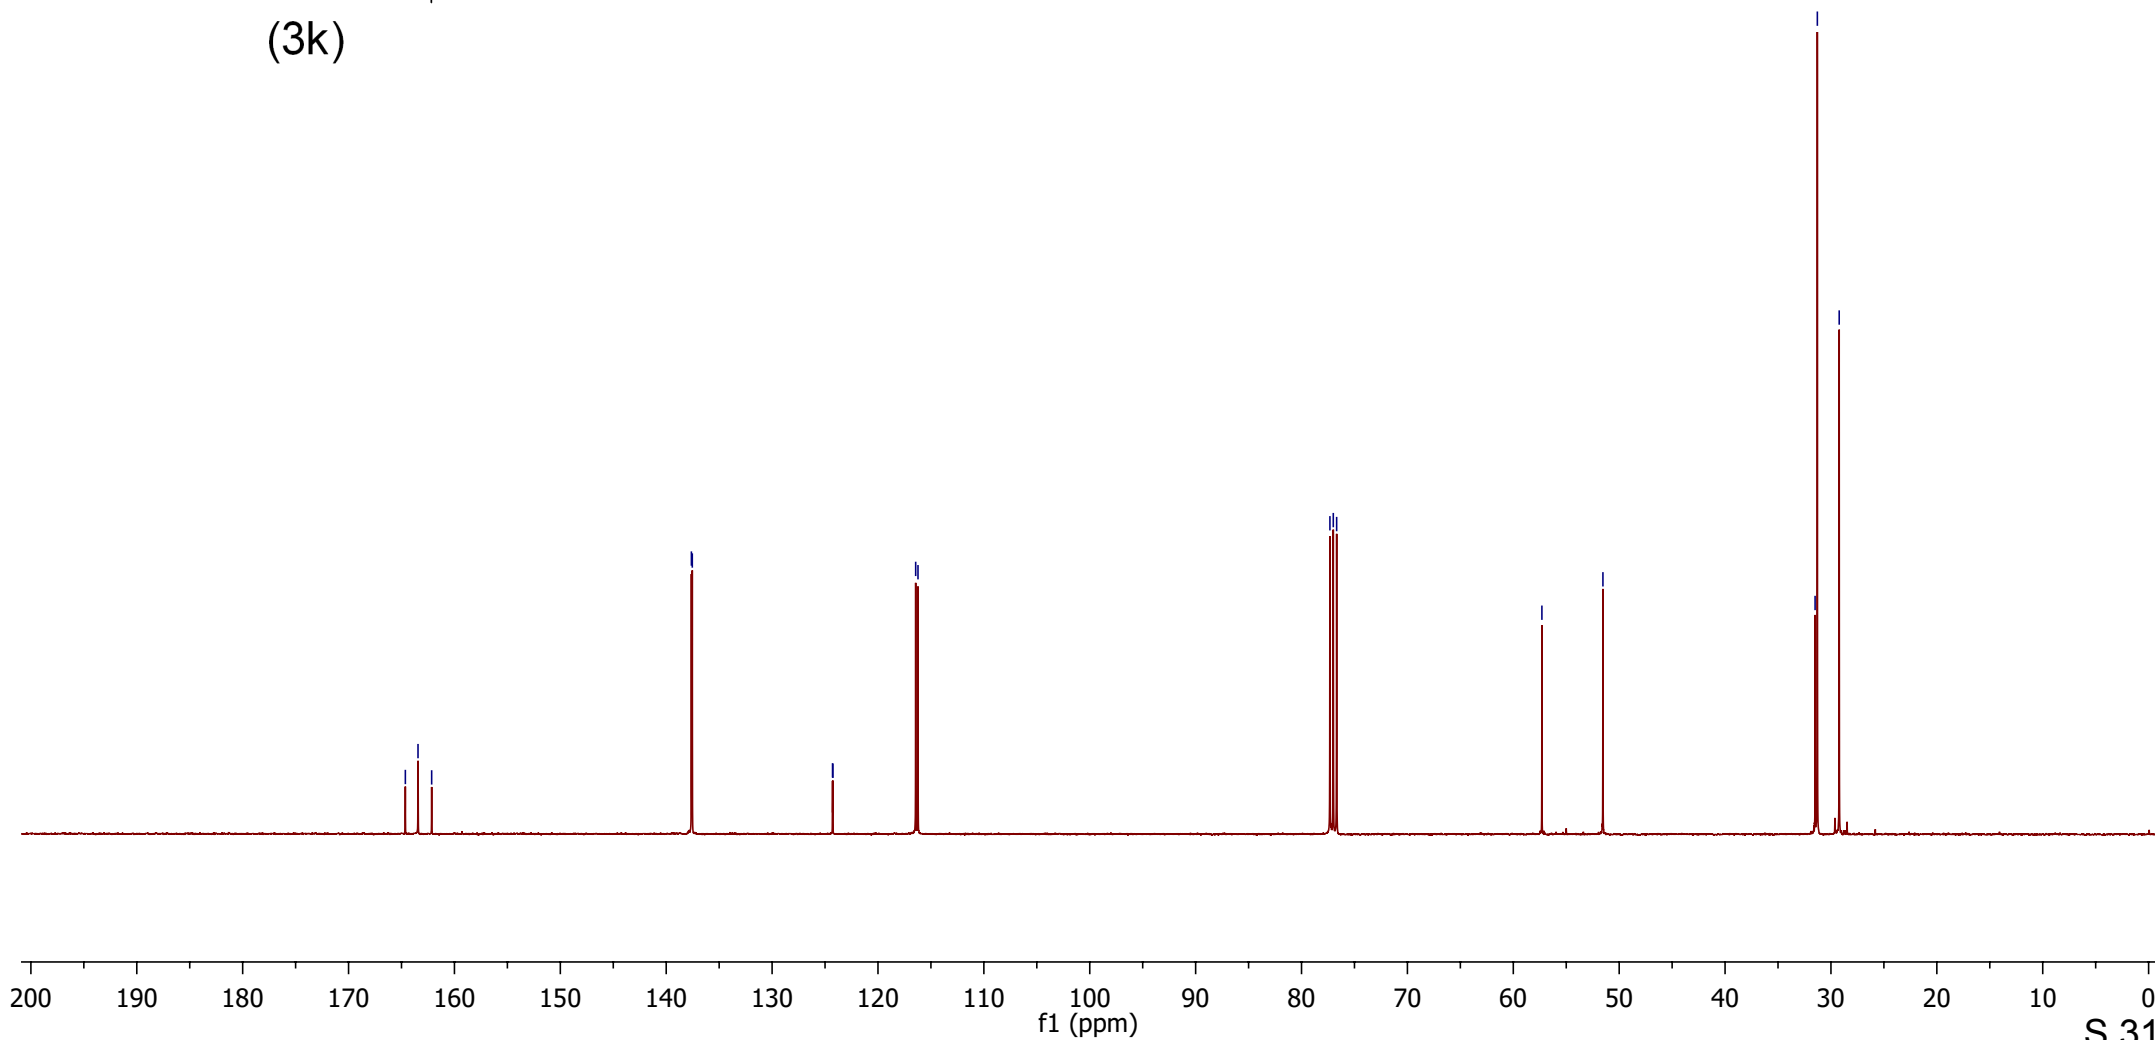

F-NMR  
B-08

$^{19}\text{F}$  NMR (376 MHz,  $\text{CDCl}_3$ )



(3k)

-111.23

10 0 -10 -20 -30 -40 -50 -60 -70 -80 -90 -100 -110 -120 -130 -140 -150 -160 -170 -180 -190 -200 -210  
f1 (ppm)

B series NMR  
B-16

7.456  
7.450  
7.445  
7.434  
7.429  
7.423  
7.374  
7.368  
7.363  
7.352  
7.347  
7.341  
7.260

5.172

1.684

1.378

0.980

0.006

# $^1\text{H}$ NMR (400 MHz, $\text{CDCl}_3$ )

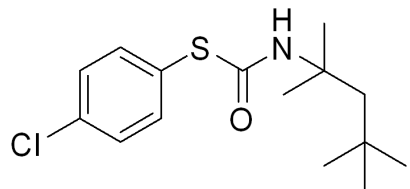

(3)

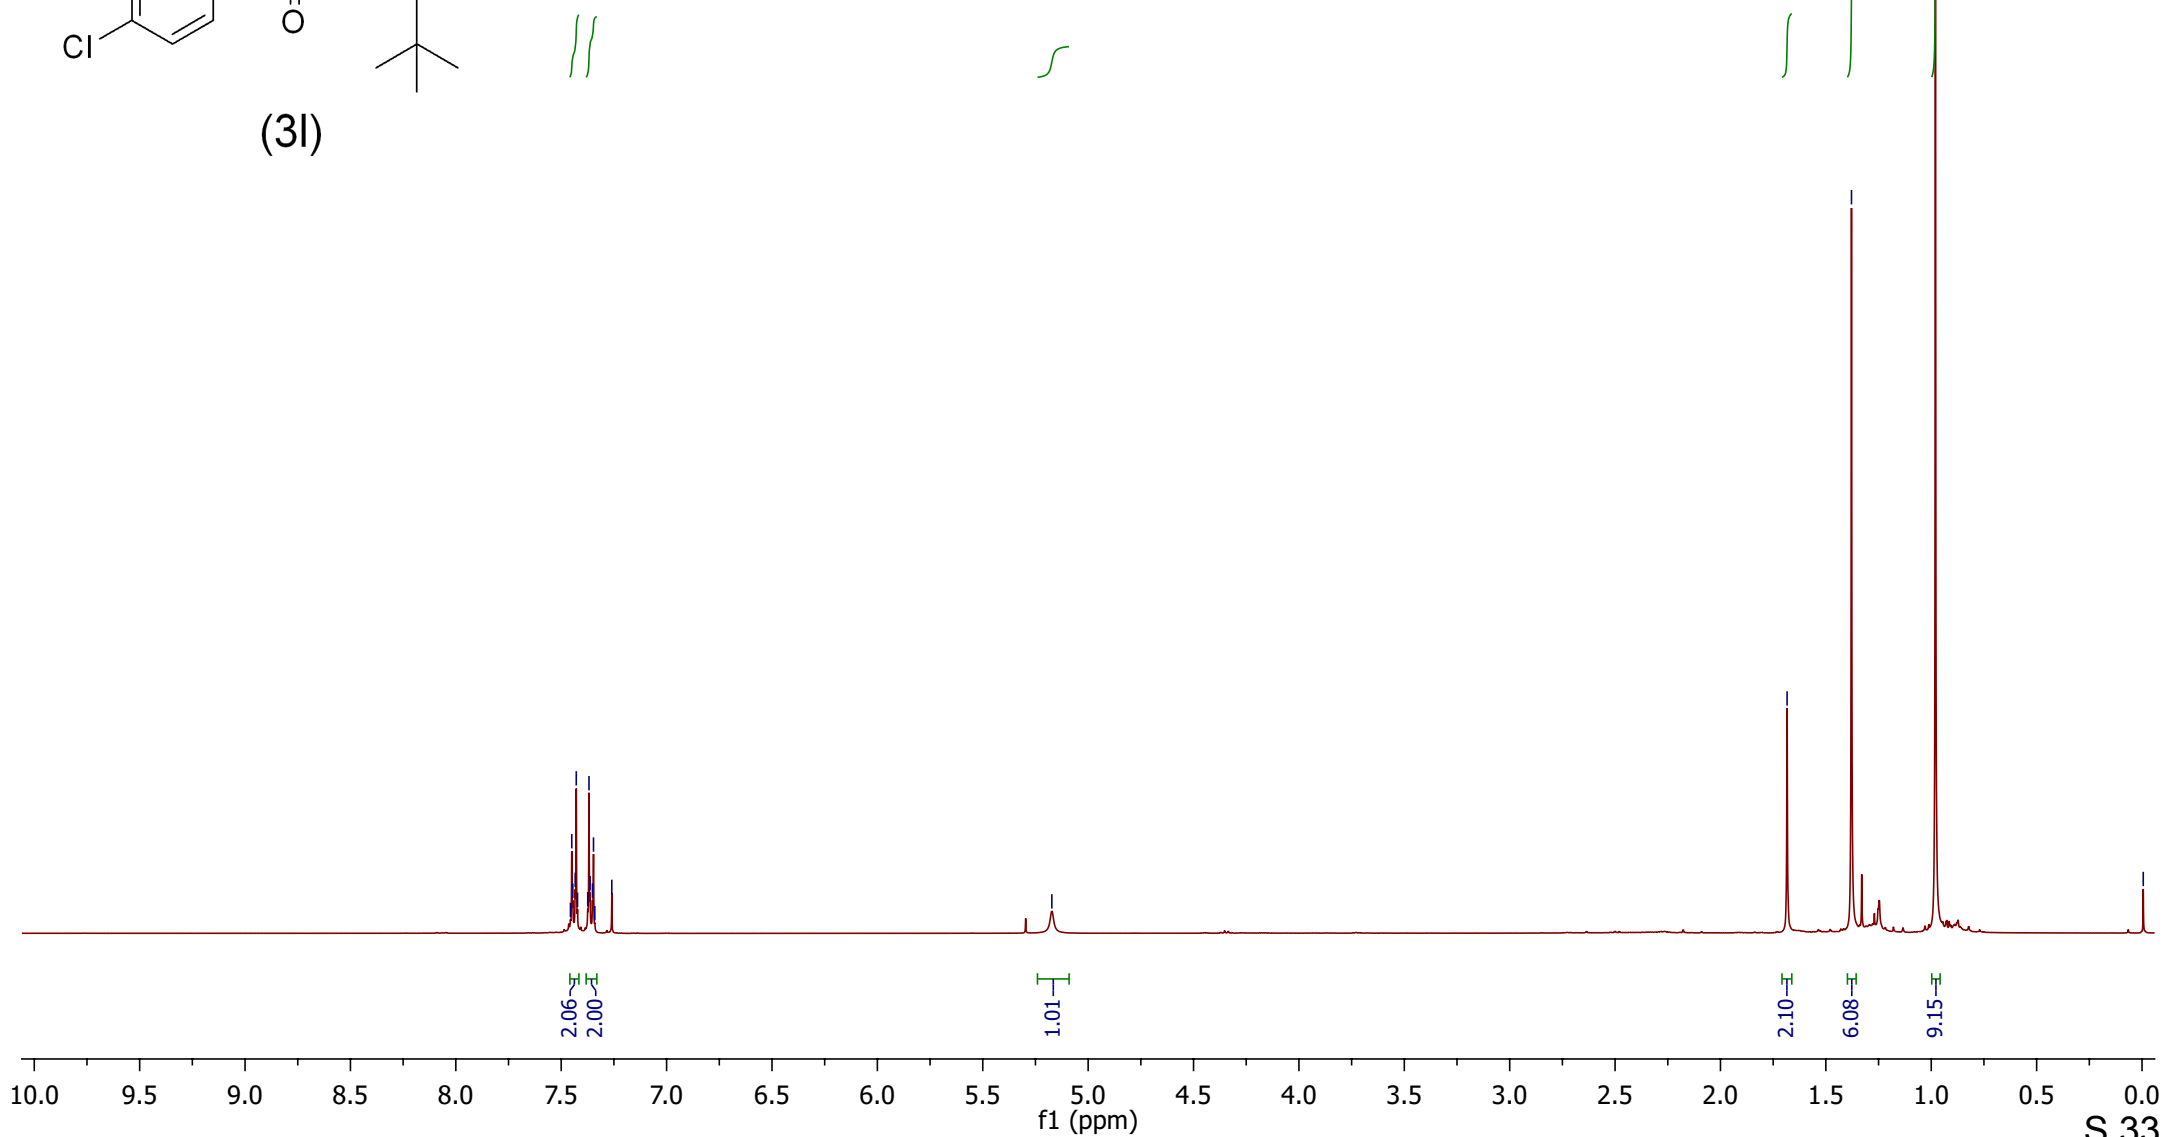

B series NMR  
B-16

162.95

136.65  
135.70

129.34  
127.37

77.32  
77.00  
76.68

57.46

51.58

31.55  
31.33  
29.28

# $^{13}\text{C}$ NMR (100 MHz, $\text{CDCl}_3$ )

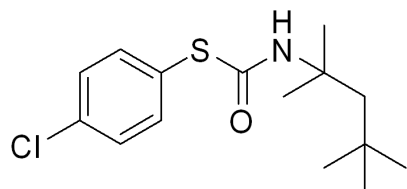

(3I)

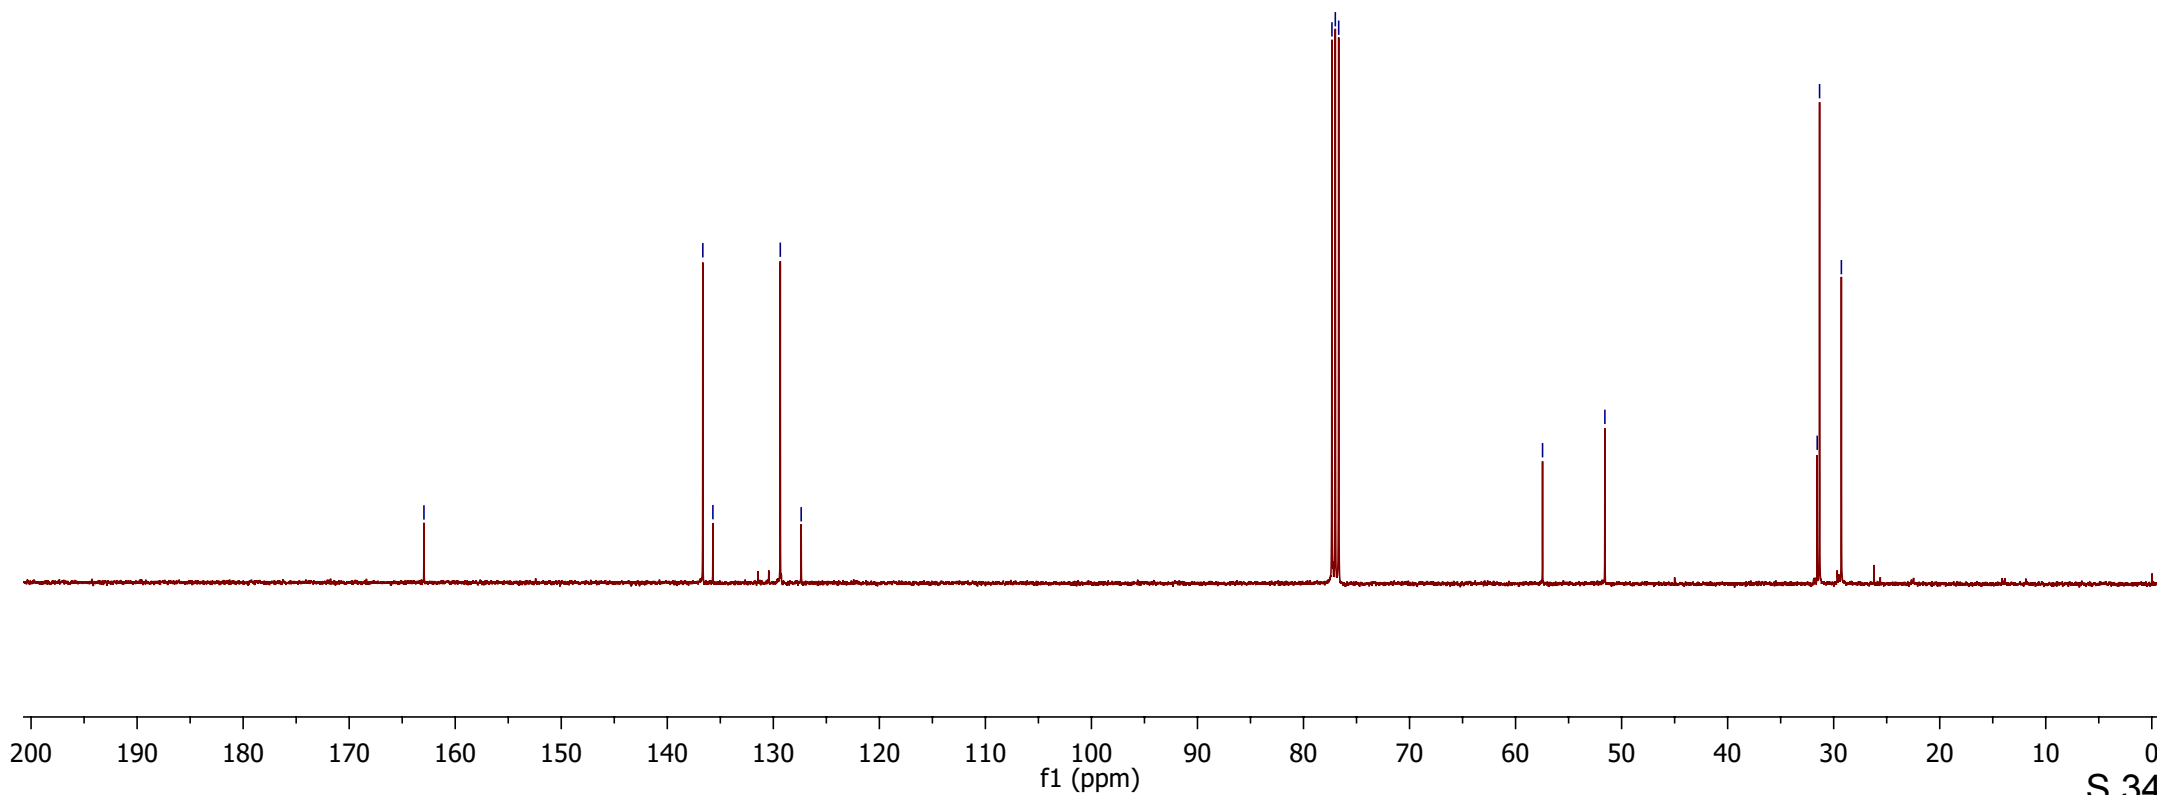

New NMR  
b-20

# <sup>1</sup>H NMR (400 MHz, CDCl<sub>3</sub>)

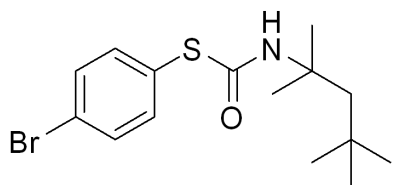

(3m)

7.532  
7.526  
7.521  
7.510  
7.505  
7.499  
7.387  
7.381  
7.376  
7.364  
7.359  
7.353  
7.260

5.161

1.686

1.382

0.983

2.00

2.00

1.06

2.02

6.08

9.09

10.0 9.5 9.0 8.5 8.0 7.5 7.0 6.5 6.0 5.5 5.0 4.5 4.0 3.5 3.0 2.5 2.0 1.5 1.0 0.5 0.0

f1 (ppm)

March NMR 2020  
b-20

162.76

136.85

132.31

128.09

123.98

77.32

77.00

76.68

57.51

51.70

31.58

31.36

29.30

# <sup>13</sup>C NMR (100 MHz, CDCl<sub>3</sub>)

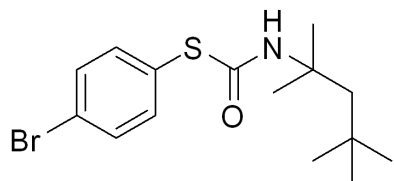

(3m)

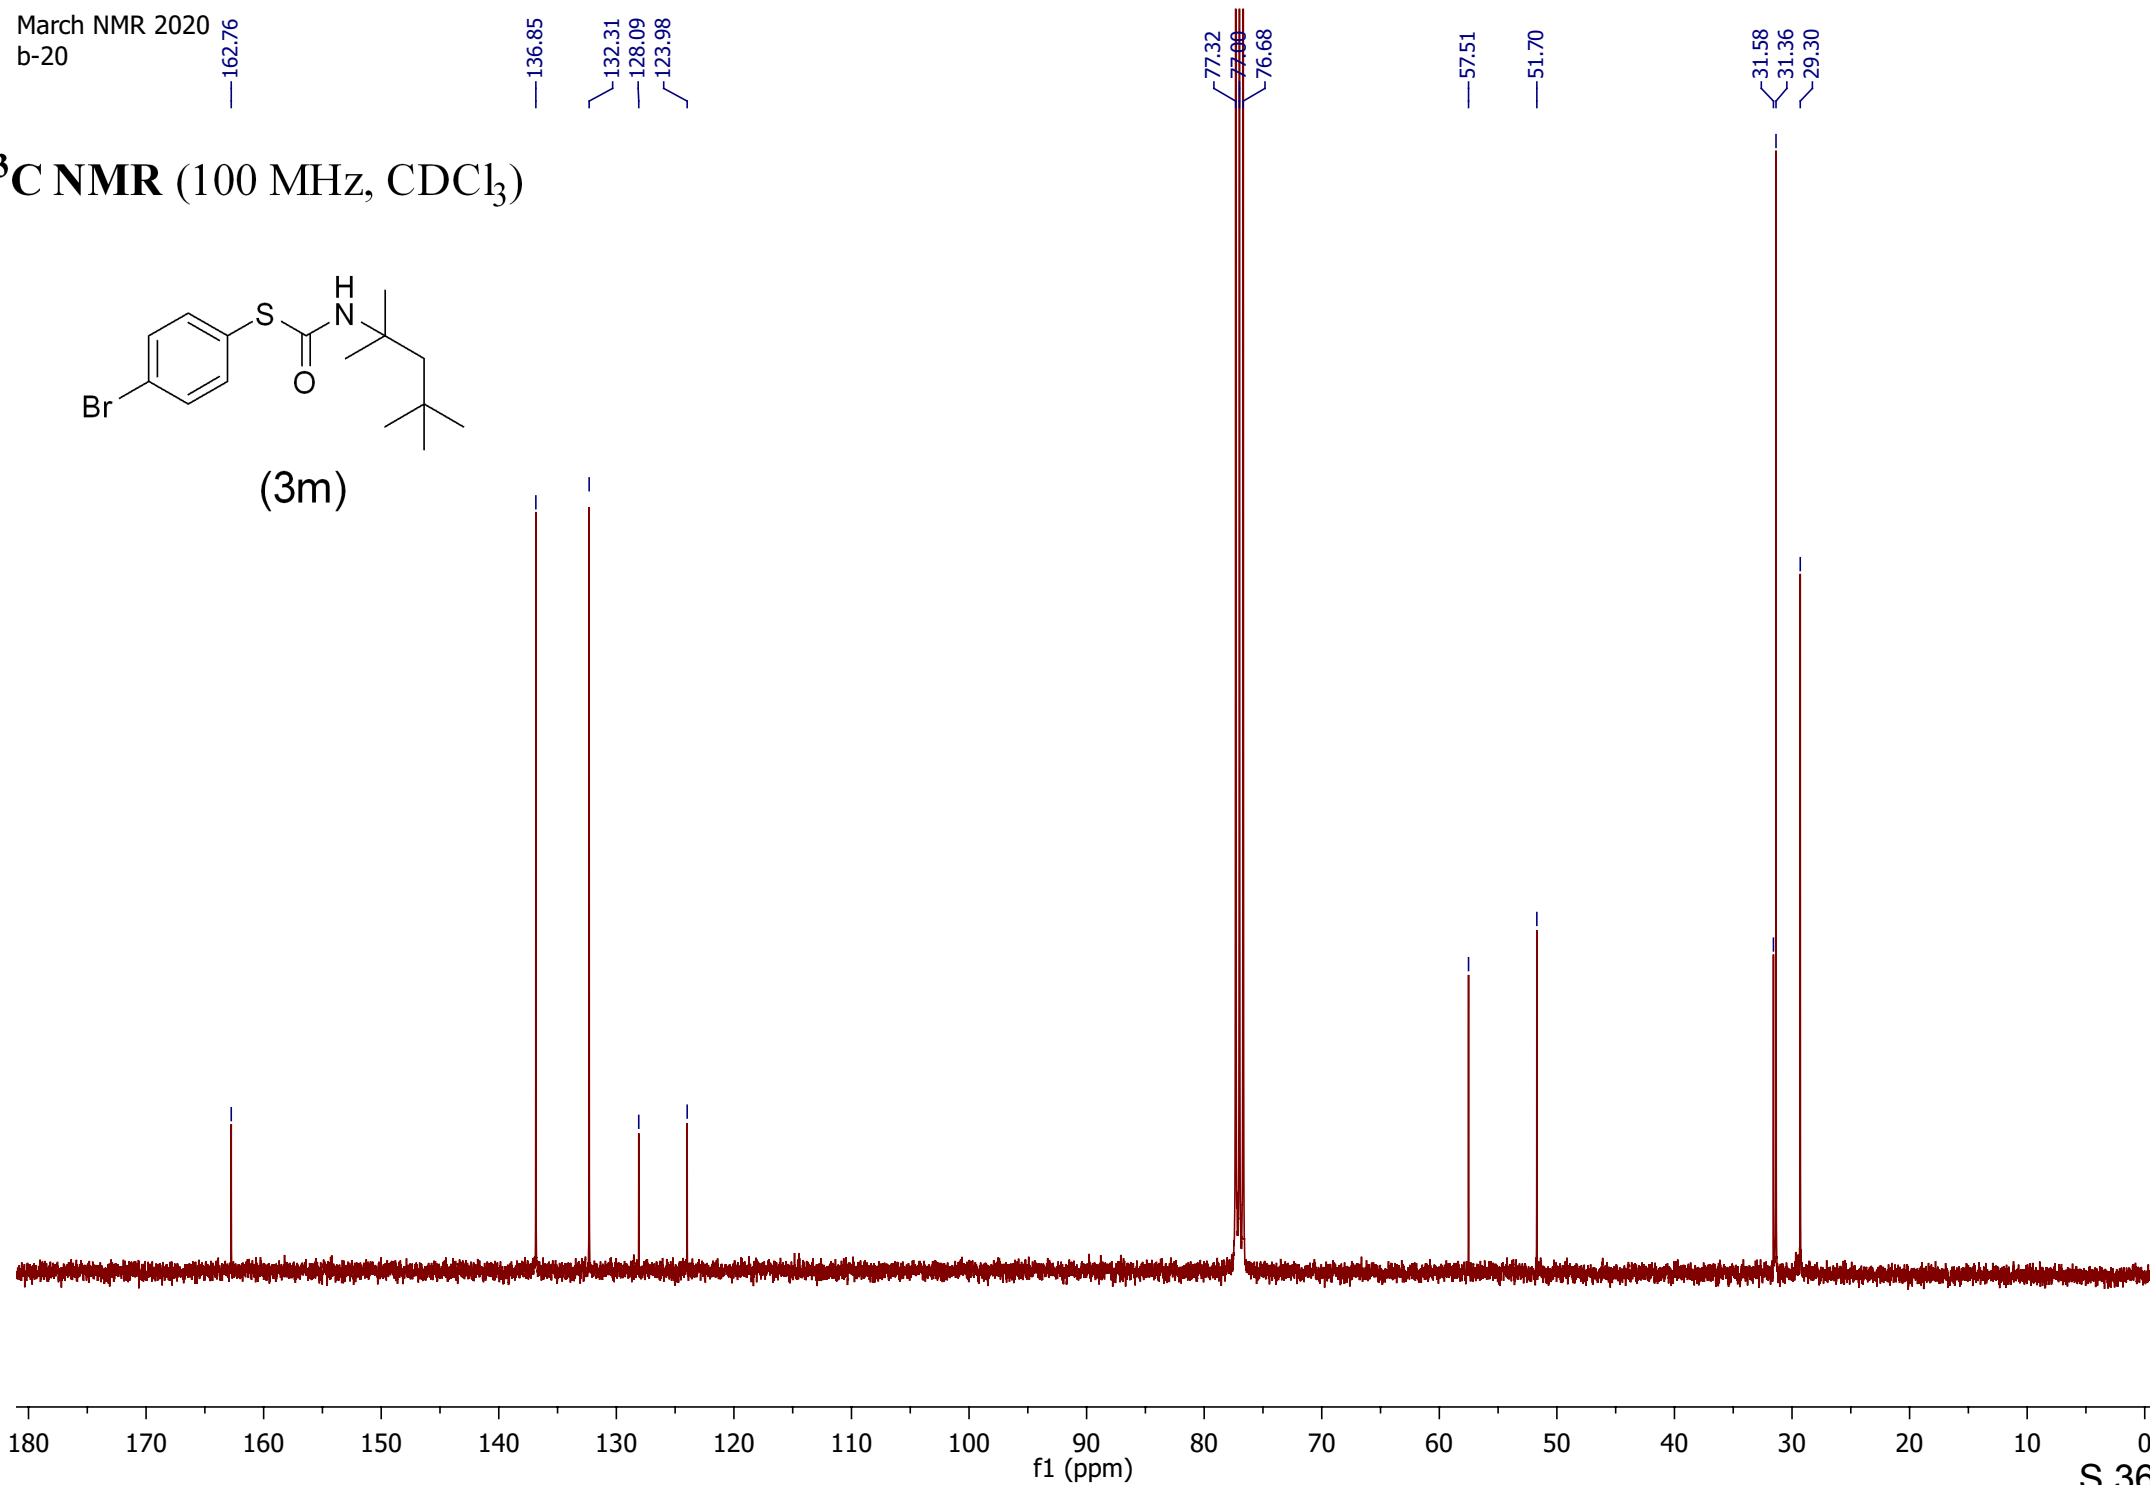



B series NMR  
b-03

7.563  
7.557  
7.548  
7.539  
7.416  
7.407  
7.401  
7.391  
7.260

5.595

5.273

3.245  
3.228  
3.212  
3.195

1.482  
1.463  
1.445  
1.427  
1.409  
1.319  
1.311  
1.303  
1.286  
1.268  
1.250  
1.236  
1.228  
1.210  
1.199  
0.879  
0.861  
0.843

# <sup>1</sup>H NMR (400 MHz, CDCl<sub>3</sub>)

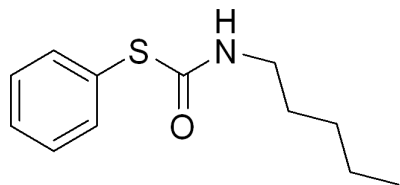

(3n)

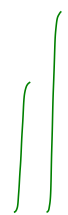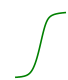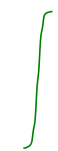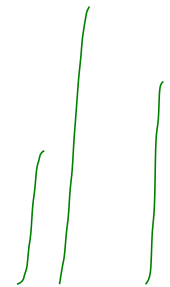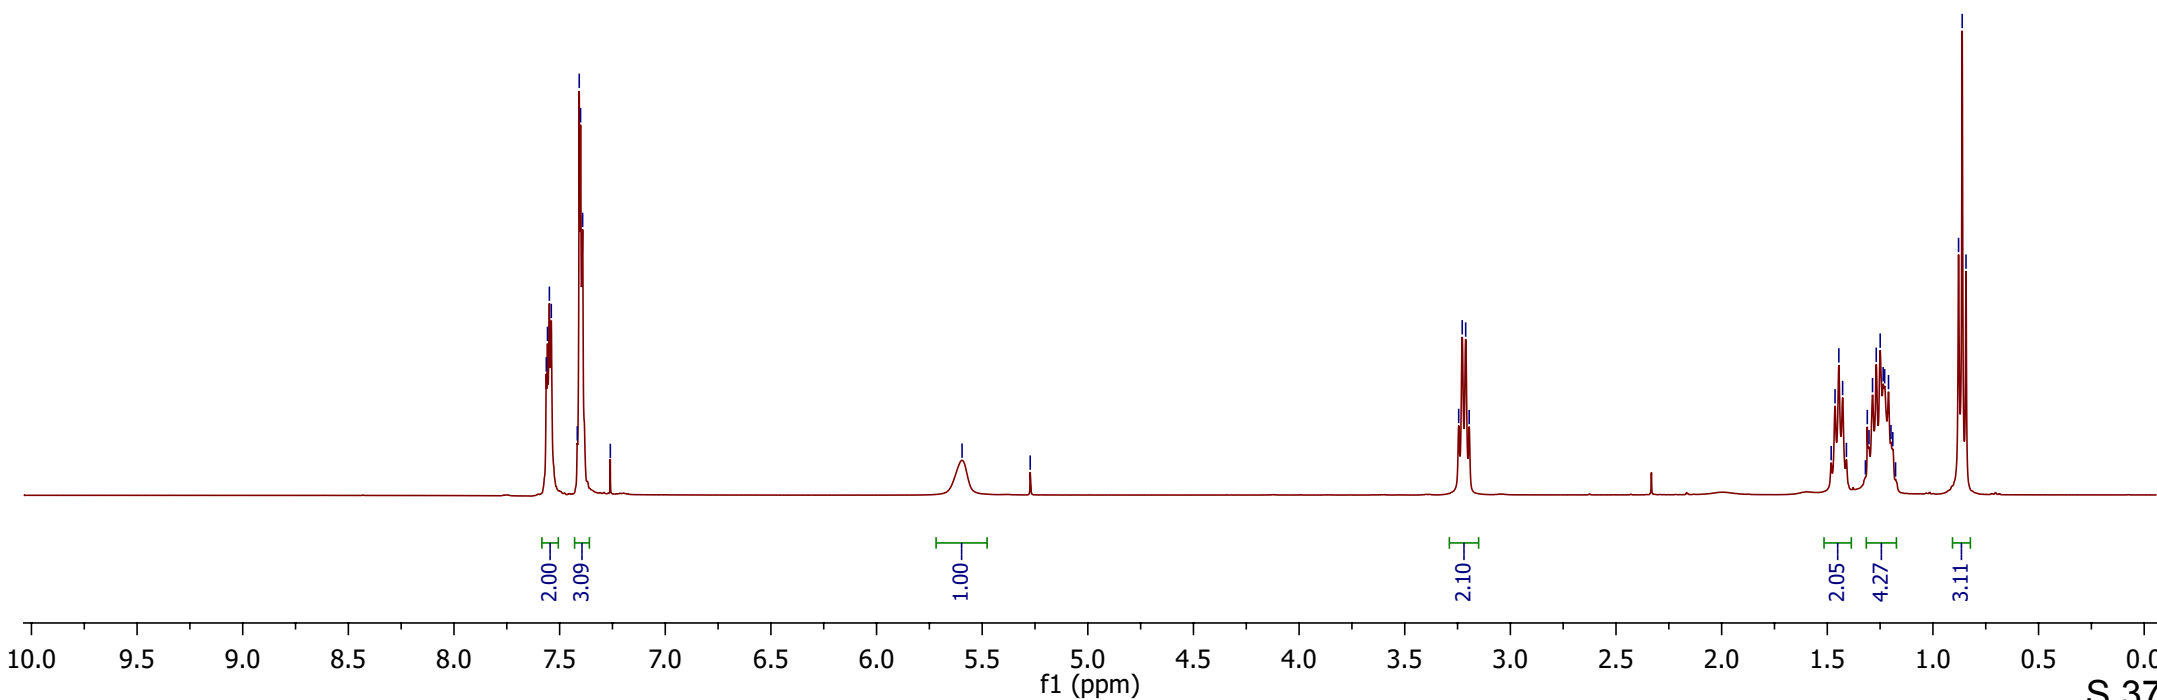

B series NMR  
b-03

—165.87

—135.33

129.42

129.26

128.59

77.32

77.00

76.68

—41.39

29.01

28.68

—22.11

—13.84

<sup>13</sup>C NMR (100 MHz, CDCl<sub>3</sub>)

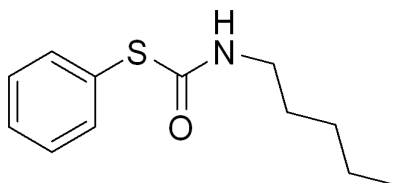

(3n)

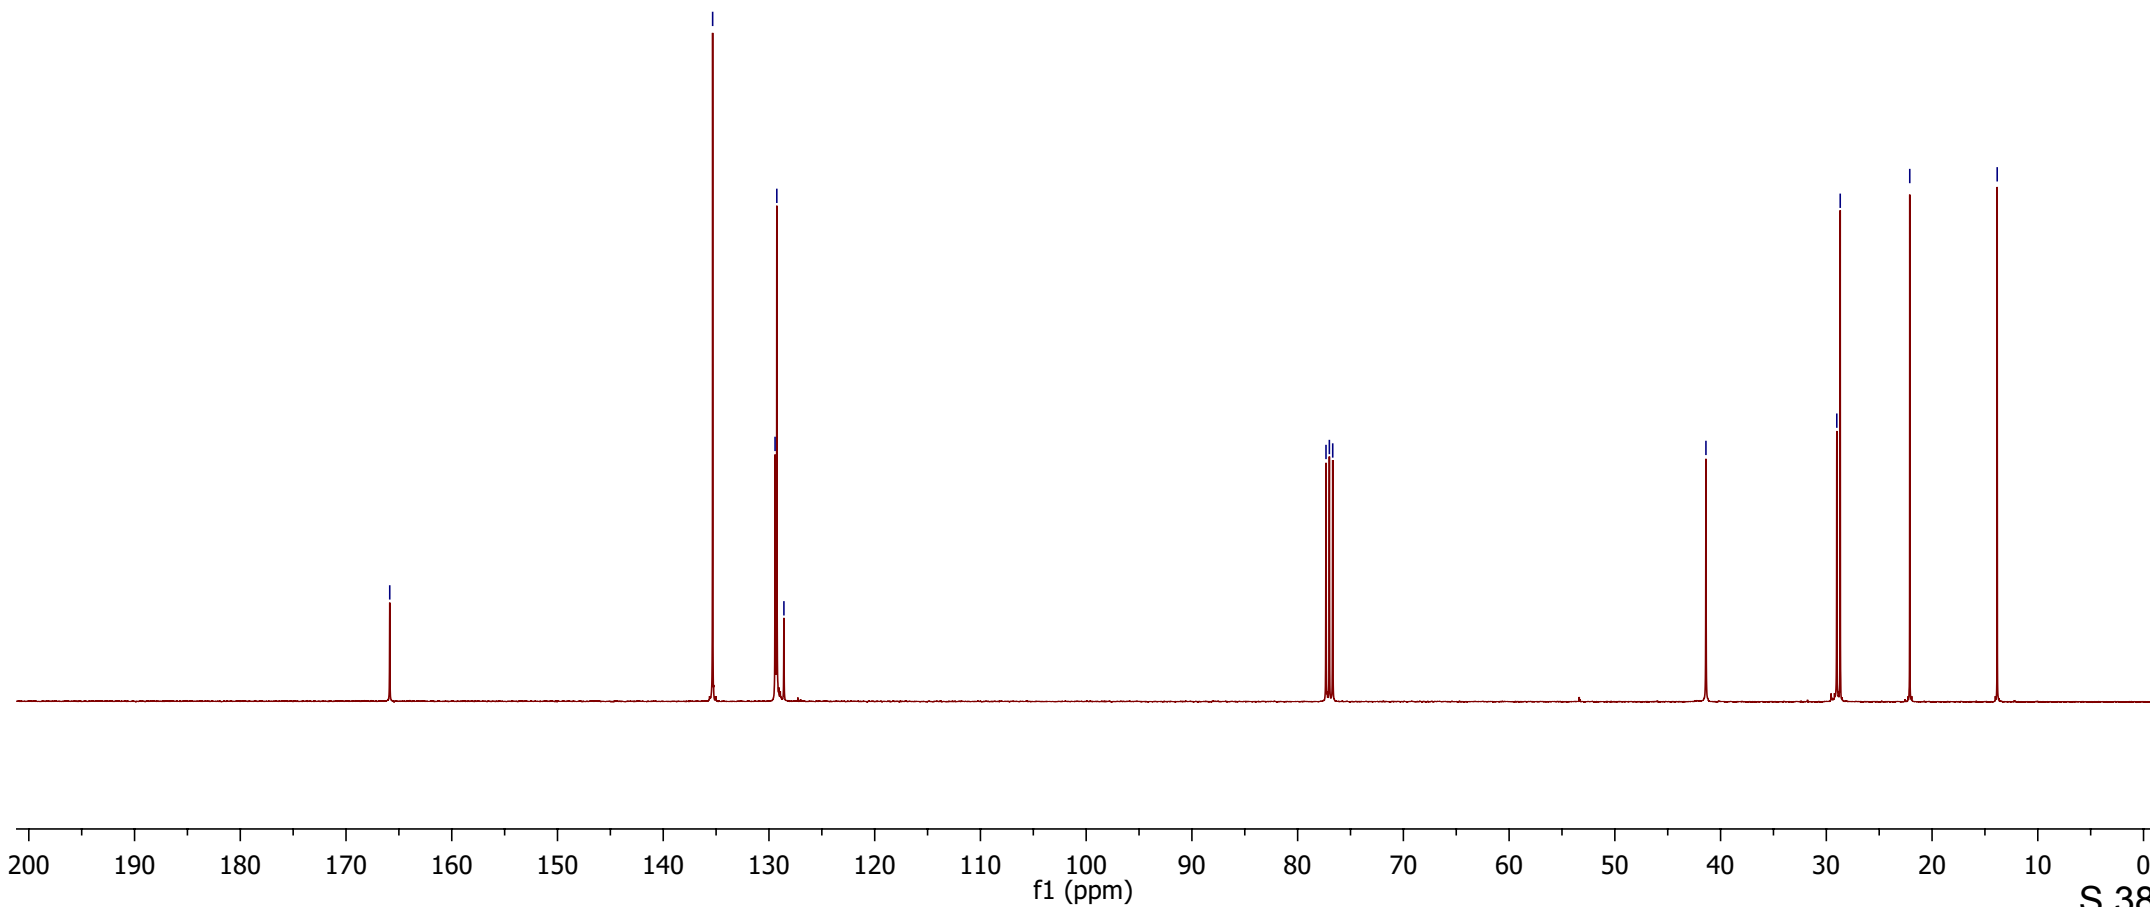

7.450  
7.428

6.910  
6.888

5.595

3.783

3.211  
3.194  
3.178  
3.161

1.453  
1.435  
1.417  
1.399  
1.381  
1.298  
1.280  
1.264  
1.246  
1.228  
1.212  
1.204  
1.187  
1.175  
1.153  
0.857  
0.839  
0.821

# <sup>1</sup>H NMR (400 MHz, CDCl<sub>3</sub>)

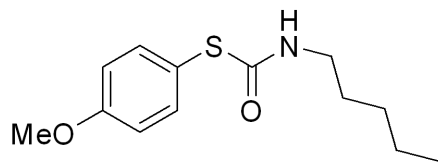

(3o)

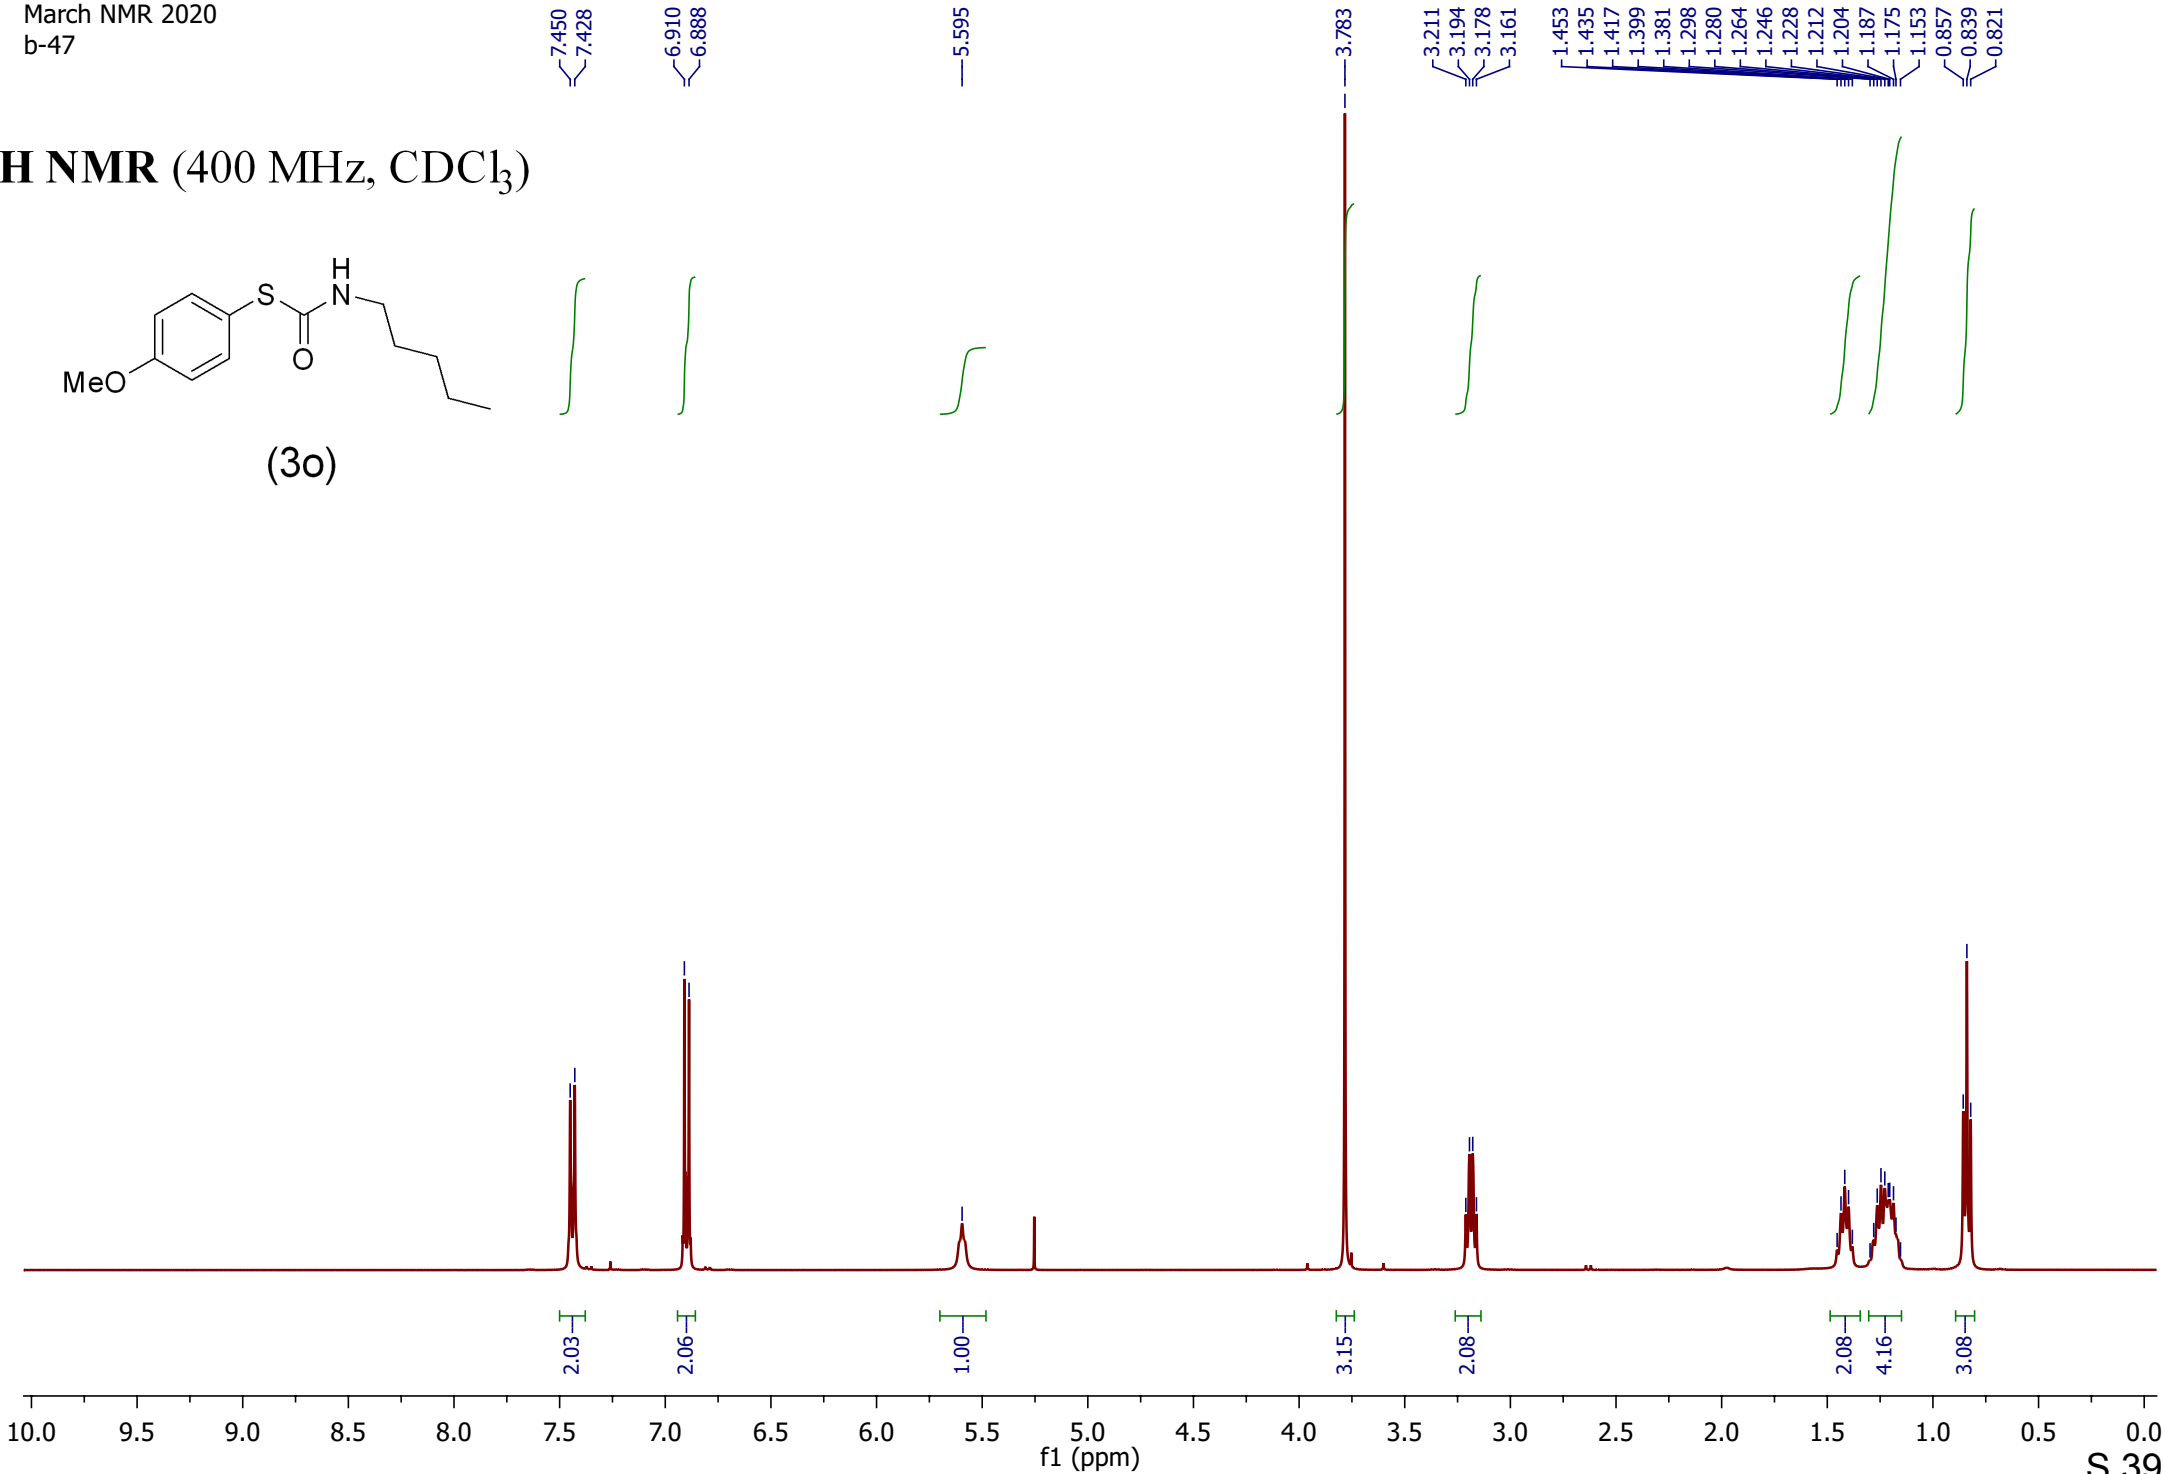

March NMR 2020  
b-47

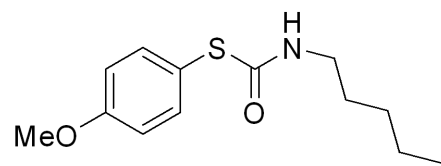

(3o)

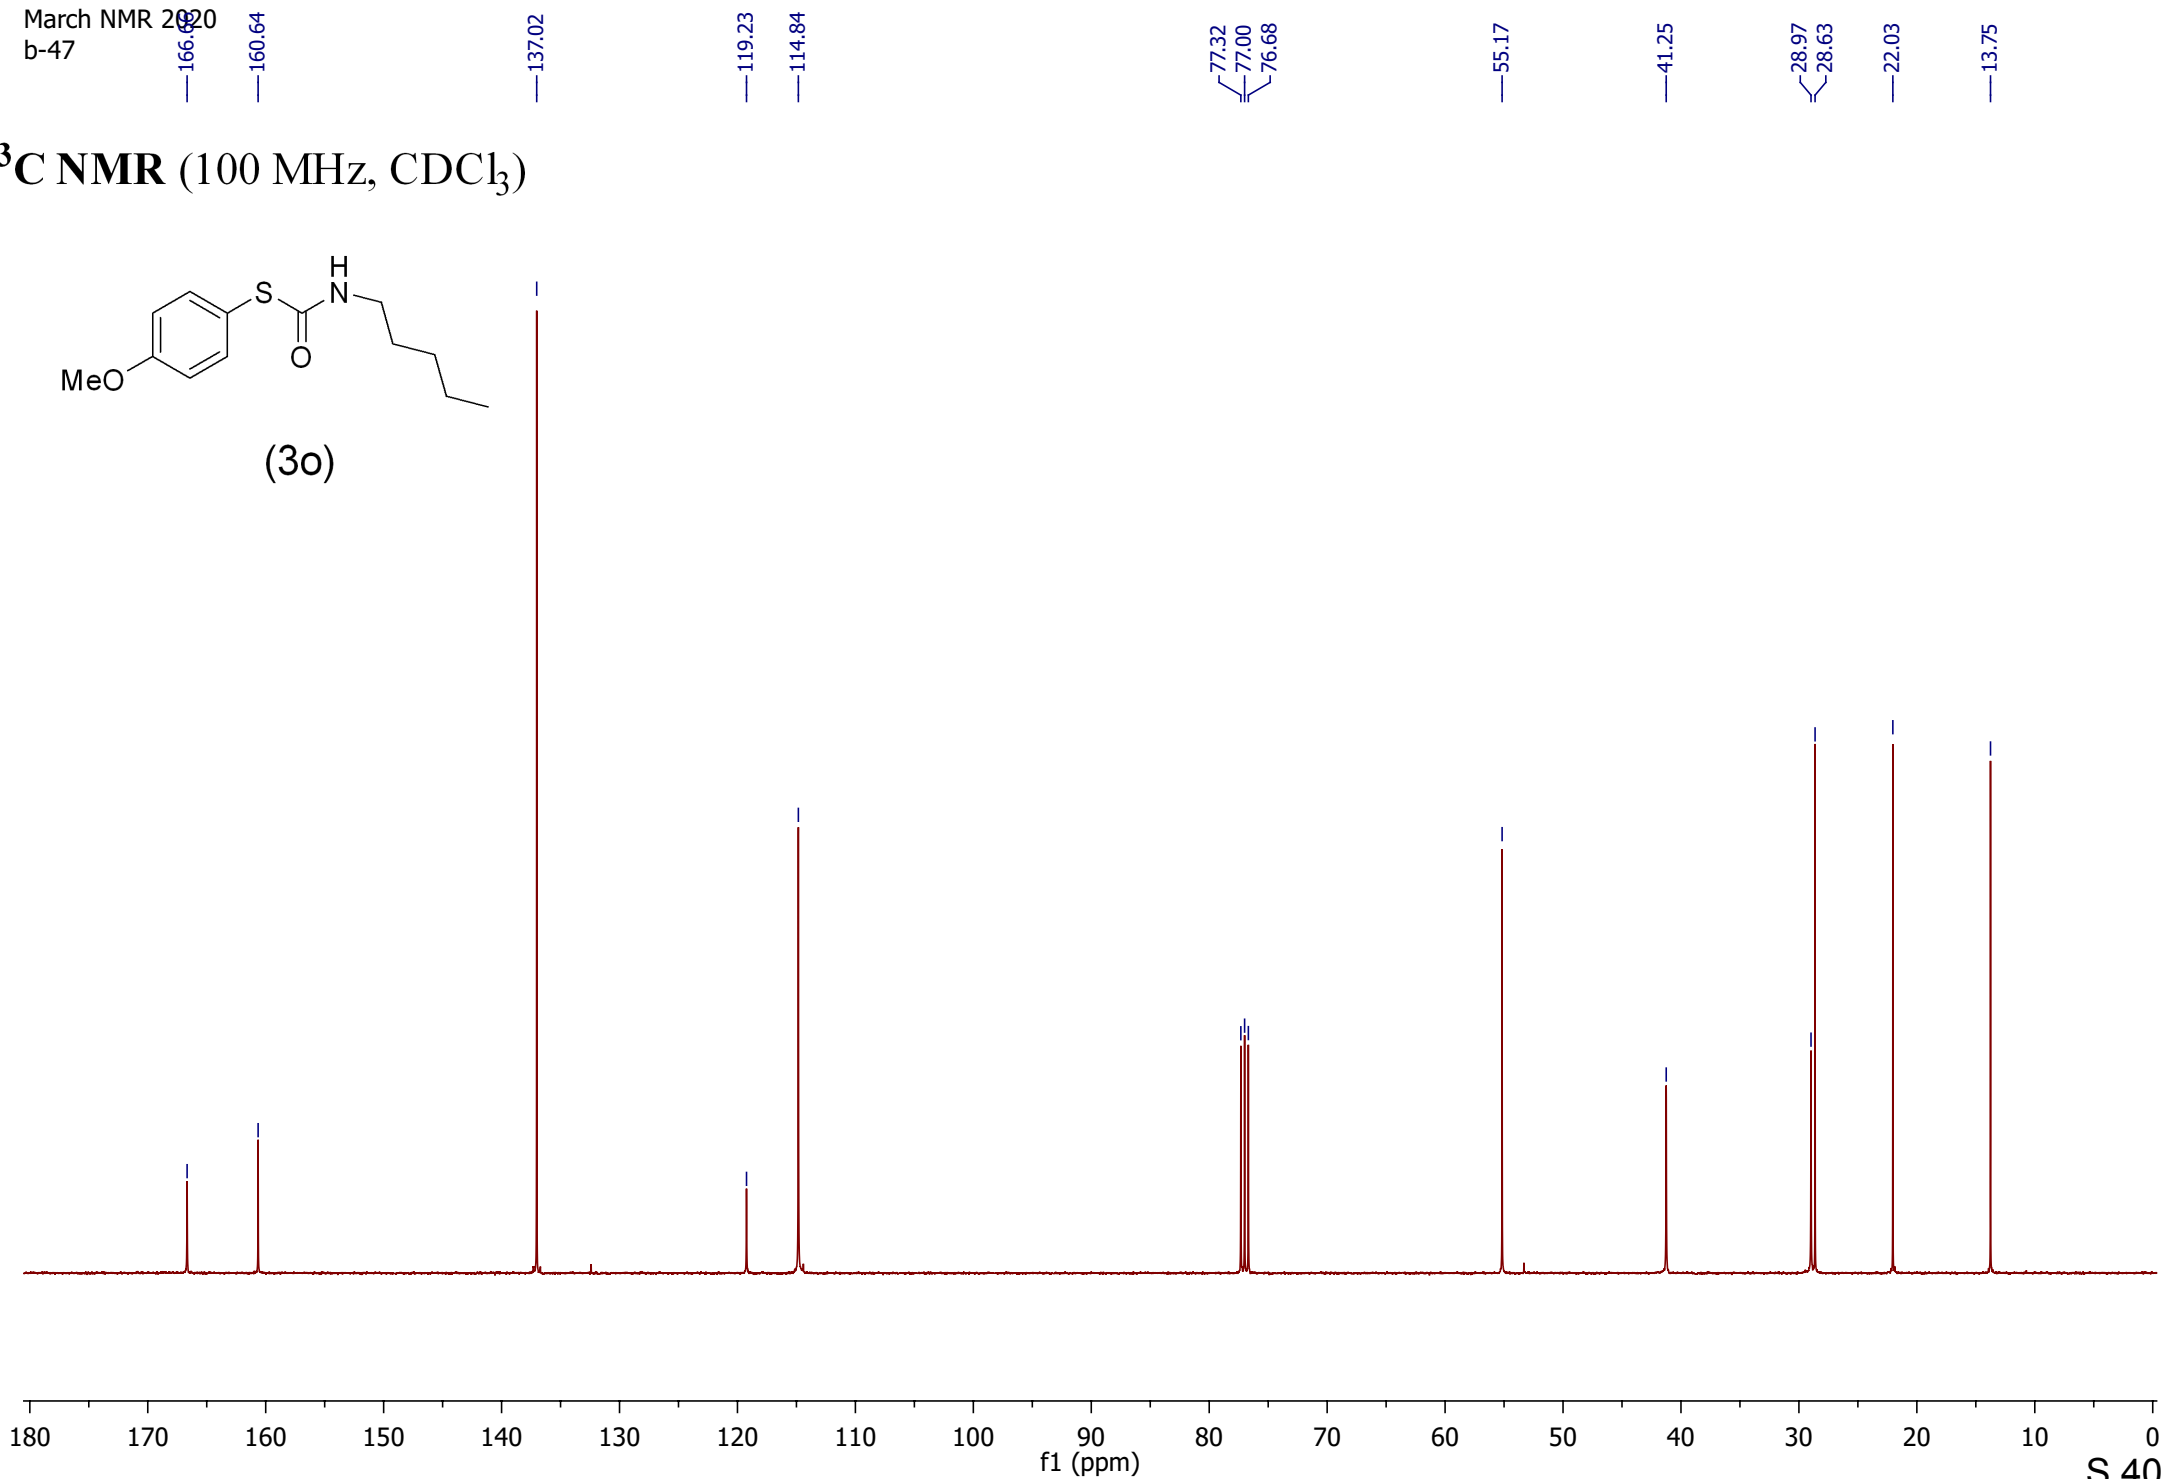

B series NMR  
B-07

7.54  
7.52  
7.52  
7.50  
7.26  
7.12  
7.10  
7.08

5.37

3.28  
3.26  
3.25  
3.23

1.64  
1.52  
1.50  
1.48  
1.46  
1.45  
1.32  
1.31  
1.29  
1.27  
1.26  
1.24  
1.23  
0.89  
0.88  
0.86

-0.01

$^1\text{H}$  NMR (400 MHz,  $\text{CDCl}_3$ )

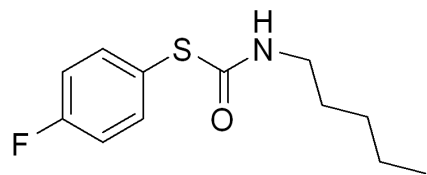

(3p)

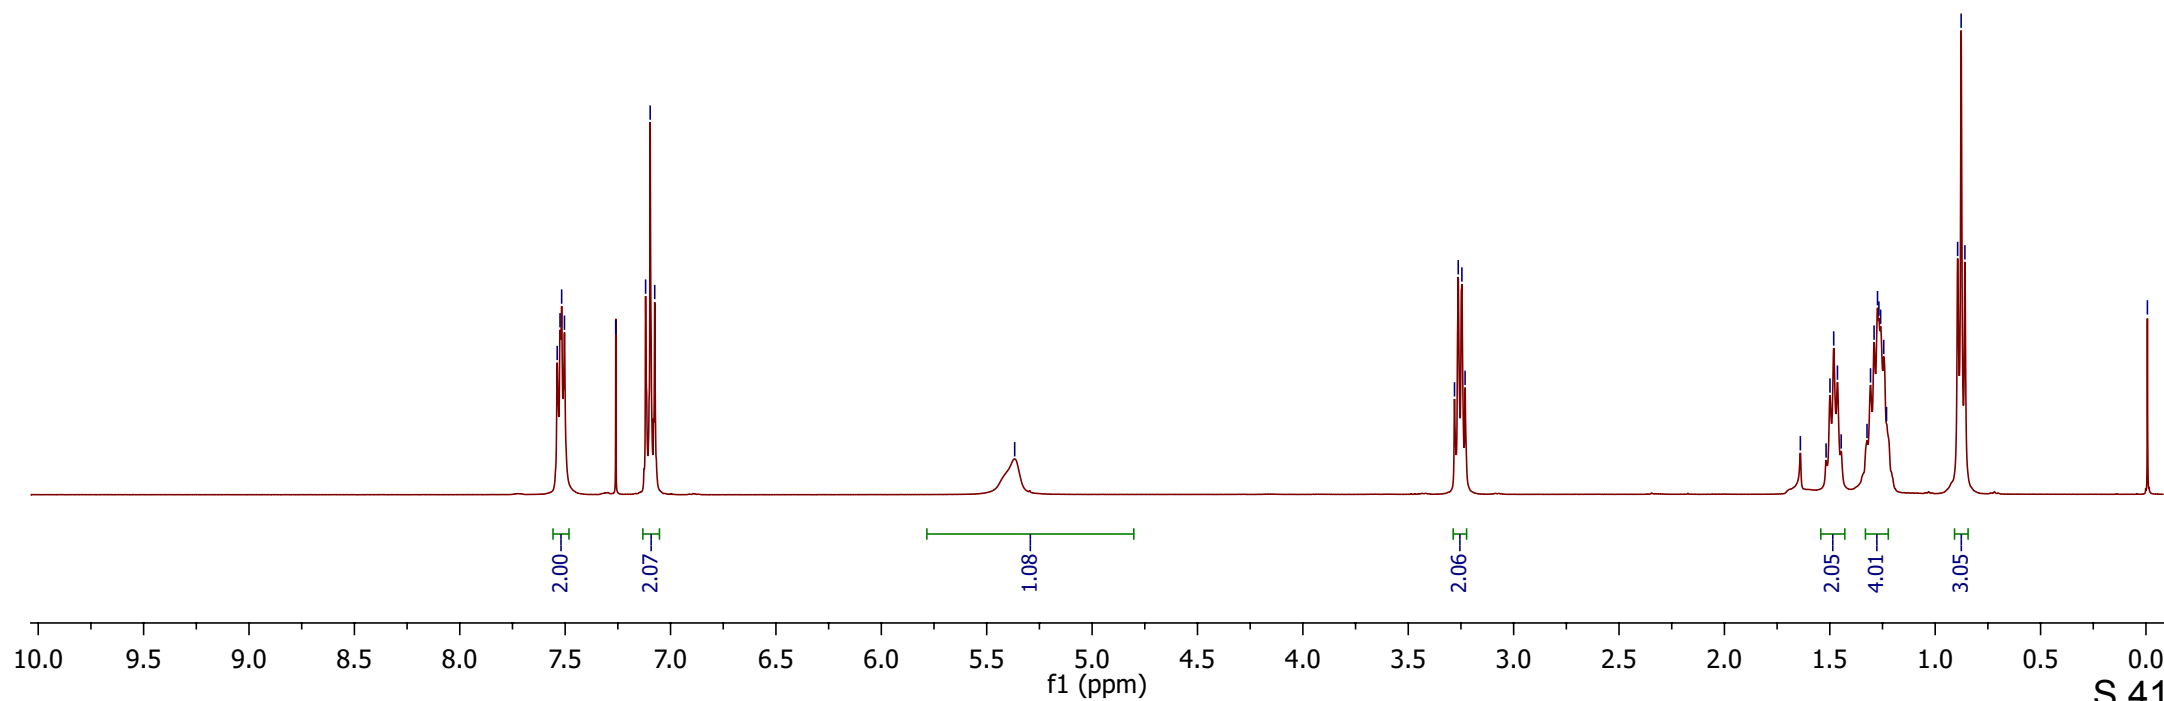

B series NMR  
B-07

165.61  
164.77  
162.28

137.60  
137.51

123.82

116.61  
116.40

77.32  
77.00  
76.68

41.60

29.18  
28.80

22.21

13.93

$^{13}\text{C}$  NMR (100 MHz,  $\text{CDCl}_3$ )

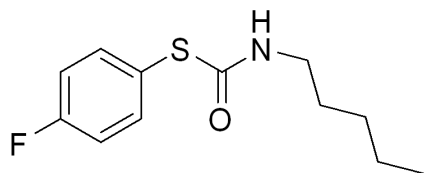

(3p)

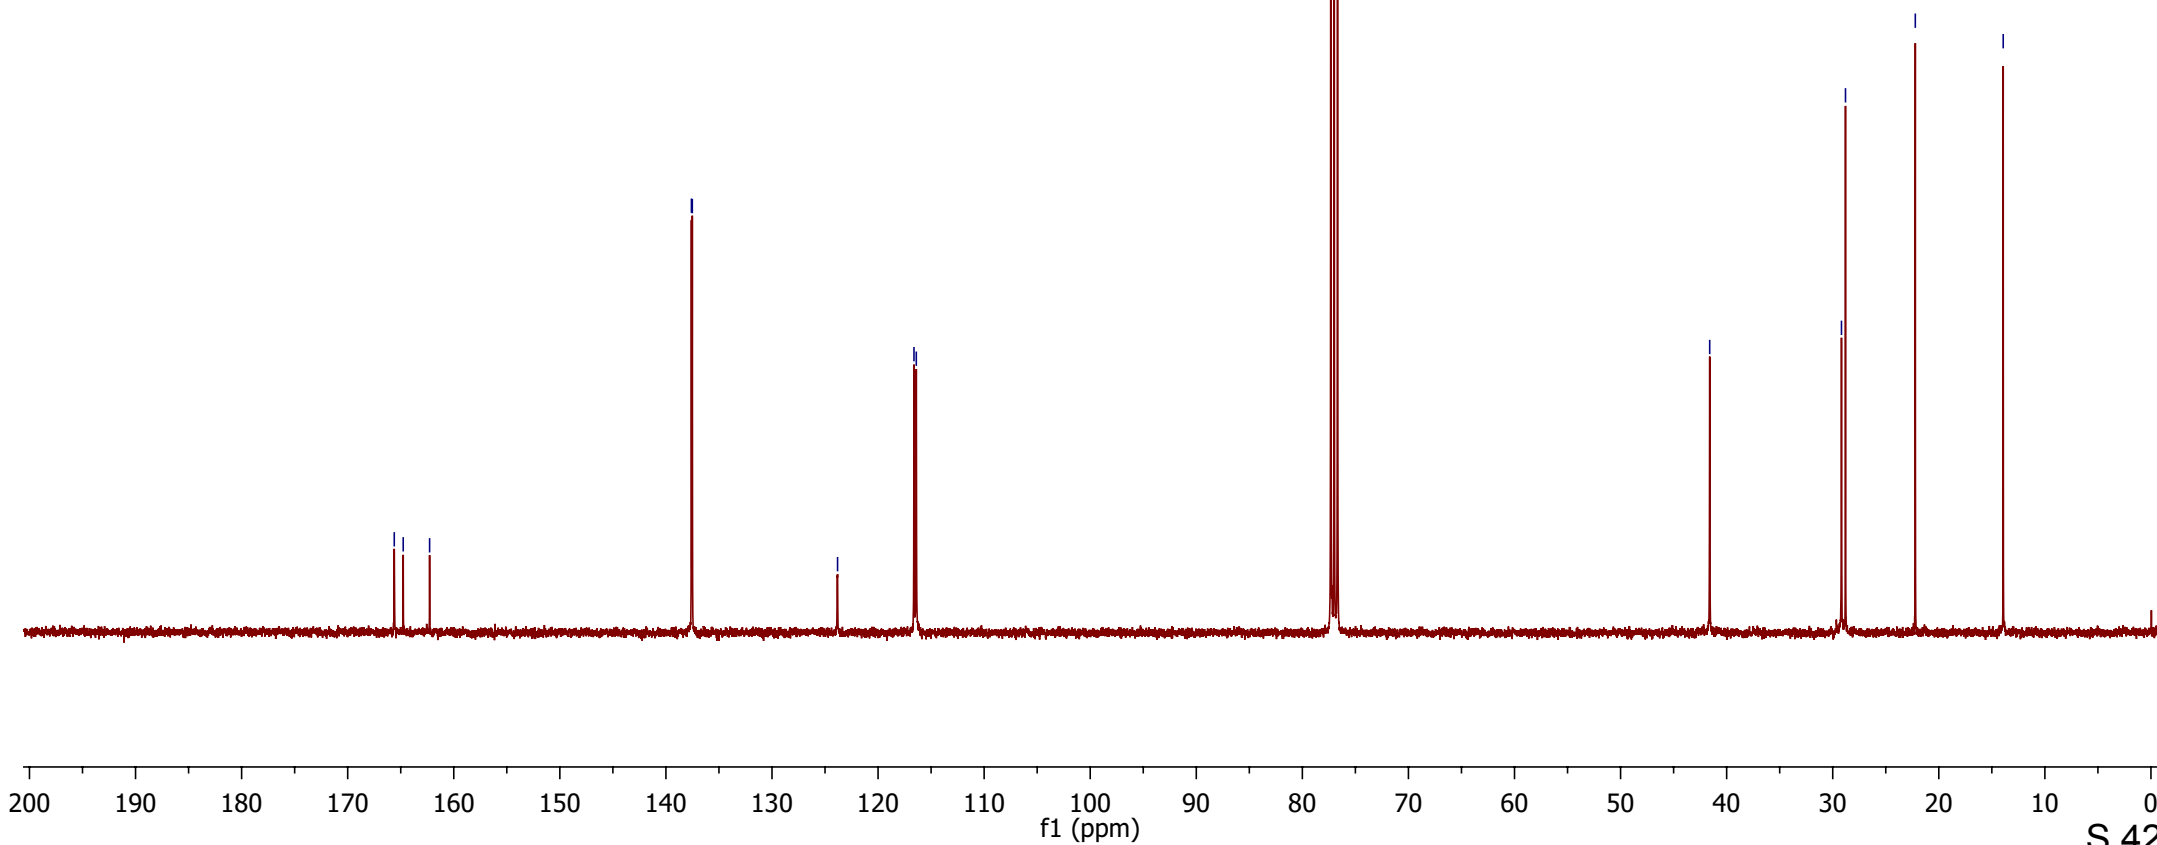

F-NMR  
B-07

$^{19}\text{F}$  NMR (376 MHz,  $\text{CDCl}_3$ )



(3p)

-110.95

10 0 -10 -20 -30 -40 -50 -60 -70 -80 -90 -100 -110 -120 -130 -140 -150 -160 -170 -180 -190 -200 -210  
f1 (ppm)

7.529  
7.508  
7.404  
7.383  
7.260

5.444

3.279  
3.261  
3.246  
3.228

1.521  
1.504  
1.486  
1.469  
1.310  
1.294  
1.278  
1.248  
1.214  
0.897  
0.880  
0.862

# <sup>1</sup>H NMR (400 MHz, CDCl<sub>3</sub>)

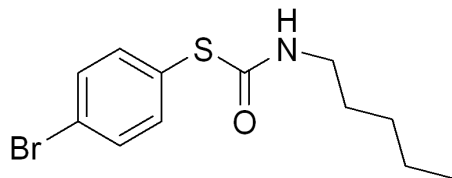

(3q)

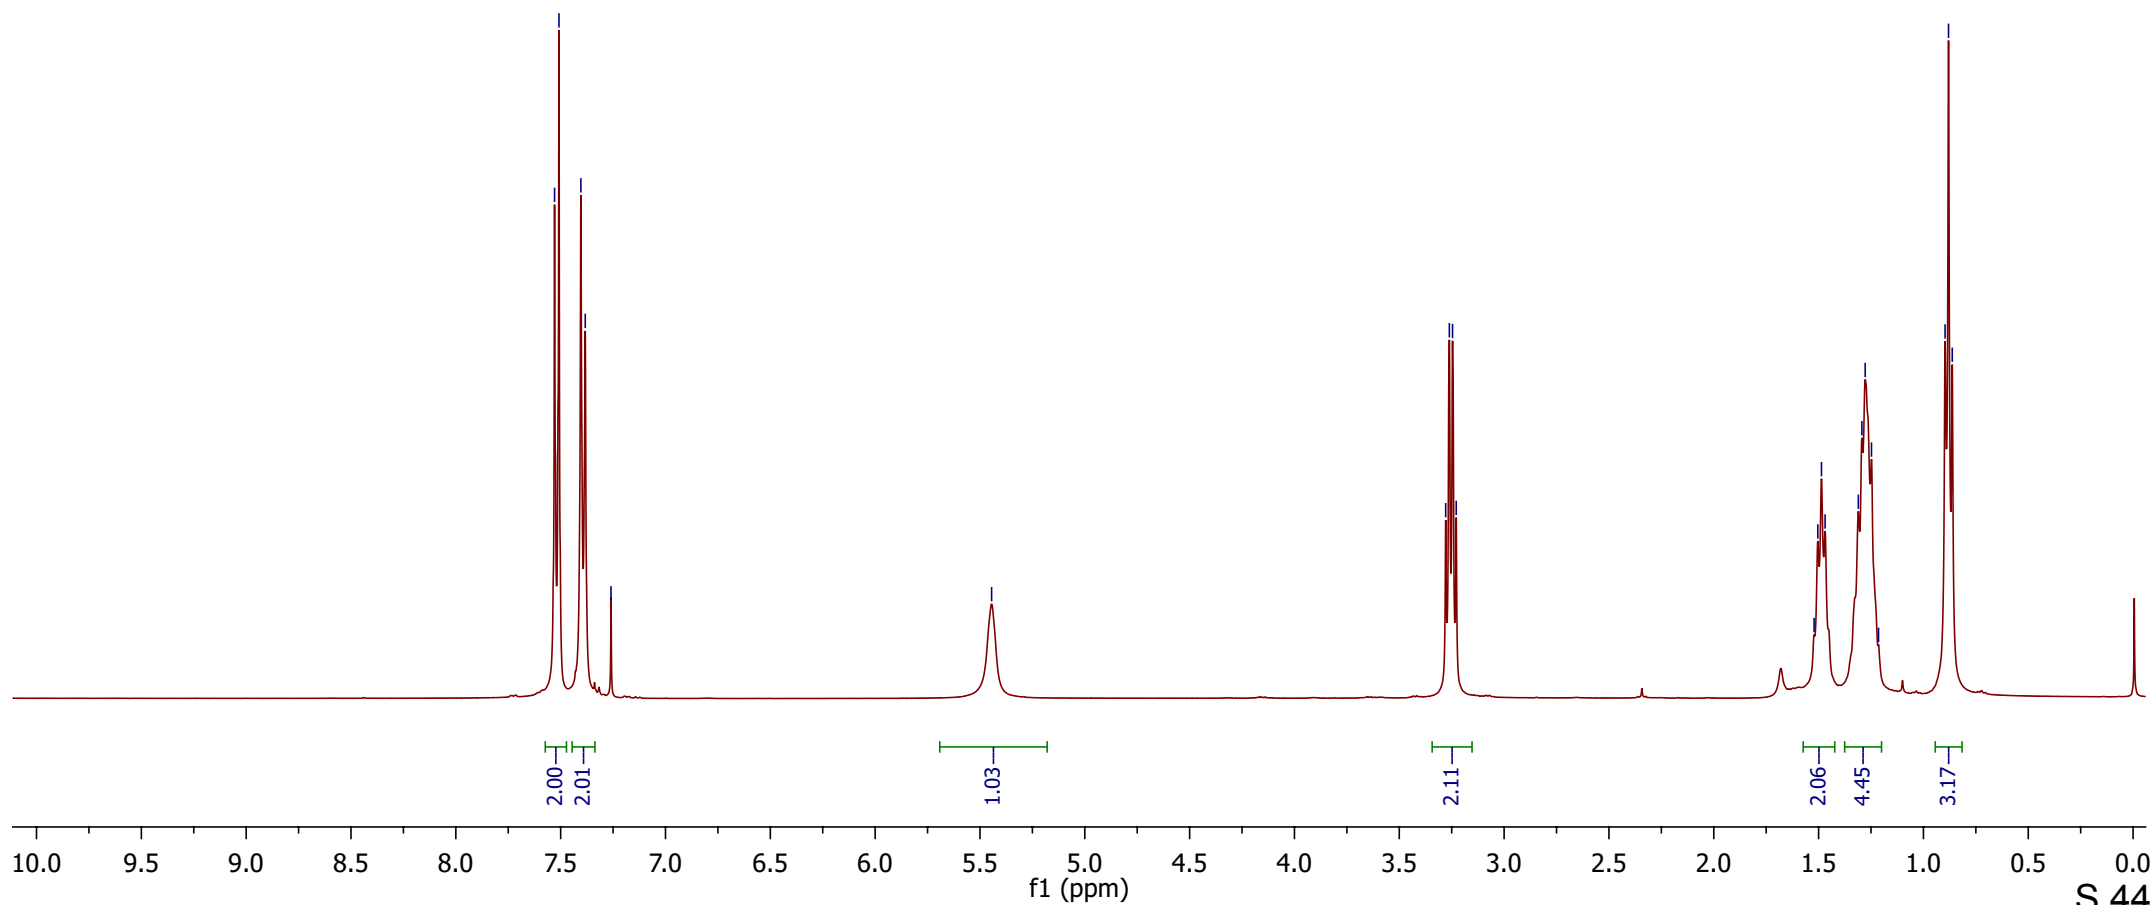



164.89

136.73

132.37

127.65

124.07

77.32

77.00

76.68

41.66

29.17

28.79

22.20

13.91

# <sup>13</sup>C NMR (100 MHz, CDCl<sub>3</sub>)

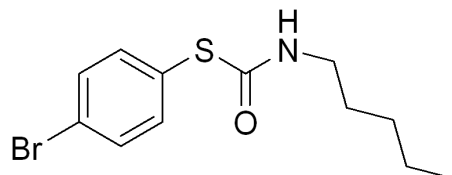

(3q)

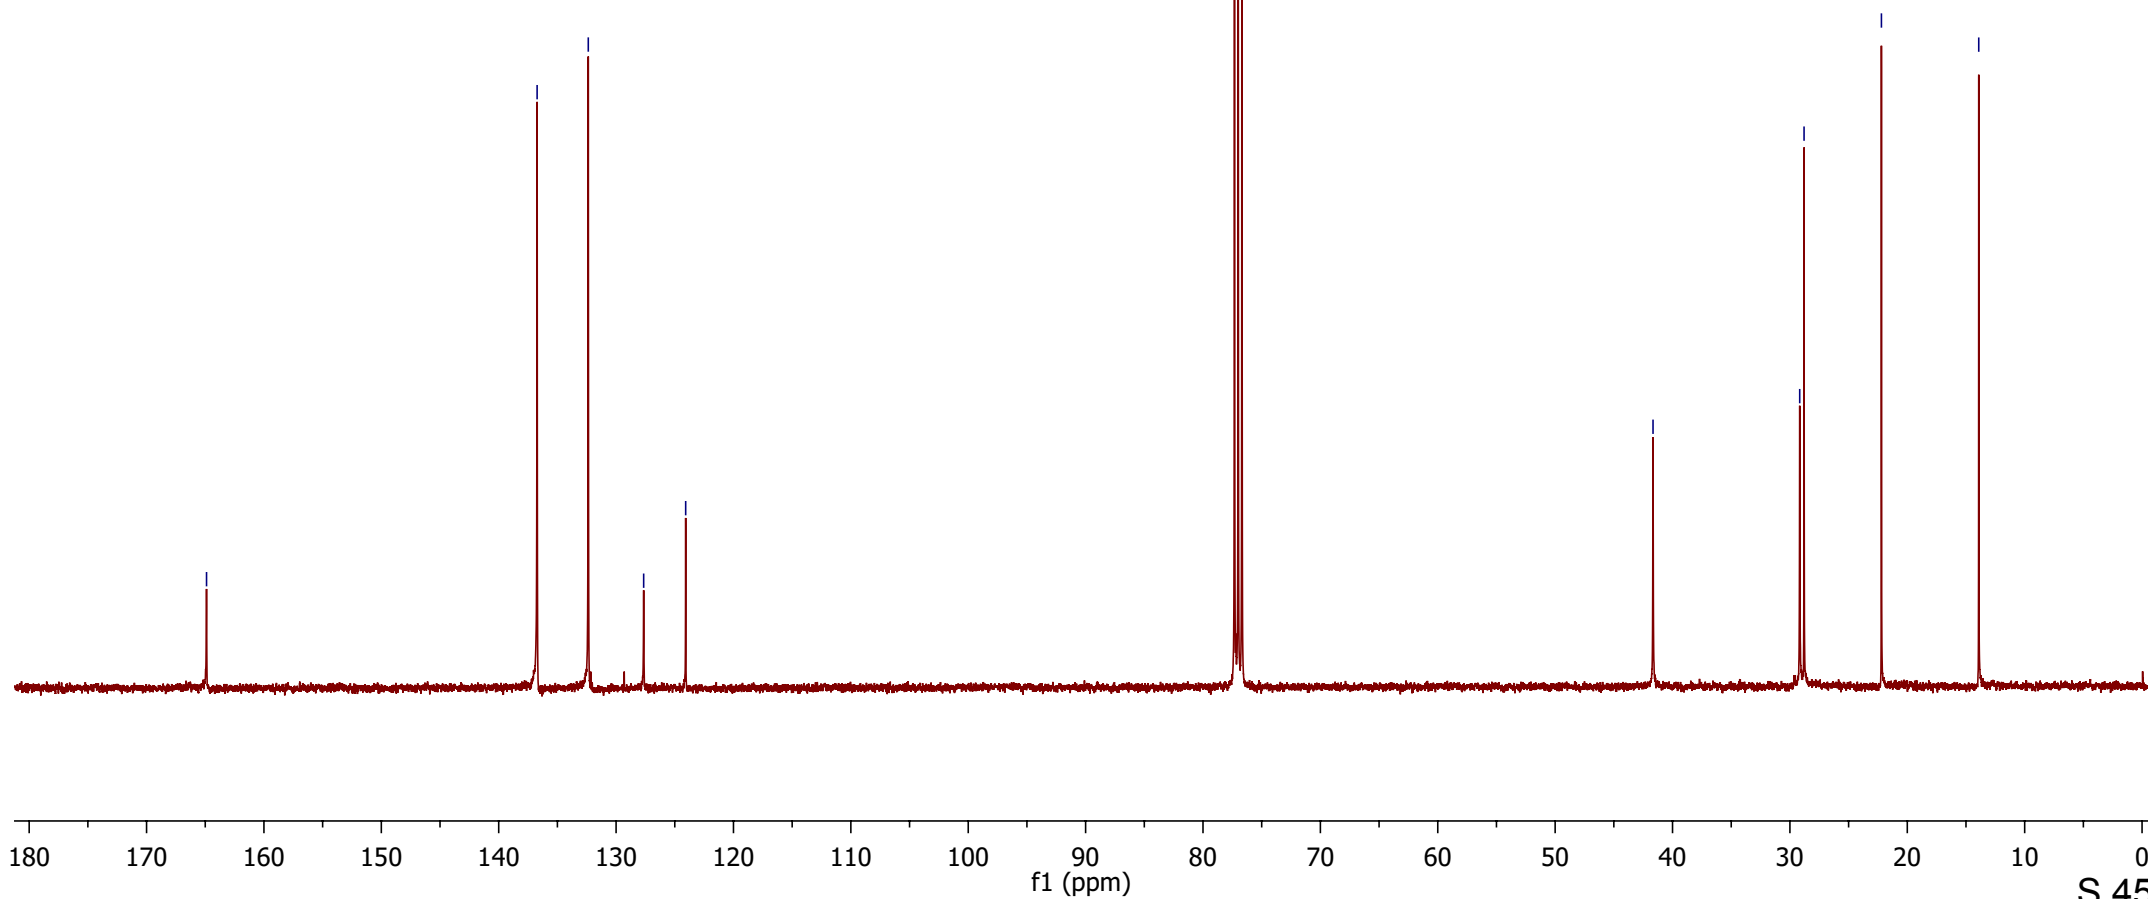

**<sup>1</sup>H NMR (400 MHz, CDCl<sub>3</sub>)**

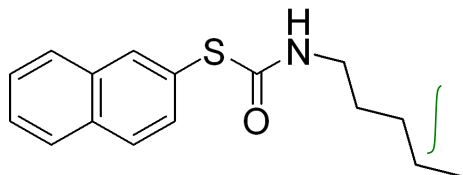

**(3r)**

8.095  
7.881  
7.865  
7.852  
7.837  
7.608  
7.591  
7.563  
7.552  
7.549  
7.545  
7.540  
7.534  
7.530  
7.516  
7.260

5.378

3.262  
3.249

1.478  
1.465  
1.452  
1.430  
1.292  
1.266  
1.228  
0.875  
0.861  
0.847

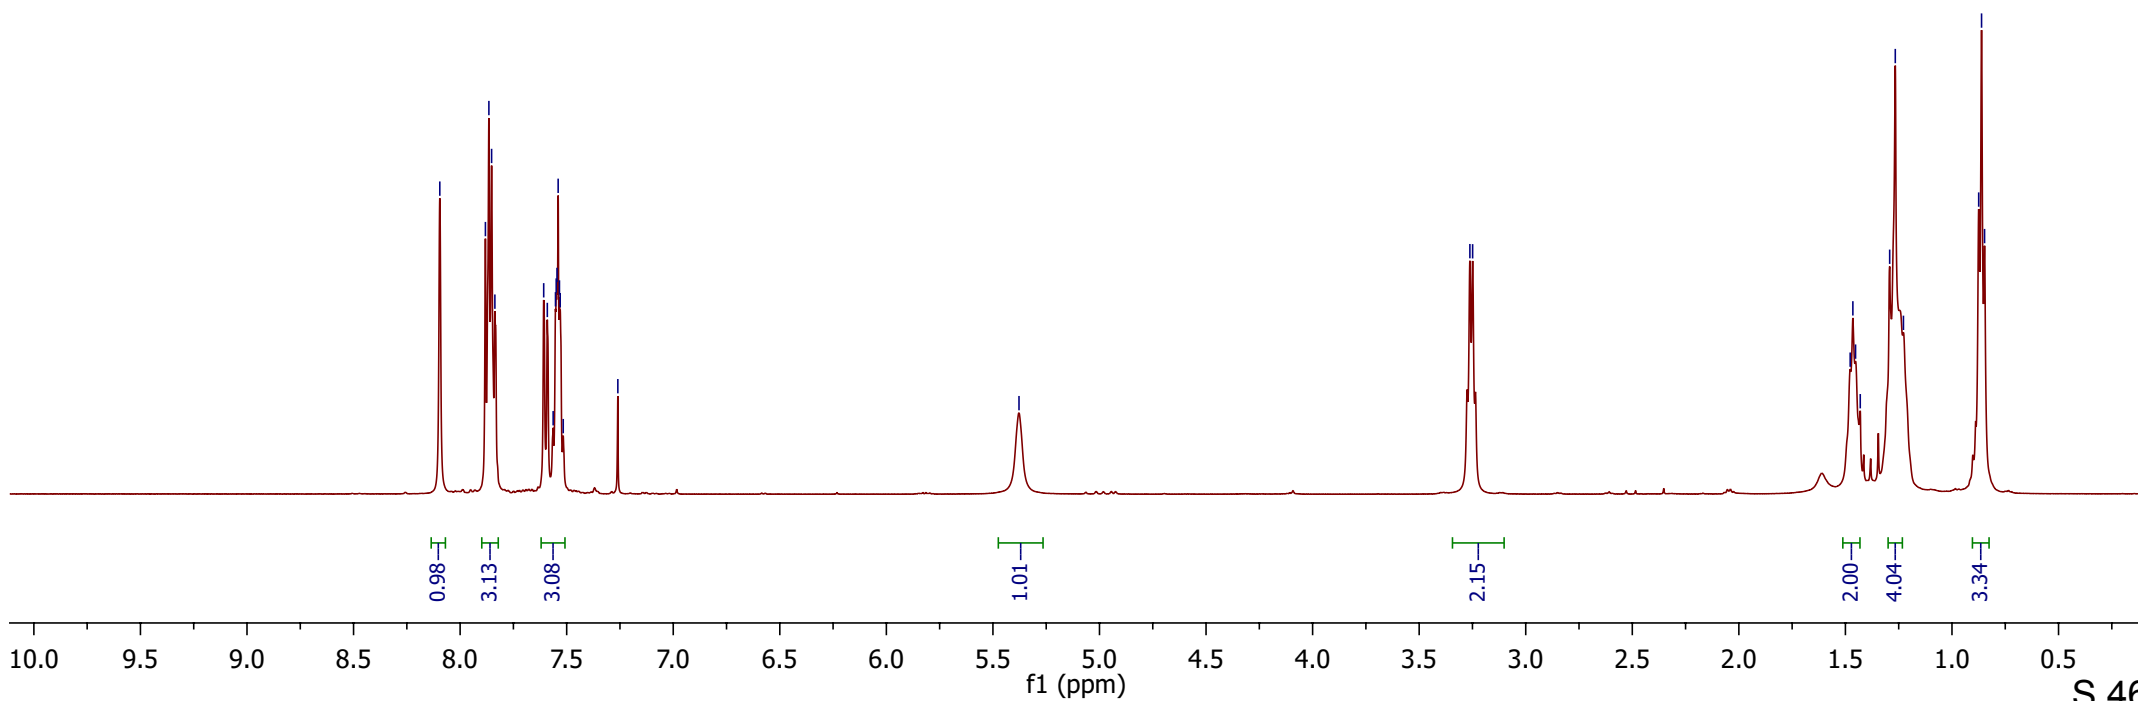

**$^{13}\text{C}$  NMR (100 MHz,  $\text{CDCl}_3$ )**

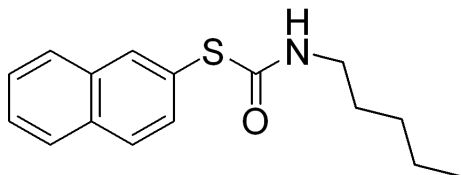

**(3r)**

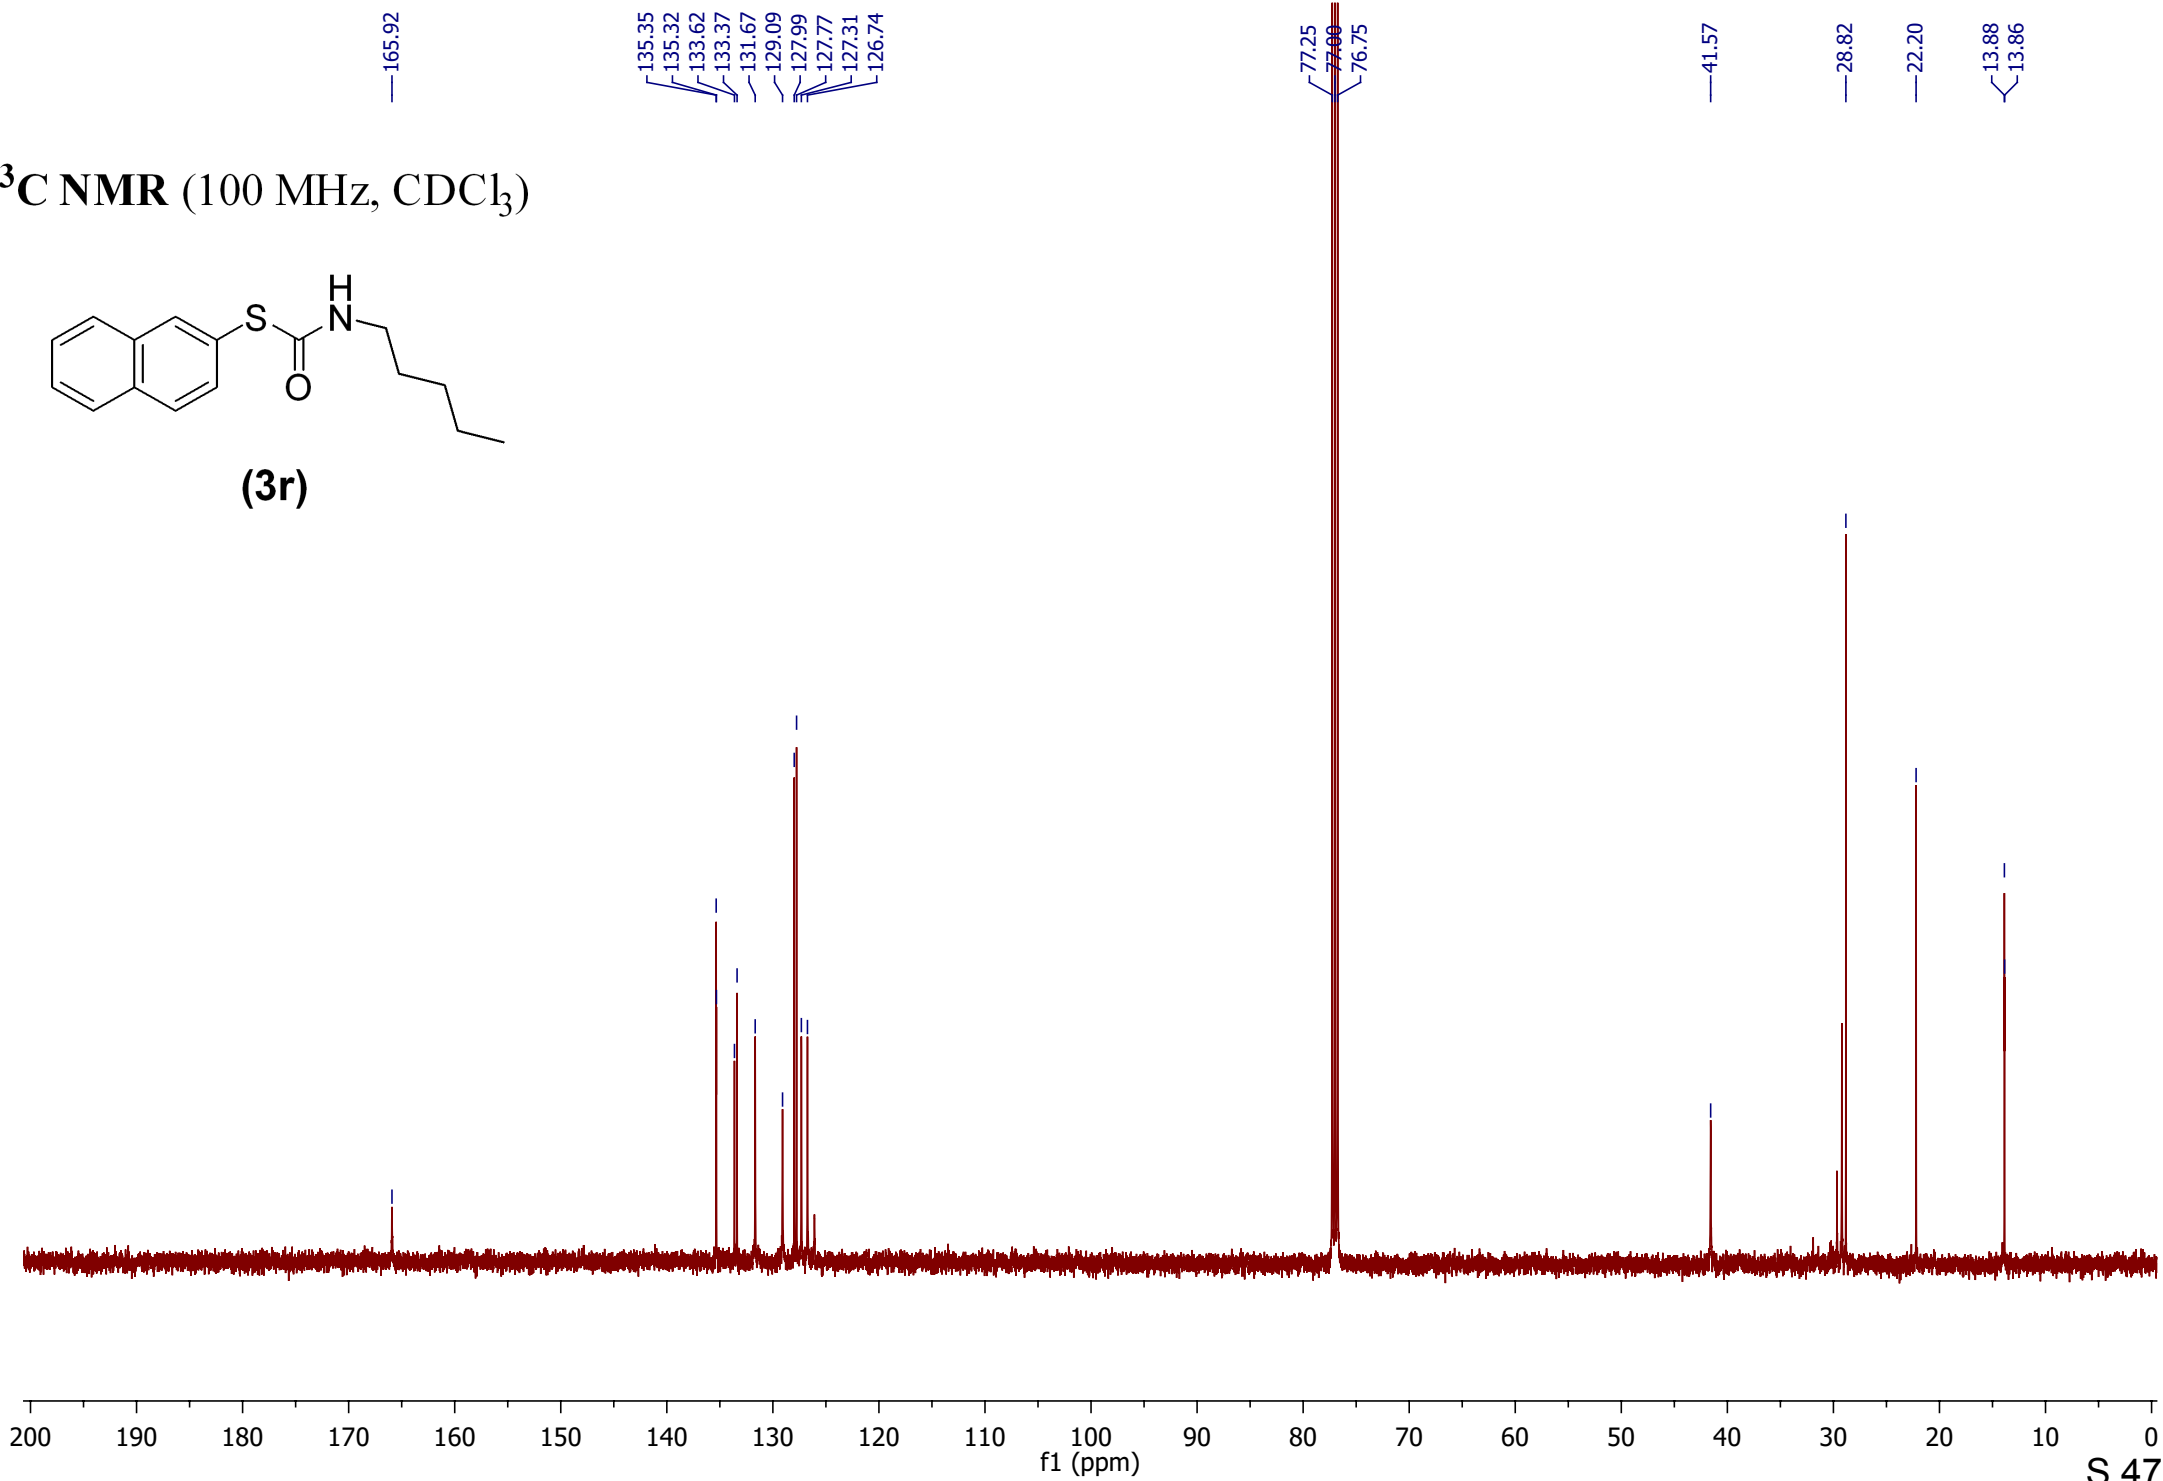

New NMR  
b56

$^1\text{H}$  NMR (400 MHz,  $\text{CDCl}_3$ )

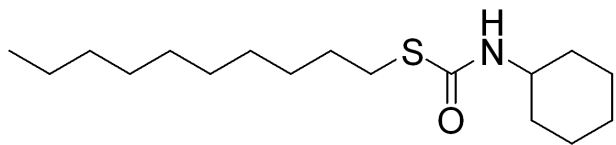

(3s)

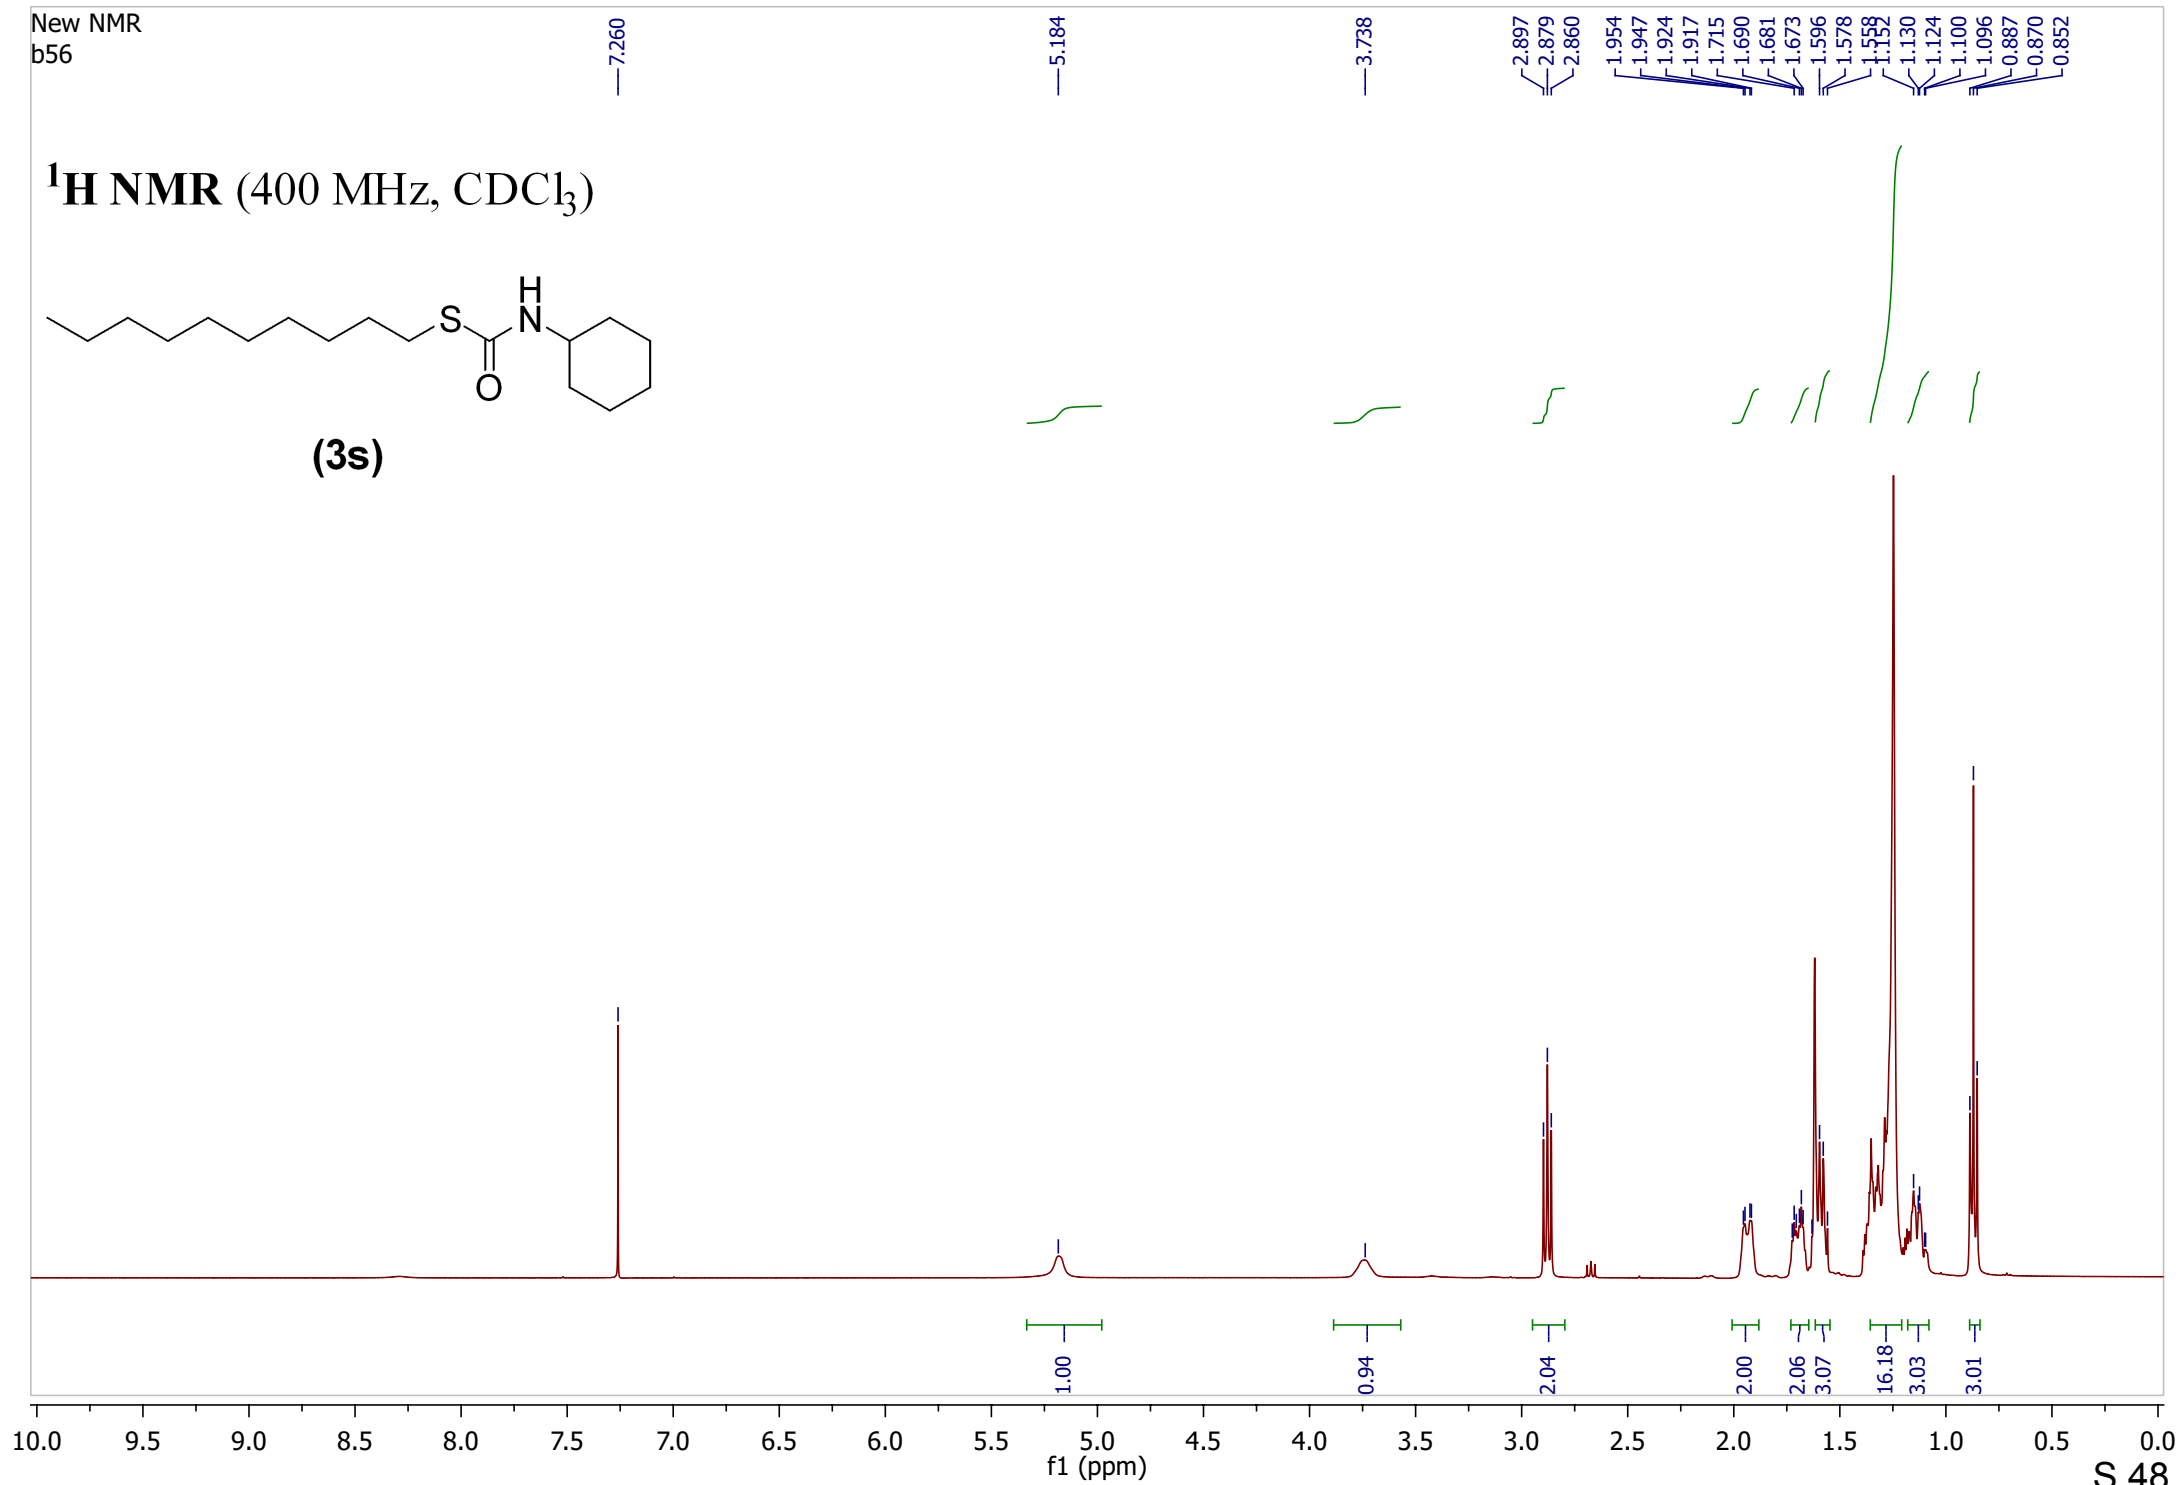

New NMR  
b56

$^{13}\text{C}$  NMR (100 MHz,  $\text{CDCl}_3$ )



(3s)

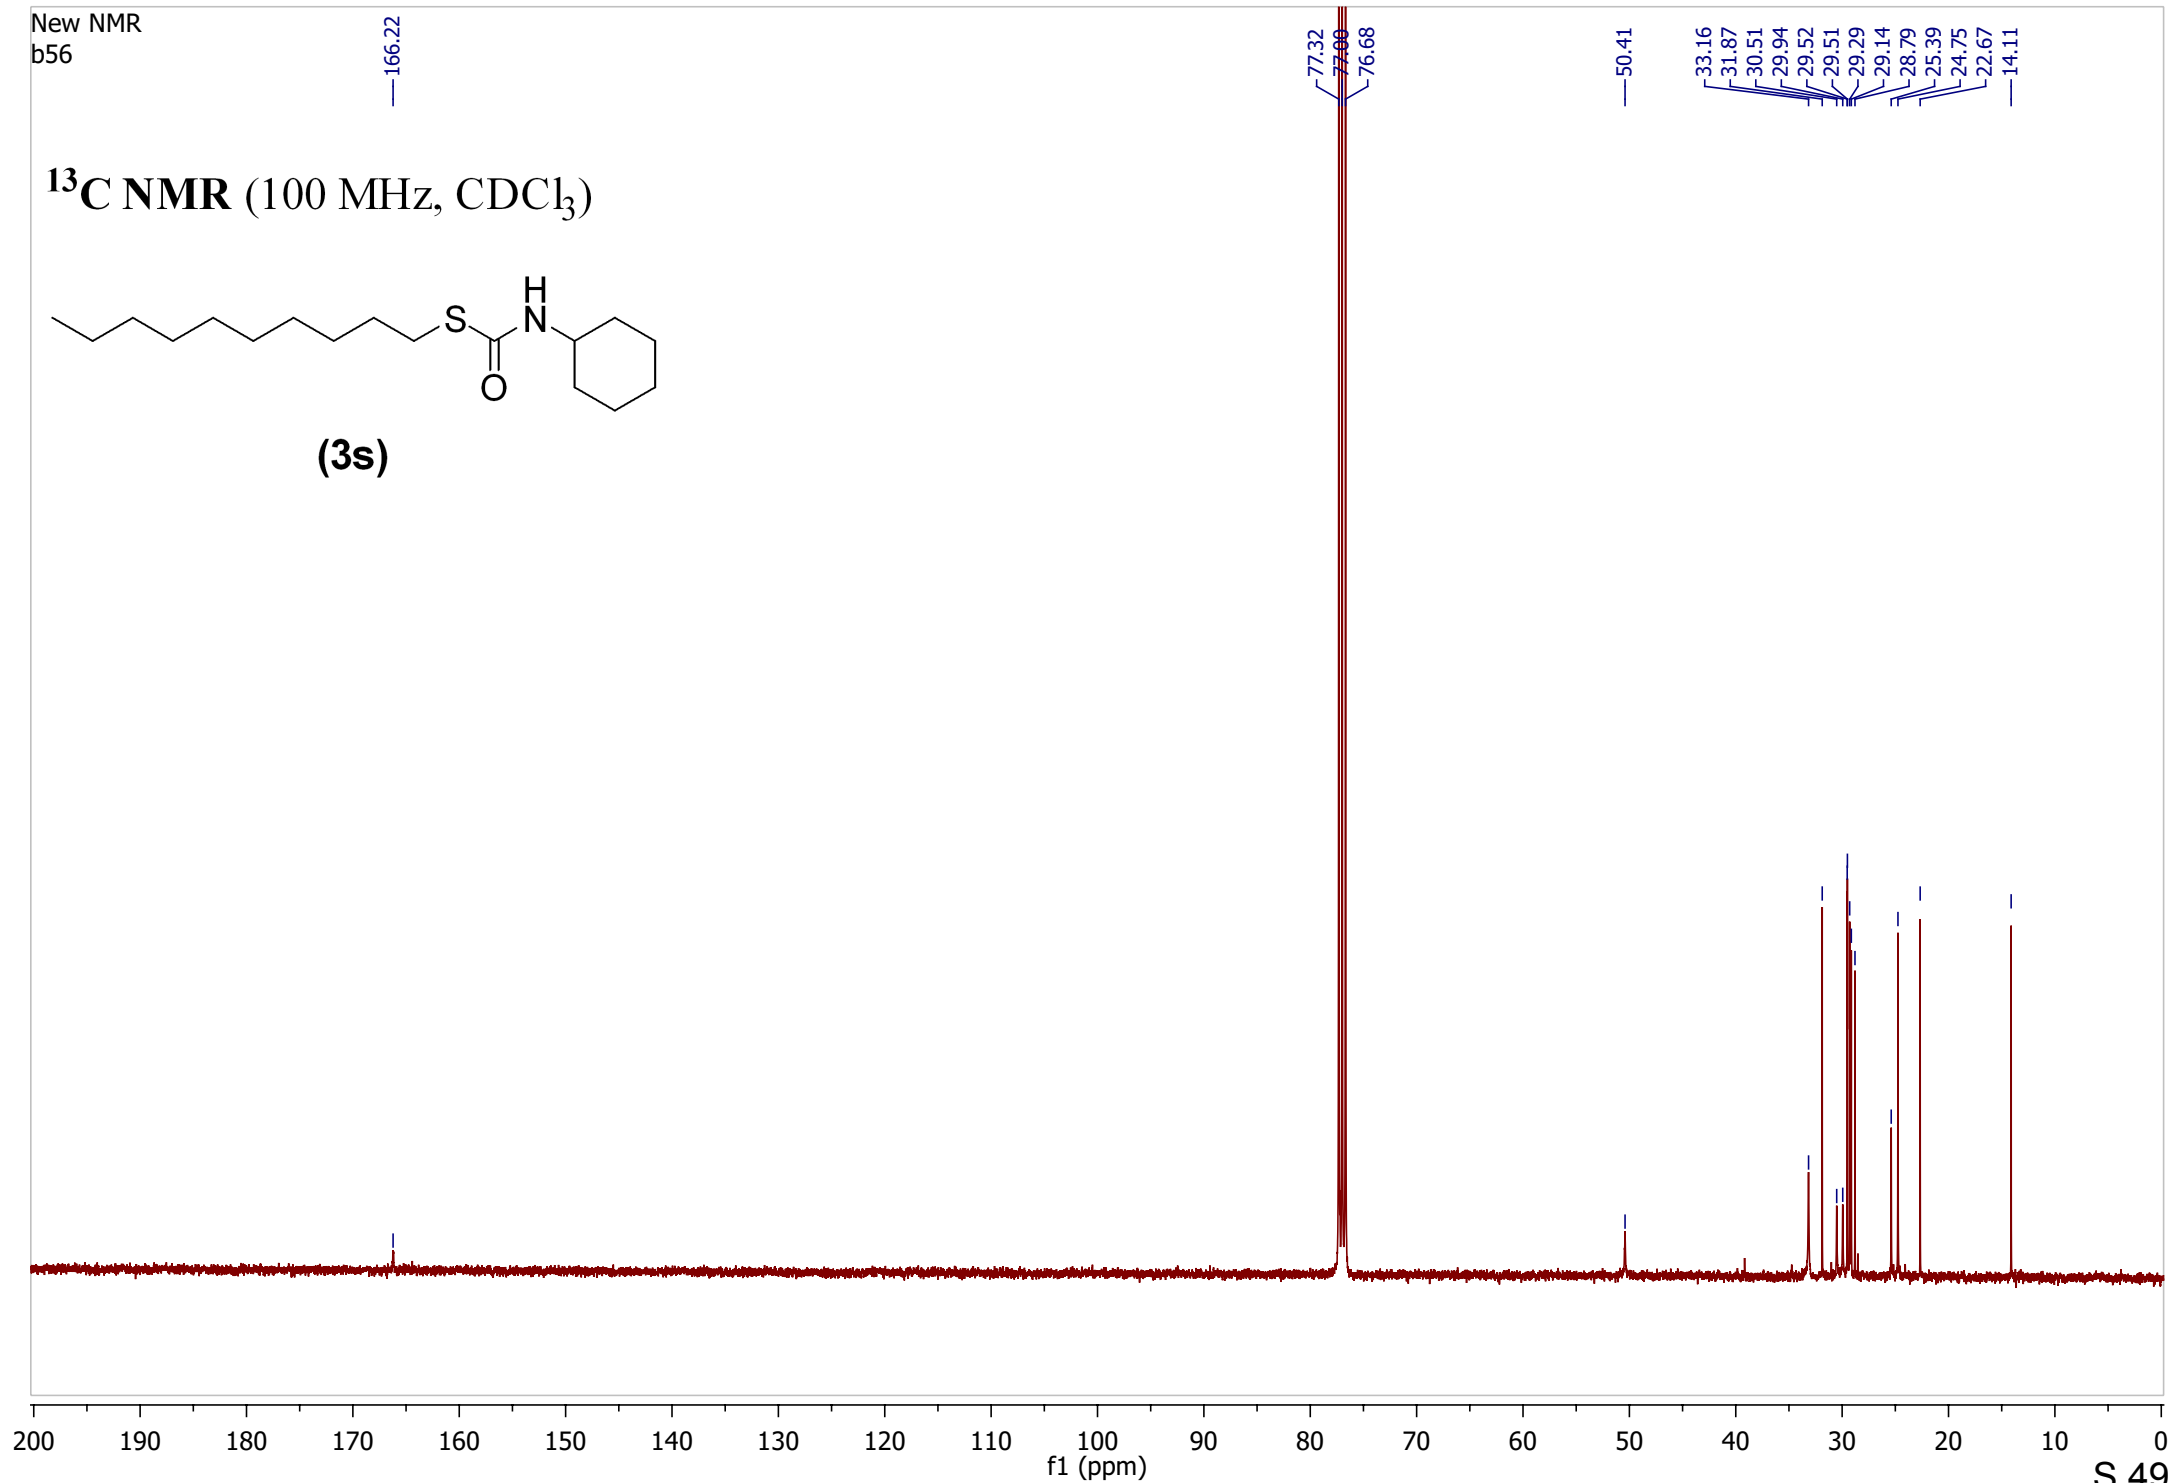

Aug25-2021  
BKS-51

$^1\text{H}$  NMR (400 MHz,  $\text{CDCl}_3$ )

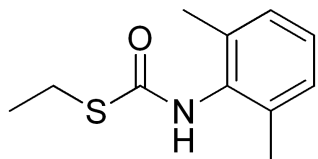

(3u)

7.260  
7.182  
7.101  
6.876  
6.659

2.973  
2.841

2.306

1.676

1.333  
1.286  
1.255  
1.237

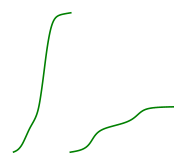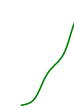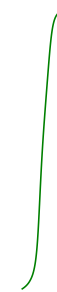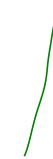

10.0 9.5 9.0 8.5 8.0 7.5 7.0 6.5 6.0 5.5 5.0 4.5 4.0 3.5 3.0 2.5 2.0 1.5 1.0 0.5 0.0

f1 (ppm)

S 50

Aug25-2021  
BKS-51

171.23

165.90

138.18

135.64

132.79

128.82

128.36

127.47

77.32

77.00

76.68

24.56

24.07

18.35

15.63

15.24

$^{13}\text{C}$  NMR (100 MHz,  $\text{CDCl}_3$ )



(3u)

200 190 180 170 160 150 140 130 120 110 100 90 80 70 60 50 40 30 20 10 0

f1 (ppm)

S 51

Aug25-2021  
BKS-50

$^1\text{H}$  NMR (400 MHz,  $\text{CDCl}_3$ )

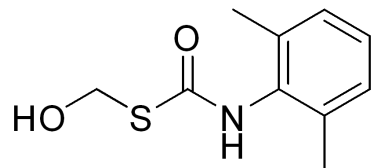

(3v)

7.260  
7.230  
7.213  
7.196  
7.130  
7.112  
7.079  
6.886  
6.691

3.395  
3.388  
3.266

2.304  
2.246

10.0 9.5 9.0 8.5 8.0 7.5 7.0 6.5 6.0 5.5 5.0 4.5 4.0 3.5 3.0 2.5 2.0 1.5 1.0 0.5 0.0  
f1 (ppm)



Aug25-2021  
BKS-50

169.70

164.54

138.42

135.76

132.36

129.37

128.79

127.96

77.54

77.33

76.91

33.12

32.58

19.60

**$^{13}\text{C}$  NMR (100 MHz,  $\text{CDCl}_3$ )**

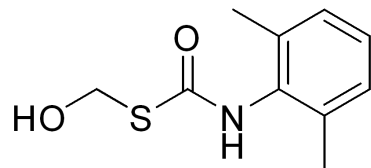

**(3v)**

200 190 180 170 160 150 140 130 120 110 100 90 80 70 60 50 40 30 20 10 0

f1 (ppm)

Aug25-2021  
BKS-55

7.361  
7.357  
7.352  
7.339  
7.315  
7.312  
7.308  
7.295  
7.291  
7.280  
7.276  
7.271  
7.260  
7.249  
7.246  
7.242  
7.234  
7.228  
7.221  
7.213  
7.210  
7.206

<sup>1</sup>H NMR (400 MHz, CDCl<sub>3</sub>)

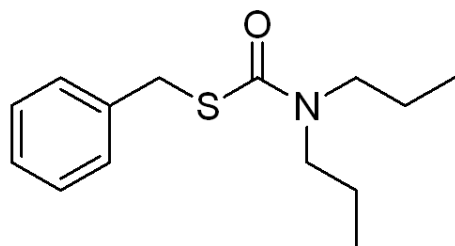

(3w)

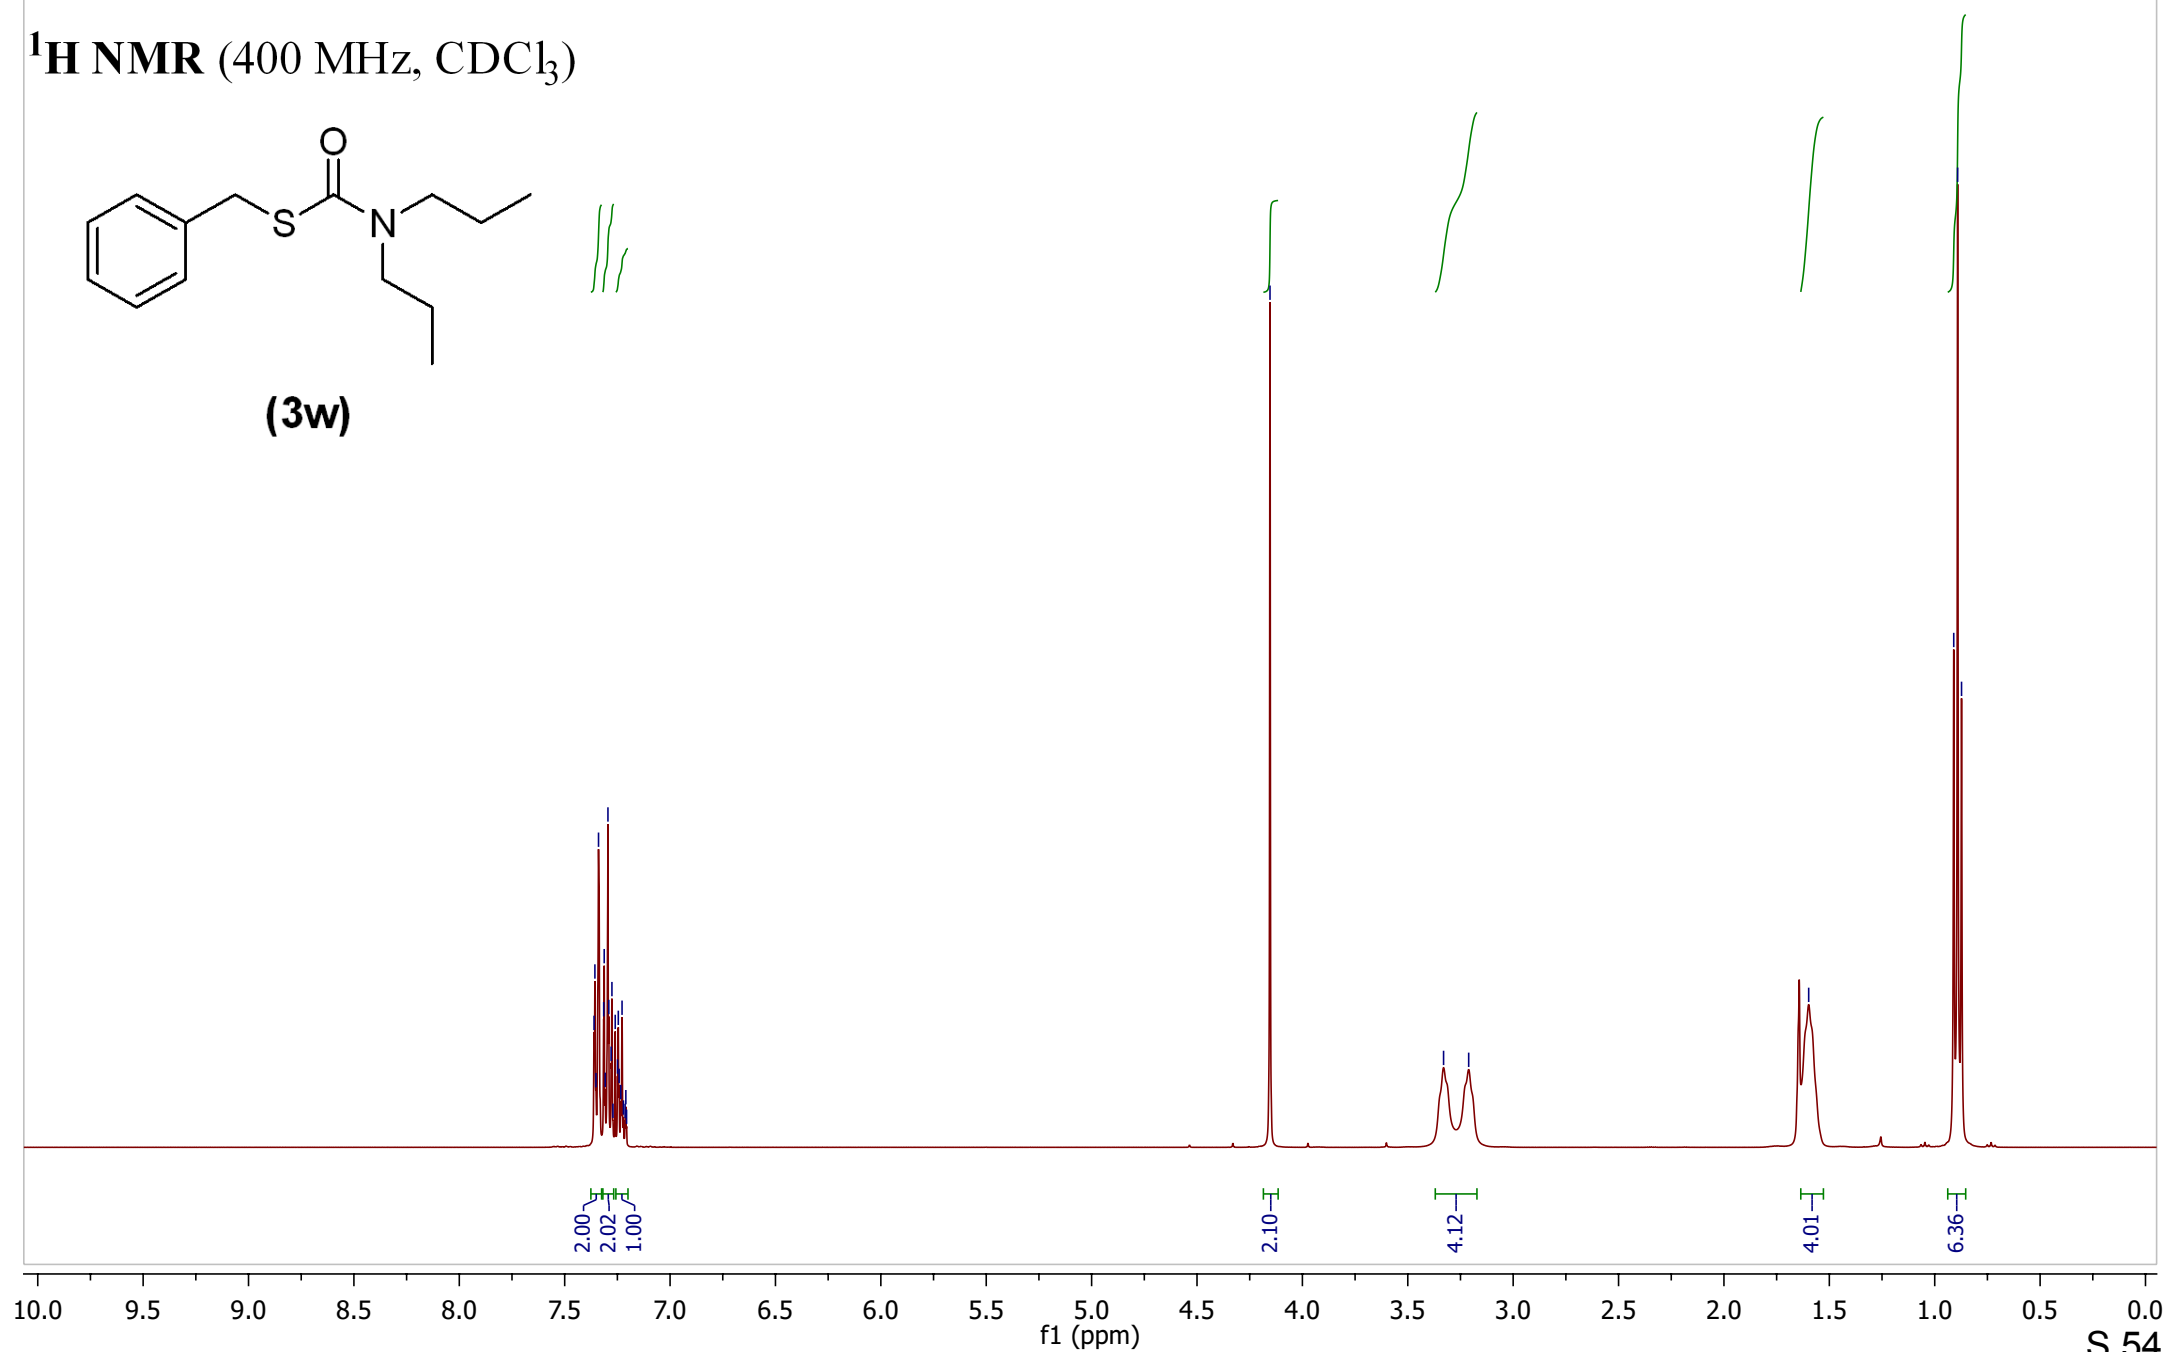

**$^{13}\text{C}$  NMR (100 MHz,  $\text{CDCl}_3$ )**



**(3w)**

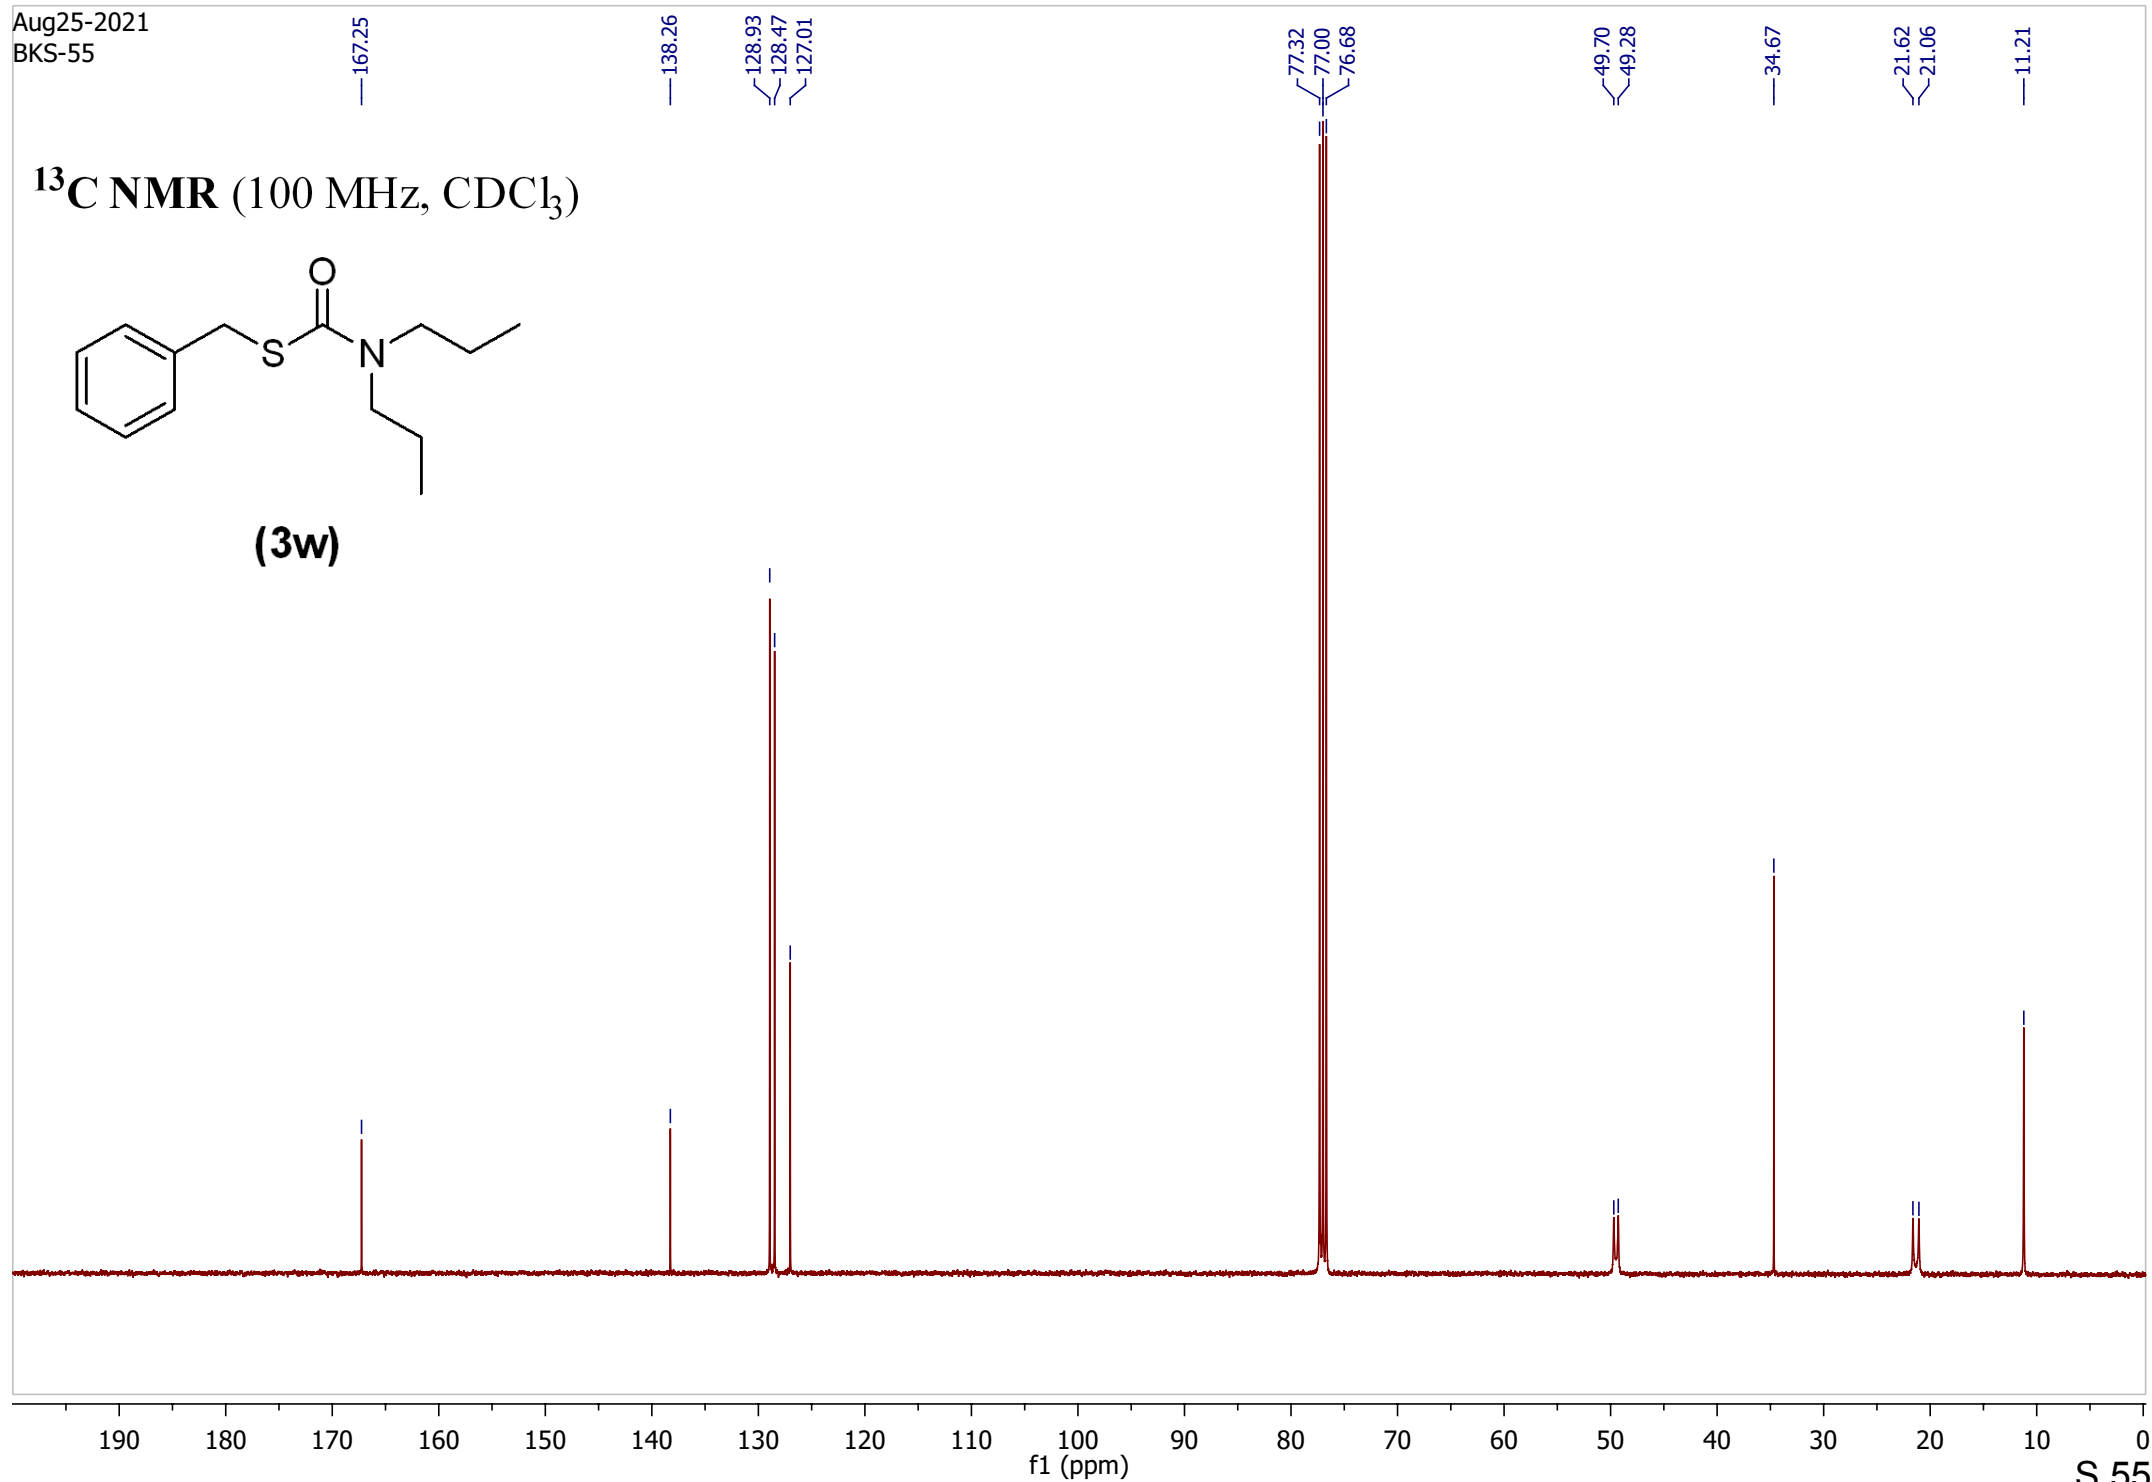

Aug25-2021  
BKS-54

$^1\text{H}$  NMR (400 MHz,  $\text{CDCl}_3$ )

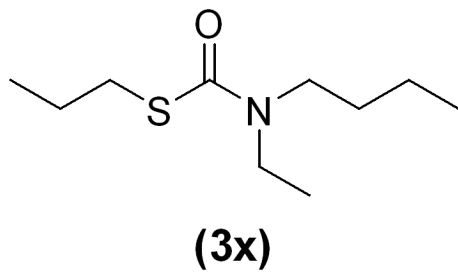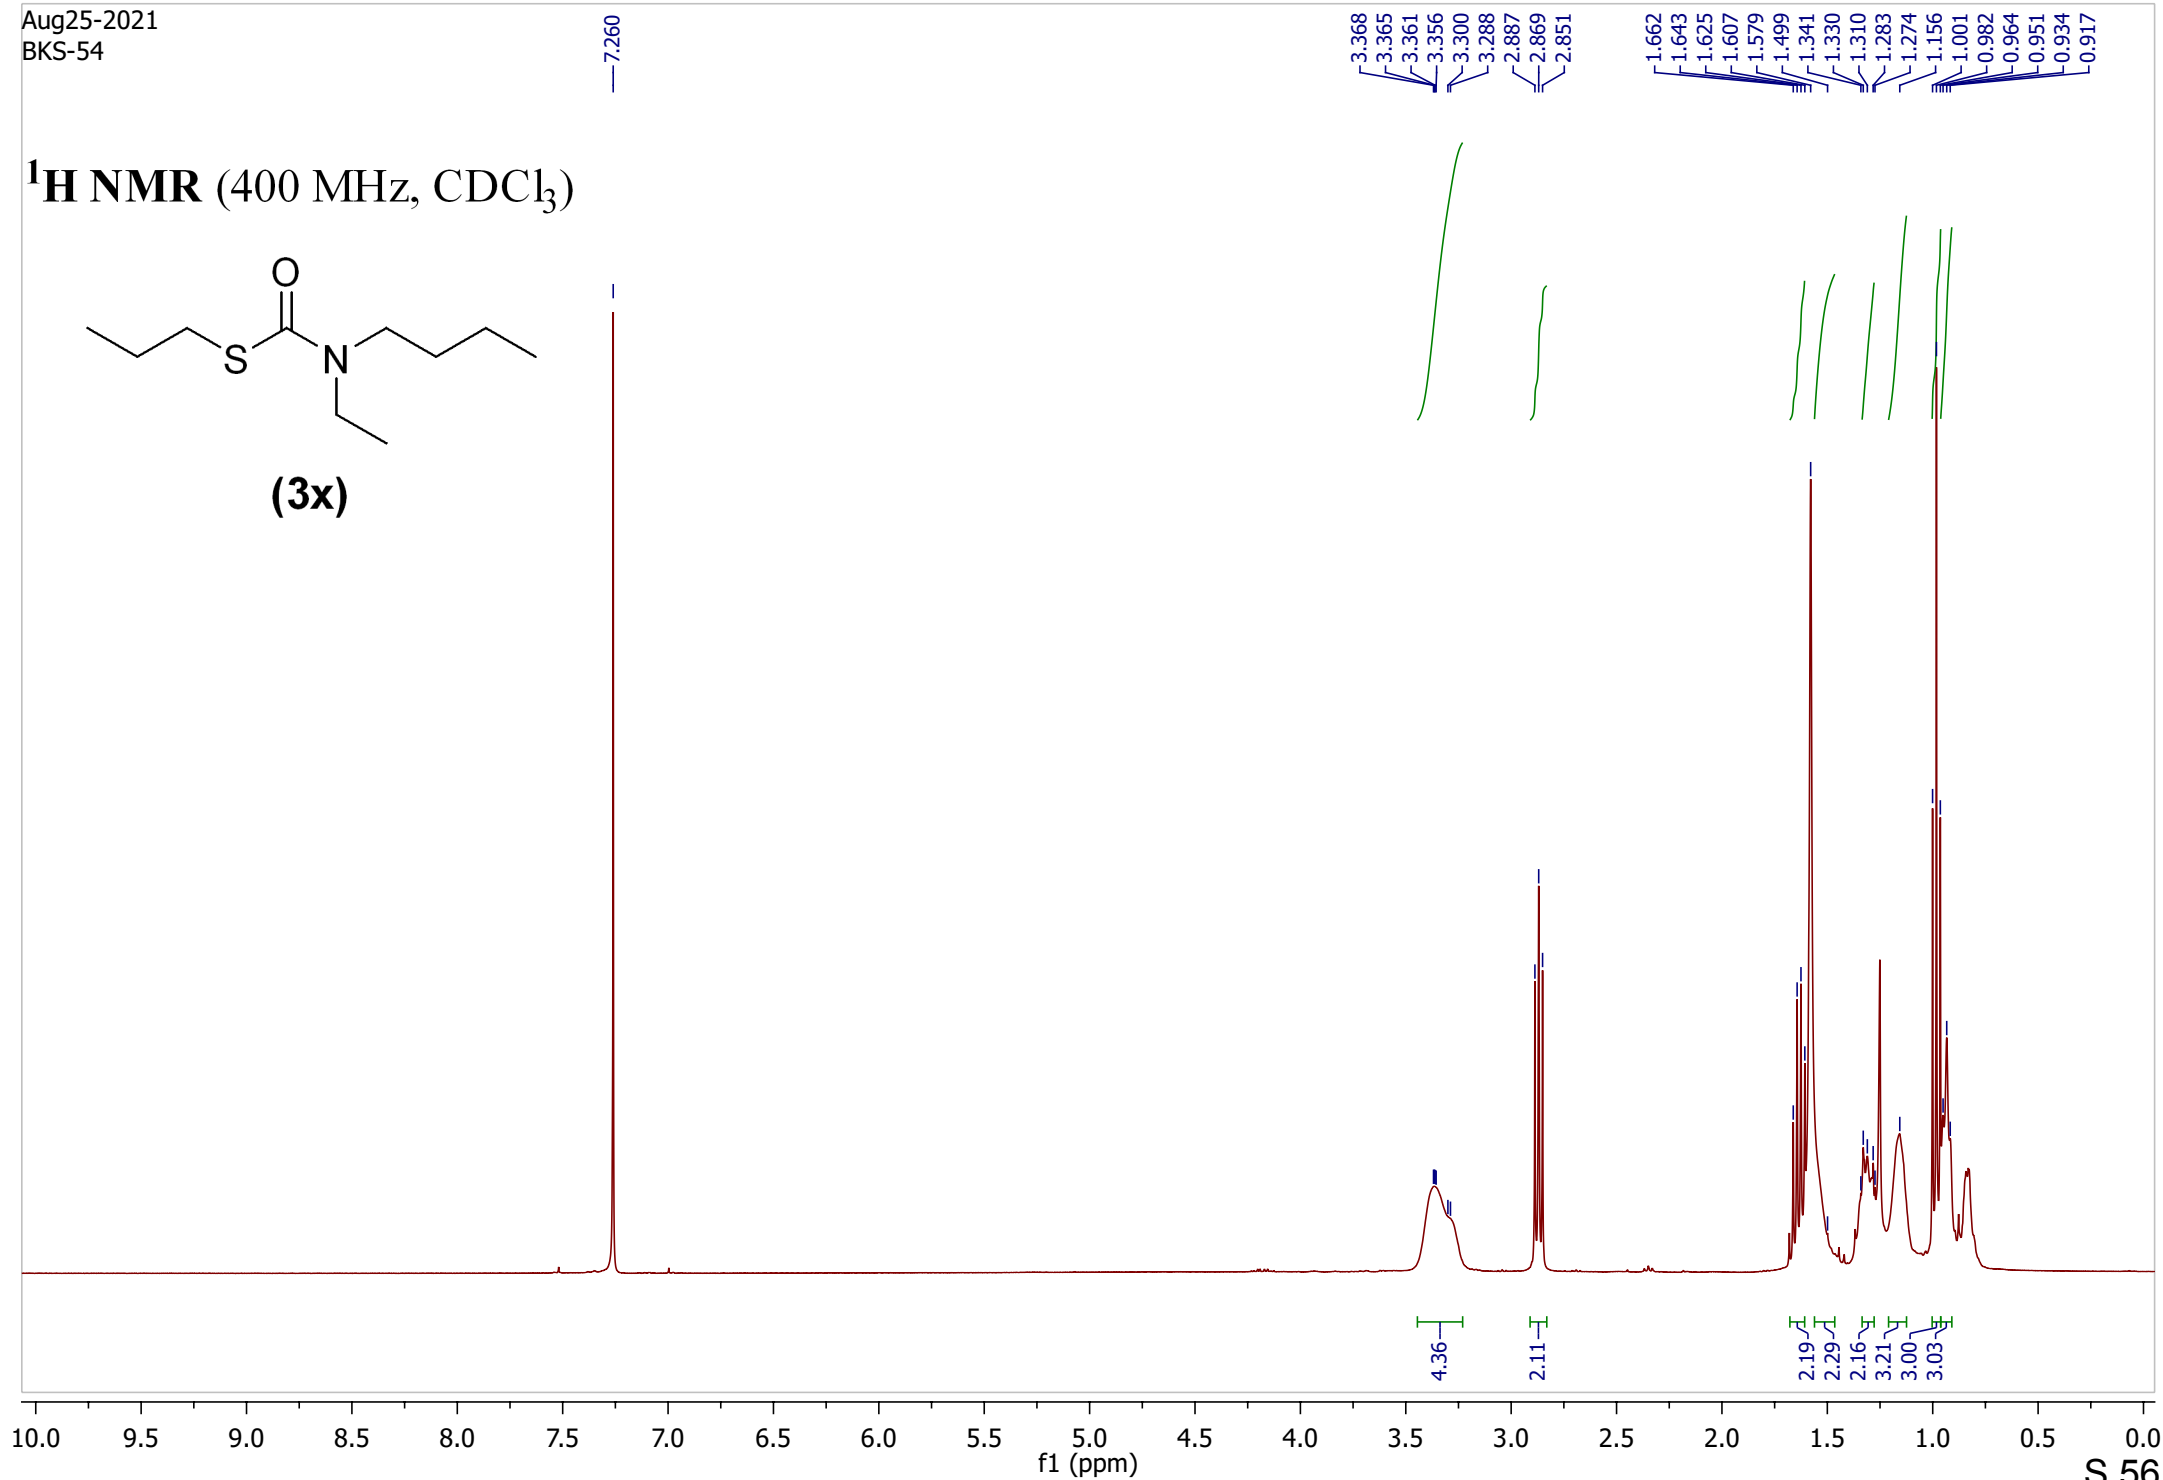

Aug25-2021  
BKS-54

$^{13}\text{C}$  NMR (100 MHz,  $\text{CDCl}_3$ )

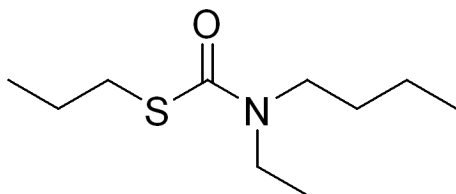

(3x)

—167.55

77.32  
77.00  
76.68

—32.15

—23.59

—20.09

13.81

13.43

200 190 180 170 160 150 140 130 120 110 100 90 80 70 60 50 40 30 20 10 0

f1 (ppm)

**<sup>1</sup>H NMR (400 MHz, CDCl<sub>3</sub>)**

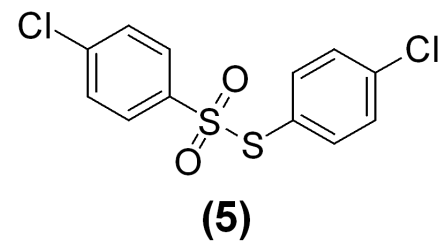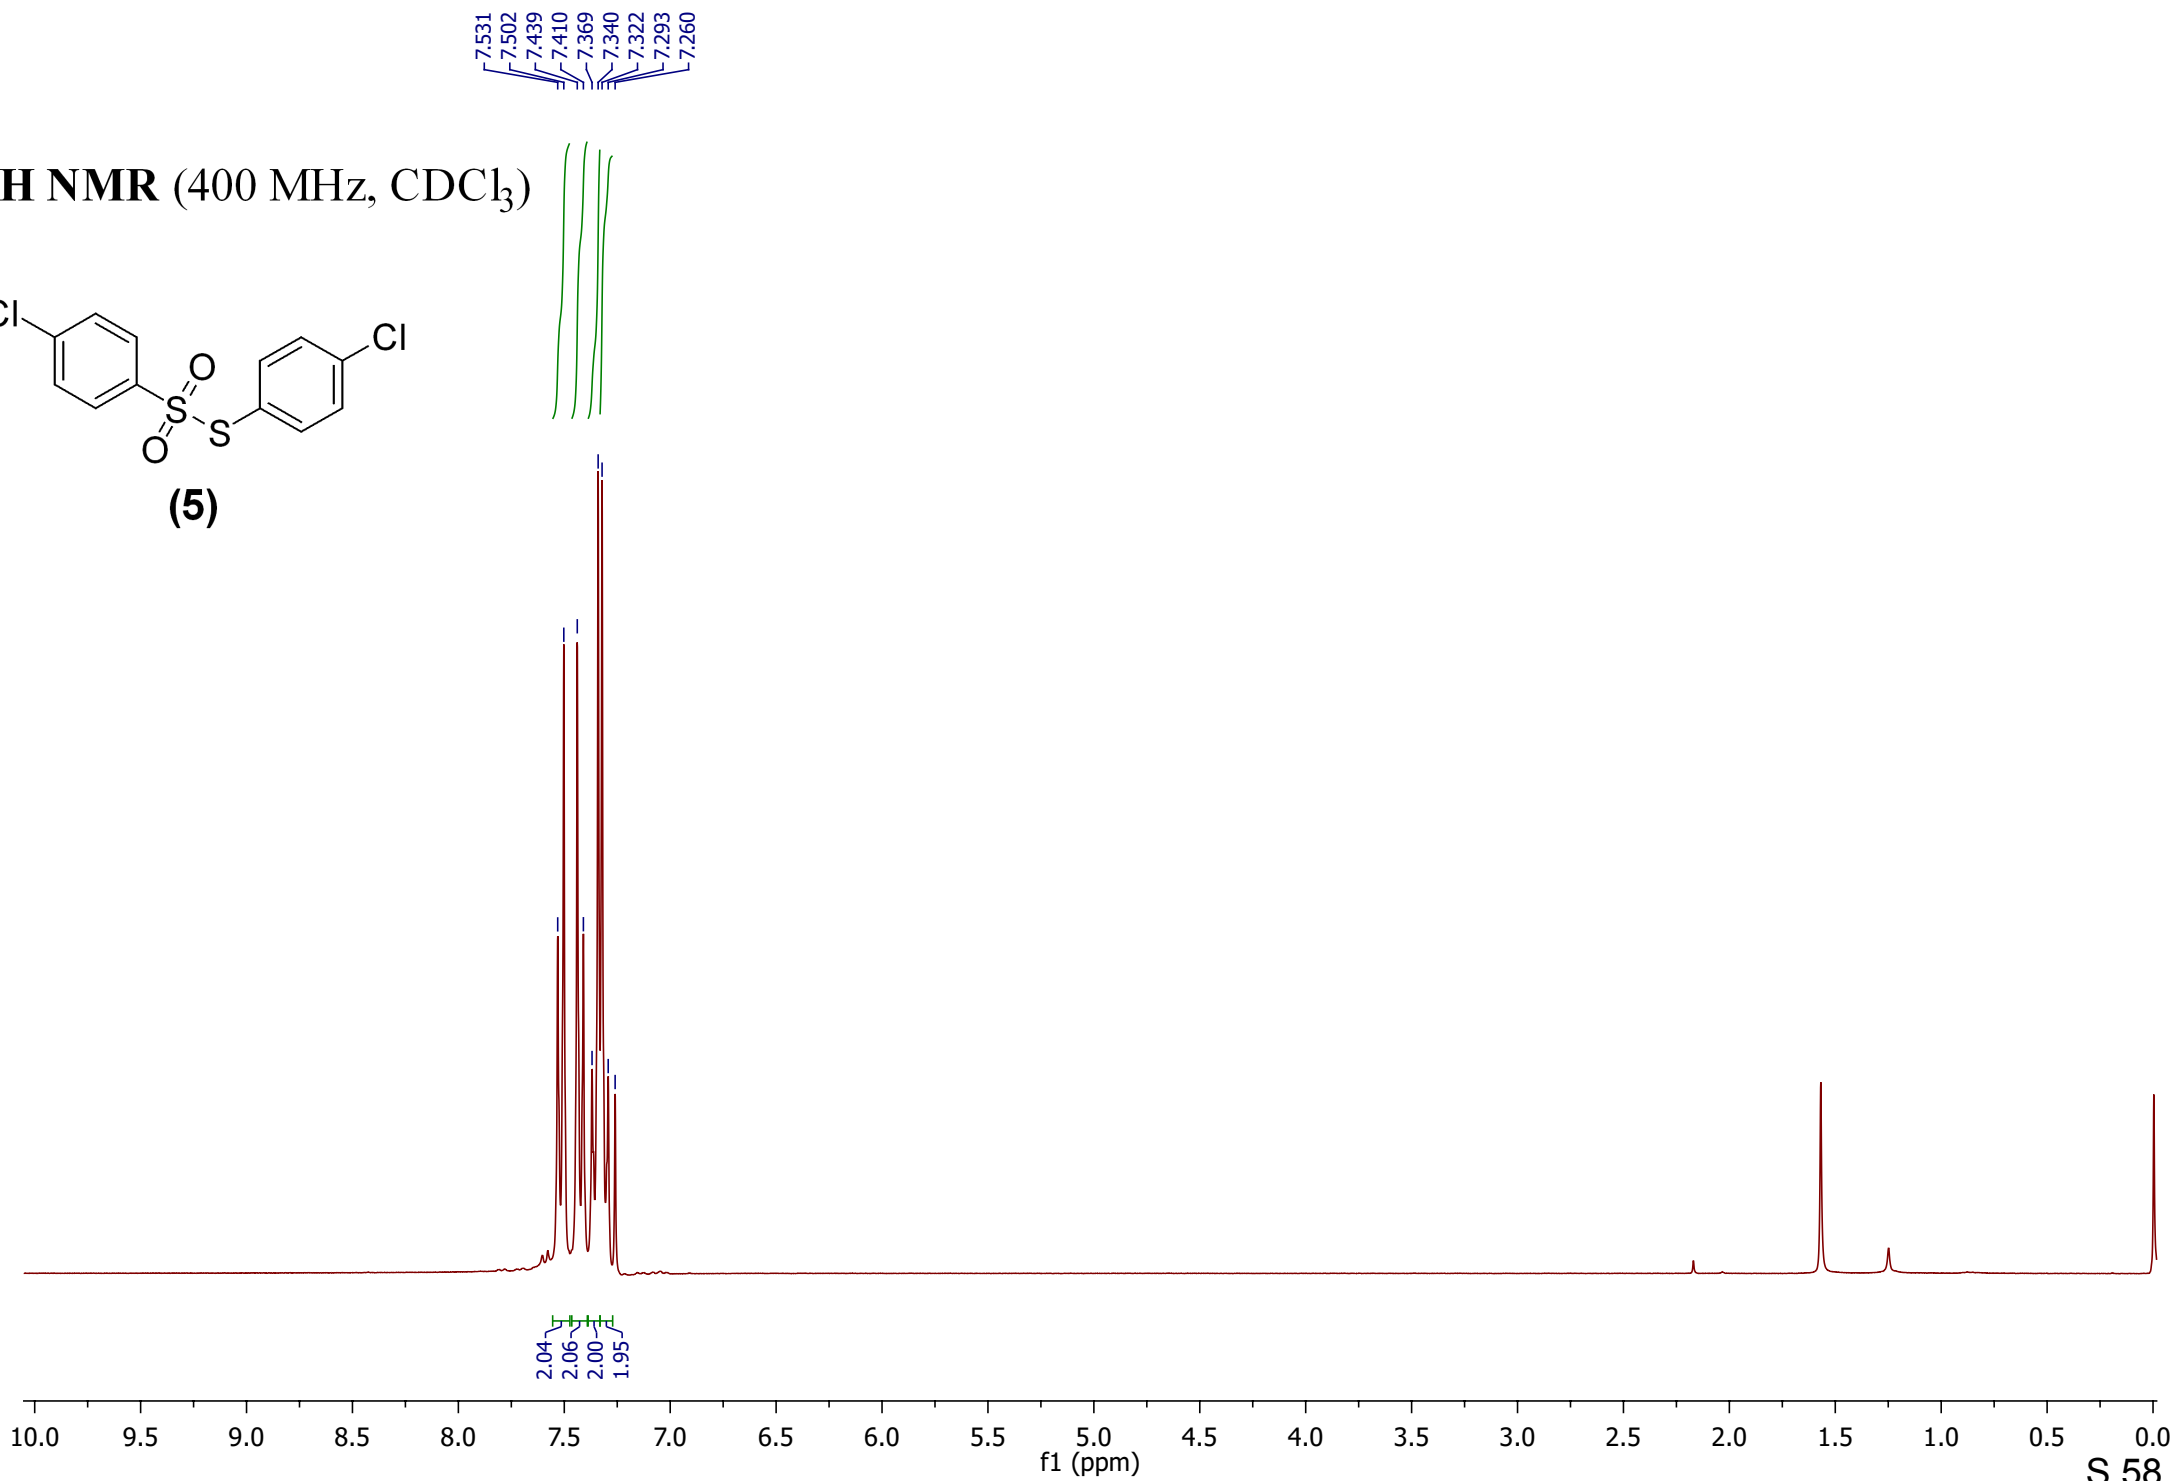

<sup>13</sup>C NMR (100 MHz, CDCl<sub>3</sub>)

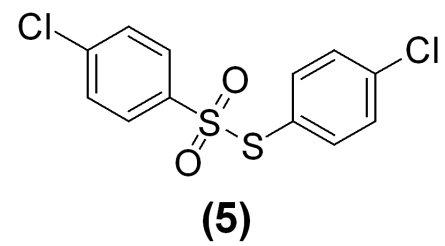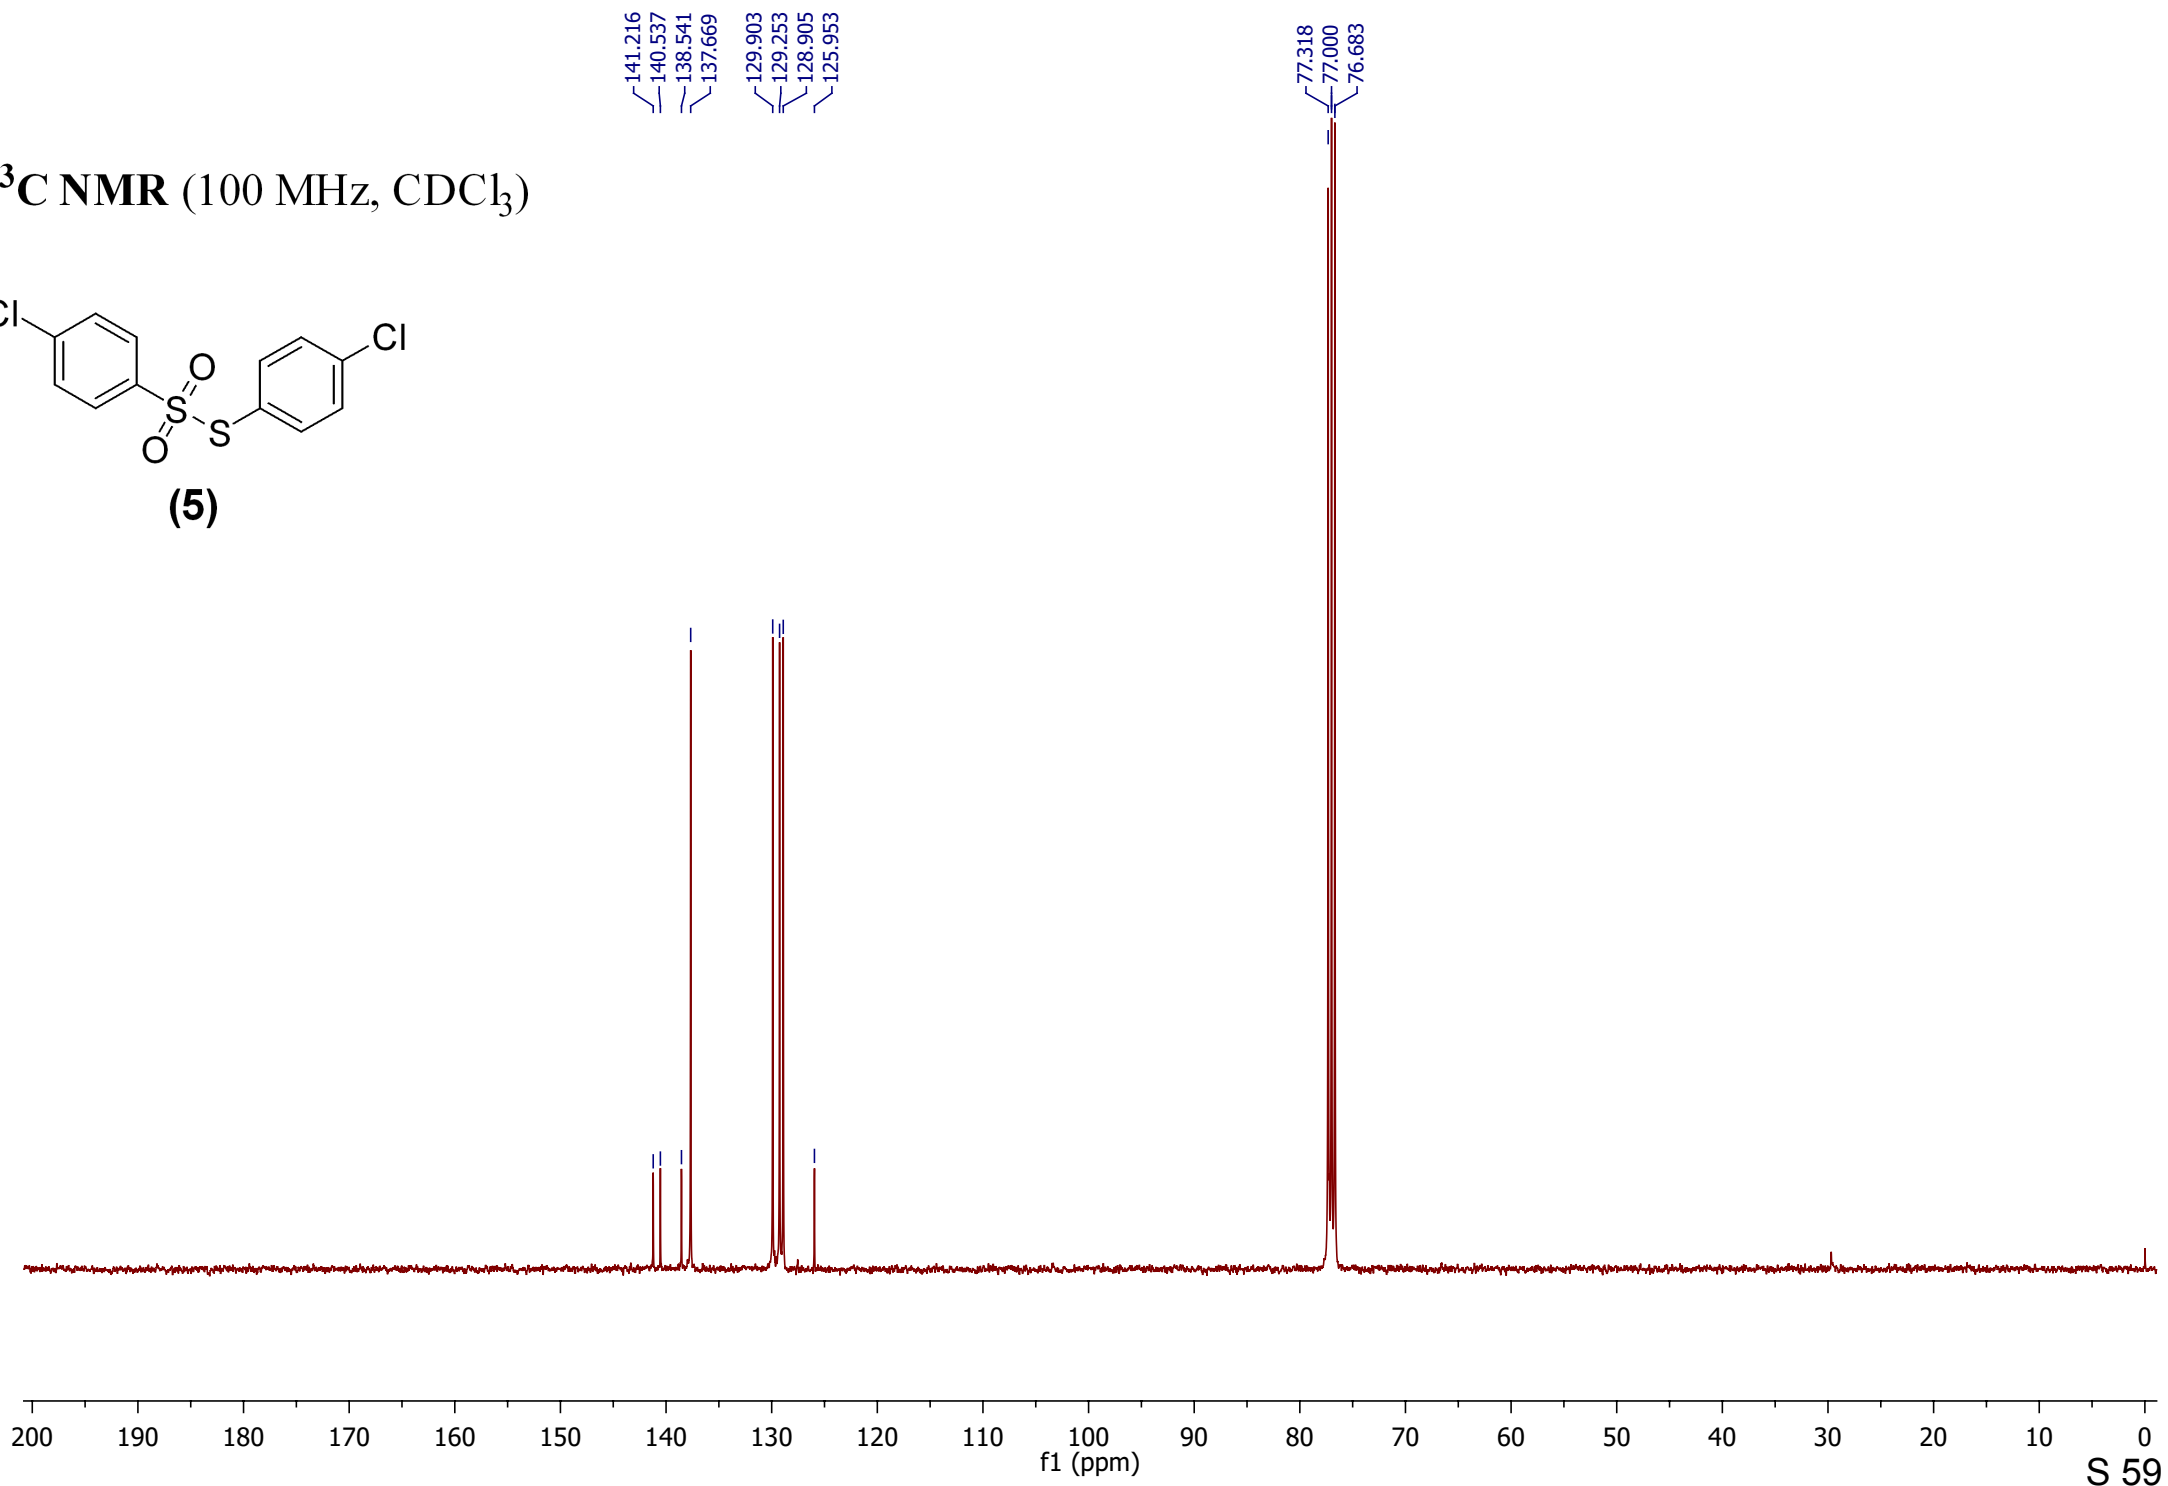

Supplement: d1ob01701b1.pdf [file d1ob01701b1.pdf]
